# Supplementary material for: Different neuronal populations mediate inflammatory pain analgesia by exogenous and endogenous opioids
Source: eLife. 2020 Jun 10;9:e55289. doi: 10.7554/eLife.55289 (PMC7311172; doi:10.7554/eLife.55289)
Supplement: Figure 1—source data 1. [file elife-55289-fig1-data1.xlsx]

## Sheet: 1g
	vgat			vglut2
Cortex	23.6287	16.7665	17.1664	23.569	27.5449	20.3439
NAc	100	100	100	0	0	0
Striatum	100	100	100	0	0	0
MS	74.6377	71.1268	70.2128	25.2525	28.8732	22.695
hippo	100	100	100	0	0	0
AH/DMH	96.8847	87.1046	91.3144	7.35786	9.71503	13.6159
LH	28.4884	40.5316	72.3308	72.327	55.1495	47.7569
ZI	91.7949	89.6552	87.1565	2.91971	10.3463	8.33015
CeA	100	100	100	0	0	0
Thalamus	0	0	0	100	100	100
IPN	100	100	100	0	0	0
SN	100	100	100	0	0	0
PAG	21.5217	29.882	16.0181	78.672	70.118	71.1655
PB	2.50896	1.86125	5.21844	99.6416	98.1388	89.363
SC	53.2609	36.1227	46.3113	45.9239	64.7141	56.7182
IC	2.1148	1.0989	7.31051	99.6979	98.9011	82.5785

## Sheet: 1-s1f
Vglut1	Vglut2	Vgat
81.1613	23.569	23.6287
74.8408	27.5449	16.7665
80.3157	20.3439	17.1664
