# Supplementary material for: Different neuronal populations mediate inflammatory pain analgesia by exogenous and endogenous opioids
Source: eLife. 2020 Jun 10;9:e55289. doi: 10.7554/eLife.55289 (PMC7311172; doi:10.7554/eLife.55289)
Supplement: Figure 2—source data 1. [file elife-55289-fig2-data1.xlsx]

## Sheet: 2de- MOR-KI oft locomotor
						morphine: 10mg/ kg
			baseline		after morphine +40min
DOB	Mouse NO.	GENOTYPE	distance	speed	distance	speed		experiment date	Mouse NO. in analysis excel
5/8/17	18	KI	4570.6	13.5	3013.9	12.6		folder 20170731	mouse 4
	19	KI	3481.2	11.8	2839.9	10.9			mouse 2
	22	WT	6567.9	15.8	10754.9	21.7			mouse 5
5/8/17	23	KI	4488.2	13	2389.5	10.8			mouse 3
	24	WT	5586.4	14.2	16242.1	30.8			mouse 1
5/29/17	45	KI	6567.9	12.7	3671.1	12.3			mouse 6
5/31/17	48	WT	4903.7	13.8	10754.9	35.3			mouse 7
	50	WT	4974.3	12.9	19653.1	34.9			mouse 10
6/3/17	53	WT	4615.5	14	17711.5	33			mouse 9
	54	WT	5361.9	14	21424.8	38.1			mouse 11
	56	KI	4200.2	12.7	4361.8	14			mouse 8
5/21/17	28	WT	4152.7	12.3	14539.1	24.8			mouse 15
	35	WT	3069.4	10.6	15999.5	28.6			mouse 14
5/26/17	39	KI	3705.5	11.2	3417.2	11.5			mouse 13
	41	WT	5358.8	13.8	19370.8	34.1			mouse 12
6/21/17	65	WT	3844.3	12.1	15872.9	28.4		20170821
	68	KI	5043.9	13	4439.2	12.6
	71	KI	3772.7	11.9	1839.8	11.8
	69	WT	3536	12	16524.2	30.2
	70	KI	2719.5	11	2155	10.8

## Sheet: 2f-MOR-KI s.c. tail immersion
	HE*HE			50 ℃ tail immersion, cut-off: 20 s
				morphine: 10 mg/ kg, s.c.
				withdrawal latency (s)
experiment date	DOB	Mouse NO.	GENOTYPE	baseline			after Morphine+40min		baseline average	after average	%MPE
20170711	5/8/17	18	KI	2.13	1.84	2.35	2.56	2.37	2.10667	2.465	2.00261
		19	KI	1.91	2.03	2.17	2.12	2.9	2.03667	2.51	2.635
		22	WT	2.68	2.47	2.43	20	20	2.52667	20	100
	5/8/17	23	KI	2.06	2.9	3.19	1.99	2.78	2.71667	2.385	-1.919
		24	WT	2.53	1.97	2.96	20	20	2.48667	20	100
20170728	5/29/17	45	KI	2.03	2.21	3.57	2.88	3.8	2.60333	3.34	4.23453
	5/31/17	48	WT	2.2	2.8	3.5	20	20	2.83333	20	100
		50	WT	2.45	2.47	3.56	20	20	2.82667	20	100
	6/3/17	53	WT	3.78	3.64	2.59	20	20	3.33667	20	100
		54	WT	2.31	3.66	2.66	20	20	2.87667	20	100
		56	KI	1.98	3.59	2.81	3.52	3.49	2.79333	3.505	4.13599
	5/21/17	28	WT	2.16	2.59	3.88	20	20	2.87667	20	100
		35	WT	2	2.28	3.28	20	20	2.52	20	100
	5/26/17	39	KI	2.07	2.03	2.44	3	3.24	2.18	3.12	5.27497
		41	WT	3.53	3.31	2.28	20	20	3.04	20	100
20170901	6/21/17	65	WT	2.31	2.53	3.21	20	20	2.68333	20	100
		68	KI	2.16	2.35	1.97	2.5	2.37	2.16	2.435	1.54148
		71	KI	3.314	2.81	4.42	3.96	3.52	3.51467	3.74	1.36687
		69	WT	2.56	2.28	2.22	20	20	2.35333	20	100
		70	KI	2.72	3.17	2.5	3.03	3.12	2.79667	3.075	1.6179

## Sheet: 2g-MOR-KI s.c. hot plate
	HE*HE			52 ℃ hot plate, cut-off: 45 s
				morphine: 10 mg/ kg, s.c.
				withdrawal latency (s)
experiment date	DOB	Mouse NO.	GENOTYPE	baseline		after Morphine +40 min		baseline average	after average	% MPE
20170711	5/8/17	18	KI	17	16.6	14.5	20.1	16.8	17.3	1.77305
		19	KI	19.9	19.5	17.9	19.2	19.7	18.55	-4.54545
		22	WT	19.8	17.9	45	45	18.85	45	100
	5/8/17	23	KI	28.4	30.4	30.2	27.2	29.4	28.7	-4.48718
		24	WT	25.7	25	45	45	25.35	45	100
20170728	5/29/17	45	KI	18.6	22.4	22.5	19.5	20.5	21	2.04082
	5/31/17	48	WT	28	15.3	34	45	21.65	39.5	76.4454
		50	WT	22.5	17.4	45	45	19.95	45	100
	6/3/17	53	WT	14.5	17	45	45	15.75	45	100
		54	WT	25.9	24.5	45	45	25.2	45	100
		56	KI	22.1	23.6	18.3	18.6	22.85	18.45	-19.8646
	5/21/17	28	WT	23	19.7	39.8	40	21.35	39.9	78.4355
		35	WT	25.9	20	45	45	22.95	45	100
	5/26/17	39	KI	22.9	21.9	23.9	20.9	22.4	22.4	0
		41	WT	19.9	16.1	45	45	18	45	100
20170901	6/21/17	65	WT	15.3	25.1	45	45	20.2	45	100
		68	KI	17.4	17	7.4	30.9	17.2	19.15	7.01439
		71	KI	21.9	20.9	20.9	24.2	21.4	22.55	4.87288
		69	WT	22.8	16.8	45	45	19.8	45	100
		70	KI	22.9	16.5	19.6	20.6	19.7	20.1	1.58103

## Sheet: 2h-MOR-KI HE formalin
							Morphine 10mg/kg,i.p.
							Saline
					MOR-KI-/-
Experiment date	Video	Number	start time	Date of birth	Mouse NO.	Weight(g)	Treatment	0-5	5-10	10-15	15-20	20-25	25-30	30-35	35-40	40-45	45-50	50-55	55-60	0-10	10-60
10/17/19	Video 12	1	00:05:00	7/31/19 8/1/19	63	32.2	M	94.41	36.98	2.96	84.07	16.69	92.32	115.34	3.64	45.57	11.57	0.97	29.76	131.39	402.89
		2	00:40:00		62	33.5	M	1.54	0	0.4	0	0	0	0	0.84	0	5.1	7.35	16.97	1.54	30.66
		3	01:20:00		59	31.3	S	59.18	2.51	7.27	59.71	132.65	35.57	0.6	0	0	0	0	2.27	61.69	238.07
		4	01:50:00		61	27.1	S	57.66	0.69	0	0.75	2.34	38.22	68.79	1.06	0.49	0.94	2.07	0.4	58.35	115.06
		5	02:40:00		58	33.9	M	43.09	0.75	0.99	3.05	73.5	156.81	40.94	3.89	2.69	0.88	0.4	11	43.84	294.15
		6	03:10:00		60	33.3	M	2.17	0.94	0	0.44	0.23	0	0	0.78	0	0	1.5	3.27	3.11	6.22
	Video 1485	2		8/1/19 8/4/19 8/14/19	74	27.2	M	2.5	0.22	0.4	0.6	0.22	0.22	1.72	1.9	3.43	1.22	0	0	2.72	9.71
		5			72	31.5	M	43.74	24.94	102.46	80.64	62.55	28.83	7.32	1.42	0.4	64.3	0	4.16	68.68	352.08
		6			67	31.5	S	86.75	17.19	61.97	17.92	137.89	8.43	0.25	0	0	0	0	71.39	103.94	297.85
	Video 13	1	00:05:00	7/13/19	41	31.1	S	86.99	1.85	1.26	81.2	81.04	16.07	23.84	3.47	0.4	11.75	40.82	57.8	88.84	317.65
		2	00:40:00		46	30.2	S	48.99	0	19.06	0	72.18	31.5	101.39	21.59	40.1	0	0.44	0	48.99	286.26
		3	01:00:00		44	32.1	M	9.54	0.49	0.44	0.69	0	0	0	1	2.66	8.81	12.02	5.23	10.03	30.85
		4	01:30:00		42	34	S	71.81	13.24	55.95	100.5	15.8	27.51	0.25	0.72	1.4	0.44	0.19	0.4	85.05	203.16
		5	01:50:00		43	31.8	M	31.93	0.28	34.63	59.15	23.2	47.22	45.1	2.6	1.23	1.5	0.8	0	32.21	215.43
		6	02:10:00		45	28.3	M	6.08	1.71	0.22	0	4.69	4.66	15.56	2.53	26.51	24.31	12.43	15.52	7.79	106.43
	Video 1486	1	00:50:00	7/15/19	50	30.6	S	73.8	0.8	17.85	28.25	106.61	77.75	8.61	3.57	0.47	0	0.28	0.75	74.6	244.14
		2	01:10:00		47	31.2	S	59.28	5.84	72.76	116.71	36.93	75.15	0.38	0.22	55.39	78.03	74.58	25.32	65.12	535.47
		3	00:20:00		49	31.1	S	91.76	2.66	70.74	38.63	25.68	40.28	11.86	9.87	19.98	15.92	1.53	0.63	94.42	235.12
		4	01:30:00		51	30.2	M	6.89	0.19	0	0	0	0	0.5	2.82	0.53	4.15	0.87	0	7.08	8.87
11/5/19	Video 19	1	0	9/11/19	104		S	35.29	13.03	7.66	43.09	56.77	128.01	145.51	104.1	85.97	0.22	0.63	0.22	48.32	572.18
		2	00:30:00		108		S	52.74	6.84	6.25	56.24	73.54	85.78	48.78	90.24	82.96	0.45	0.57	0	59.58	444.81
		3	01:00:00		96		S	27.94	0.2	0.22	8.57	57.98	46.88	101.54	100.83	10.15	54.24	49.5	0.6	28.14	430.51
11/20/19	Video 21	1	00:00:00	9/26/19	116	27.3	S	34.23	6.34	5.95	137.65	183.88	82.52	184.36	0.22	0.41	0	0.6	62.39	40.57	657.98
		2	00:25:00		119	28	M	47.12	21.41	10.13	32.86	158.2	90.02	127.9	36.17	70.54	36.5	28.06	91.04	68.53	681.42
		3	00:50:00		120	16	M	67.09	4.31	2.13	3.06	36.88	1.66	0.31	2.64	0.43		1.9		71.4	49.01	长牙，体重轻

## Sheet: 2i-MOR-KI Hargreaves
		20190825	WT MOR-KI littermate							20190825	WT MOR-KI littermate					20190826	WT MOR-KI littermate							20190828	WT MOR-KI littermate							20190830	WT MOR-KI littermate							20190901		WT MOR-KI littermate						failed
		Baseline	Hargreaves	Intensity=8	cutoff time=20 sec		mean	mean		CFA 2h	Hargreaves		mean	mean		CFA d1	Hargreaves		cutoff time=20 sec		mean	mean		CFA d3	Hargreaves		cutoff time=20 sec		mean	mean		CFA d5	Hargreaves		cutoff time=20 sec		mean	mean		CFA d7		Hargreaves		cutoff time=20 sec		mean	mean	morphine
original No.	genotype	No.	left hindpaw		right hindpaw		lhp	rhp		lhp	left hindpaw	right hindpaw	lhp	rhp		lhp	left hindpaw		right hindpaw		lhp	rhp		No.	left hindpaw		right hindpaw		lhp	rhp		No.	left hindpaw		right hindpaw		lhp	rhp		No.	BW (g)	left hindpaw		right hindpaw		lhp	rhp	rhp
9	MOR-KI	1	6.1	10.1	9.9	6.5	8.1	8.2		1	10.5	1.5	10.5	1.5		1	6.4	11.9	1.9	0.9	9.15	1.4		1	6.4	6.9	0.9	1.9	6.65	1.4		1	10.9	7.8	1.9	0.9	9.35	1.4		1	34.2	6.9	6.1	3.9	6.6	6.5	5.25	3.8
12	WT	2	11.8	6.8	13.8	14.9	9.3	14.35		2	7.2	1.4	7.2	1.4		2	7.7	9.9	1.8	0.9	8.8	1.35		2	7.8	10.5	2.3	1.6	9.15	1.95		2	6.3	6	6.5	4.9	6.15	5.7		2	32.9	11.1	6.9	4.9	8.7	9	6.8	8.7
13	MOR-KI	3	9.2	8.5	11.4	7.2	8.85	9.3		3	6.9	0.9	6.9	0.9		3	9.8	7.1	1.1	0.9	8.45	1		3	10.5	12.2	5.9	4.5	11.35	5.2		3	10.9	7.9	4.9	2.2	9.4	3.55		3	32.4	6.2	11.8	4.9	5.7	9	5.3	1.2
16	WT	4	7.7	7.9	6.1	7.1	7.8	6.6		4	7.8	1.7	7.8	1.7		4	6.4	7.9	1.1	1.9	7.15	1.5		4	6.2	10.9	2.1	1.9	8.55	2		4	6.3	6.4	1.1	1.5	6.35	1.3		4	28	6.1	6.4	6.6	5.3	6.25	5.95	4.9
18	WT	5	12.9	6.7	7.3	8.3	9.8	7.8		5	6.3	0.6	6.3	0.6		5	6.4	6.1	0.4	0.6	6.25	0.5		5	6.5	9.6	2.9	2.6	8.05	2.75		5	6.3	5.9	3.9	3.3	6.1	3.6		5	27	5.7	6.4	6.7	3.4	6.05	5.05
24	MOR-KI	6	12.1	12.9	10.9	6.1	12.5	8.5		6	6.2	0.8	6.2	0.8		6	6.1	11.9	0.4	0.9	9	0.65		6	10.1	6.6	5.2	2.2	8.35	3.7		6	9.9	8.1	3.9	2.9	9	3.4		6	26.5	6.2	8.3	1.2	6.8	7.25	4	1.5
26	MOR-KI	7	6.9	11.7	8.1	7.6	9.3	7.85		7	6.9	0.9	6.9	0.9		7	6.9	11.5	1.7	2.5	9.2	2.1		7	6.2	7.3	1.5	2.1	6.75	1.8		7	6.2	6.1	3.2	3.9	6.15	3.55		7	26.2	10.8	6.4	4.8	2.1	8.6	3.45	1.8
34	WT	8	10.3	9.2	9.8	16.9	9.75	13.35		8	6.2	0.9	6.2	0.9		8	6.2	6.6	2.1	1.1	6.4	1.6		8	10.2	7.9	1.5	1.7	9.05	1.6		8	6.9	6.2	1.4	5.7	6.55	3.55		8	26.6	7.9	7.1	2.5	8.4	7.5	5.45	3.7
36	WT	9	7.3	6.3	6.5	7.1	6.8	6.8		9	8.8	1.6	8.8	1.6		9	6.9	6.3	1.3	1.4	6.6	1.35		9	7.2	6.1	4.6	2.8	6.65	3.7		9	6.5	7.4	1.2	3.4	6.95	2.3		9	26.8	6.2	6.2	6.5	2.9	6.2	4.7	5.3
37	MOR-KI	10	7.7	6.5	12.3	6.4	7.1	9.35		10	9.9	2.9	9.9	2.9		10	8.7	12.6	1.9	1.2	10.65	1.55		10	8.3	7.1	1.9	3.9	7.7	2.9		10	7.5	6.1	6.3	1.3	6.8	3.8		10	27.3	6.3	9.9	2.1	3.9	8.1	3	1.7
28	WT	11	9.4	8.2	7.5	11.7	8.8	9.6		11	13.5	0.6	13.5	0.6		11	11.6	9.9	0.9	1.3	10.75	1.1		11	7.3	9.2	1.7	5.5	8.25	3.6		11	8.3	8.8	3.3	4.8	8.55	4.05		11	25.3	10.9	6.7	2.2	2.3	8.8	2.25	5.4
29	MOR-KI	12	6.9	6.2	6.4	6.4	6.55	6.4		12	6.1	1.3	6.1	1.3		12	12.1	8.2	4.2	2.5	10.15	3.35		12	8.5	6.6	1.7	2.9	7.55	2.3		12	7.5	9.1	4.3	1.1	8.3	2.7		12	28.5	6.1	8.3	3.7	3.3	7.2	3.5	3.9
30	WT	13	8.9	10.3	6.6	6.6	9.6	6.6		13	6.4	0.9	6.4	0.9		13	7.1	11.2	1.6	0.7	9.15	1.15		13	6.4	6.1	1.6	1.1	6.25	1.35		13	7.8	10.3	4.6	3.7	9.05	4.15		13	26	9.6	8.5	4.8	9.2	9.05	7
31	WT	14	11.2	7.3	6.9	9.5	9.25	8.2		14	7.2	1.1	7.2	1.1		14	6.1	6.3	3.2	3.9	6.2	3.55		14	6.4	7.1	3.3	4.9	6.75	4.1		14	6.9	9.2	7.7	2.5	8.05	5.1		14	26.6	10.2	7.9	1.8	7.2	9.05	4.5	7.3
32	WT	15	8.2	8.5	9.5	6.1	8.35	7.8		15	12.2	0.9	12.2	0.9		15	11.6	8.4	0.9	2.1	10	1.5		15	8.7	6.9	1.5	1.5	7.8	1.5		15	8.3	8.7	7.3	6.9	8.5	7.1		15	26.7	9.4	6.1	7.9	6.9	7.75	7.4
		Baseline								CFA 2h						CFA d1								CFA d3								CFA d5								CFA d7
		No.	left hindpaw		right hindpaw		lhp	rhp		lhp	left hindpaw	right hindpaw	lhp	rhp		lhp	left hindpaw		right hindpaw		lhp	rhp		No.	left hindpaw		right hindpaw		lhp	rhp		No.	left hindpaw		right hindpaw		lhp	rhp		No.		left hindpaw		right hindpaw		lhp	rhp	rhp
12	WT	2	11.8	6.8	13.8	14.9	9.3	14.35		2	7.2	1.4	7.2	1.4		2	7.7	9.9	1.8	0.9	8.8	1.35		2	7.8	10.5	2.3	1.6	9.15	1.95		2	6.3	6	6.5	4.9	6.15	5.7		2	32.9	11.1	6.9	4.9	8.7	9	6.8	8.7
16	WT	4	7.7	7.9	6.1	7.1	7.8	6.6		4	7.8	1.7	7.8	1.7		4	6.4	7.9	1.1	1.9	7.15	1.5		4	6.2	10.9	2.1	1.9	8.55	2		4	6.3	6.4	1.1	1.5	6.35	1.3		4	28	6.1	6.4	6.6	5.3	6.25	5.95	4.9
18	WT	5	12.9	6.7	7.3	8.3	9.8	7.8		5	6.3	0.6	6.3	0.6		5	6.4	6.1	0.4	0.6	6.25	0.5		5	6.5	9.6	2.9	2.6	8.05	2.75		5	6.3	5.9	3.9	3.3	6.1	3.6		5	27	5.7	6.4	6.7	3.4	6.05	5.05
34	WT	8	10.3	9.2	9.8	16.9	9.75	13.35		8	6.2	0.9	6.2	0.9		8	6.2	6.6	2.1	1.1	6.4	1.6		8	10.2	7.9	1.5	1.7	9.05	1.6		8	6.9	6.2	1.4	5.7	6.55	3.55		8	26.6	7.9	7.1	2.5	8.4	7.5	5.45	3.7
36	WT	9	7.3	6.3	6.5	7.1	6.8	6.8		9	8.8	1.6	8.8	1.6		9	6.9	6.3	1.3	1.4	6.6	1.35		9	7.2	6.1	4.6	2.8	6.65	3.7		9	6.5	7.4	1.2	3.4	6.95	2.3		9	26.8	6.2	6.2	6.5	2.9	6.2	4.7	5.3
28	WT	11	9.4	8.2	7.5	11.7	8.8	9.6		11	13.5	0.6	13.5	0.6		11	11.6	9.9	0.9	1.3	10.75	1.1		11	7.3	9.2	1.7	5.5	8.25	3.6		11	8.3	8.8	3.3	4.8	8.55	4.05		11	25.3	10.9	6.7	2.2	2.3	8.8	2.25	5.4
30	WT	13	8.9	10.3	6.6	6.6	9.6	6.6		13	6.4	0.9	6.4	0.9		13	7.1	11.2	1.6	0.7	9.15	1.15		13	6.4	6.1	1.6	1.1	6.25	1.35		13	7.8	10.3	4.6	3.7	9.05	4.15		13	26	9.6	8.5	4.8	9.2	9.05	7
31	WT	14	11.2	7.3	6.9	9.5	9.25	8.2		14	7.2	1.1	7.2	1.1		14	6.1	6.3	3.2	3.9	6.2	3.55		14	6.4	7.1	3.3	4.9	6.75	4.1		14	6.9	9.2	7.7	2.5	8.05	5.1		14	26.6	10.2	7.9	1.8	7.2	9.05	4.5	7.3
32	WT	15	8.2	8.5	9.5	6.1	8.35	7.8		15	12.2	0.9	12.2	0.9		15	11.6	8.4	0.9	2.1	10	1.5		15	8.7	6.9	1.5	1.5	7.8	1.5		15	8.3	8.7	7.3	6.9	8.5	7.1		15	26.7	9.4	6.1	7.9	6.9	7.75	7.4
						WT	8.82778	9.01111				WT	8.4	1.07778						WT	7.92222	1.51111						WT	7.83333	2.50556						WT	7.36111	4.09444							WT	7.73889	5.45556	5.88333
9	MOR-KI	1	6.1	10.1	9.9	6.5	8.1	8.2		1	10.5	1.5	10.5	1.5		1	6.4	11.9	1.9	0.9	9.15	1.4		1	6.4	6.9	0.9	1.9	6.65	1.4		1	10.9	7.8	1.9	0.9	9.35	1.4		1	34.2	6.9	6.1	3.9	6.6	6.5	5.25	3.8
13	MOR-KI	3	9.2	8.5	11.4	7.2	8.85	9.3		3	6.9	0.9	6.9	0.9		3	9.8	7.1	1.1	0.9	8.45	1		3	10.5	12.2	5.9	4.5	11.35	5.2		3	10.9	7.9	4.9	2.2	9.4	3.55		3	32.4	6.2	11.8	4.9	5.7	9	5.3	1.2
24	MOR-KI	6	12.1	12.9	10.9	6.1	12.5	8.5		6	6.2	0.8	6.2	0.8		6	6.1	11.9	0.4	0.9	9	0.65		6	10.1	6.6	5.2	2.2	8.35	3.7		6	9.9	8.1	3.9	2.9	9	3.4		6	26.5	6.2	8.3	1.2	6.8	7.25	4	1.5
26	MOR-KI	7	6.9	11.7	8.1	7.6	9.3	7.85		7	6.9	0.9	6.9	0.9		7	6.9	11.5	1.7	2.5	9.2	2.1		7	6.2	7.3	1.5	2.1	6.75	1.8		7	6.2	6.1	3.2	3.9	6.15	3.55		7	26.2	10.8	6.4	4.8	2.1	8.6	3.45	1.8
37	MOR-KI	10	7.7	6.5	12.3	6.4	7.1	9.35		10	9.9	2.9	9.9	2.9		10	8.7	12.6	1.9	1.2	10.65	1.55		10	8.3	7.1	1.9	3.9	7.7	2.9		10	7.5	6.1	6.3	1.3	6.8	3.8		10	27.3	6.3	9.9	2.1	3.9	8.1	3	1.7
29	MOR-KI	12	6.9	6.2	6.4	6.4	6.55	6.4		12	6.1	1.3	6.1	1.3		12	12.1	8.2	4.2	2.5	10.15	3.35		12	8.5	6.6	1.7	2.9	7.55	2.3		12	7.5	9.1	4.3	1.1	8.3	2.7		12	28.5	6.1	8.3	3.7	3.3	7.2	3.5	3.9
						MOR-KI	8.73333	8.26667				MOR-KI	7.75	1.38333						MOR-KI	9.43333	1.675						MOR-KI	8.05833	2.88333						MOR-KI	8.16667	3.06667							MOR-KI	7.775	4.08333	2.31667
[truncated: 28 more columns]

## Sheet: 2j-MOR-KI von-Frey up and down
		20190825	WT MOR-KI littermate										20190825	WT MOR-KI littermate						20190826	WT MOR-KI littermate										20190828	WT MOR-KI littermate										20190830	WT MOR-KI littermate
		Baseline	von-Frey	up and down					up and down		up and down		CFA 2h	von-Frey	up and down			up and down		CFA d1	von-Frey	up and down					up and down				CFA d3	von-Frey	up and down					up and down				CFA d5	von-Frey	up and down					up and down
original No.	genotype	lhp	O and X	threshold	O and X	threshold	rhp	O and X	threshold	O and X	threshold		lhp	O and X	threshold	rhp	O and X	threshold		lhp	O and X	threshold	O and X	threshold	rhp	O and X	threshold	O and X	threshold		lhp	O and X	threshold	O and X	threshold	rhp	O and X	threshold	O and X	threshold		lhp	O and X	threshold	O and X	threshold	rhp	O and X	threshold
9	MOR-KI	1	OOOXXOX	0.774	OOXOOOX	0.781	1	OOOXOXOX	0.949	OOXOOXO	0.59		1	OOOXXOXX	0.566	1	XOOXXX	0.086		1	OOOOXXOXO	0.831	OOOOXOXXO	1.023	1	XOXOXO	0.099	OXXOOX	0.225		1	OOOXXOXO	0.593	OOXOXOO	0.616	1	XOXOOX	0.178	OXXOXO	0.125		1	OOXOXOO	0.616	OOOXOXOO	1.028	1	OXXOXO	0.125
12	WT	2	OOOXOOXX	1.103	OOOXOXXO	0.731	2	OOOXOXOX	0.949	OOOXXOOO	0.833		2	OOOXOOXO	0.843	2	OXXOOX	0.225		2	OOOXXOOO	0.833	OOOXOOXO	0.843	2	OXOXOX	0.283	OXOOXX	0.356		2	OOOXOXOX	0.949	OOOOXOXXO	1.023	2	OOXOXOX	0.437	OOXOXOX	0.437		2	OOOOXOXXO	1.023	OOOXOXOX	0.949	2	OXOXOX	0.283
13	MOR-KI	3	OOOOXXOXX	0.851	OOOXOXOX	0.949	3	OOOXXOOX	0.774	OOOXOOXX	1.103		3	OOOXXOXX	0.566	3	OXOXOX	0.283		3	OOOXOXOO	1.028	OOOXOOXX	1.103	3	OXOOXX	0.356	XOOXOX	0.225		3	OOOXOXOX	0.949	OOOOXXOXO	0.831	3	OXOXOX	0.283	OOXXOXO	0.306		3	OOXOOOX	0.781	OOXOOOX	0.781	3	OXOXOO	0.406
16	WT	4	OOOXOXOO	1.028	OOOOXXOXX	0.851	4	OOXOOOX	0.781	OOOXOXOO	1.028		4	OOOOXXOXX	0.851	4	XOXOXO	0.099		4	OOOOXXXOO	0.962	OOOXXOOX	0.774	4	OXOXOX	0.283	OXOXOO	0.406		4	OOOXOOXO	0.843	OOOOXXOOX	1.162	4	XOXOOX	0.178	OXXOXX	0.086		4	OOOXOXOX	0.949	OOOXOXOX	0.949	4	OOXXOXO	0.306
18	WT	5	OOOOXXOXO	0.831	OOOXOXXO	0.731	5	OOOXOOXX	1.103	OOXOOXO	0.59		5	OOXOOOX	0.781	5	OXXOOX	0.225		5	OOOXOXXO	0.731	OOOXXOOX	0.774	5	OXOXOO	0.406	OXOOXX	0.356		5	OOOXOOXX	1.103	OOOOXXOXX	0.851	5	XOOXOX	0.225	OXOXOX	0.283		5	OOOXOXOO	1.028	OOOXOXXO	0.731	5	OOXOXXO	0.377
24	MOR-KI	6	OOOXOOXX	1.103	OOOXOOXX	1.103	6	OOOOXXOOX	1.162	OOOXOOXX	1.103		6	OOOXOXOX	0.949	6	OXOXXO	0.157		6	OOOXOXXX	0.676	OOOXOXOX	0.949	6	XOOXOX	0.225	OOXXOXO	0.306		6	OOOXXOXX	0.566	OOOXOOXO	0.843	6	OXOXOO	0.406	OXOXOX	0.283		6	OOXOXOO	0.616	OOOOXXOXX	0.851	6	OXOXOO	0.406
26	MOR-KI	7	OOOXXOXO	0.593	OOOOXXOXX	0.851	7	OOXOOOX	0.781	OOOOXXOXX	0.851		7	OOOXOOXX	1.103	7	OXXOOX	0.225		7	OOOOXOXXO	1.023	OOOXXOOX	0.774	7	OOXOXXX	0.266	OXOXOX	0.283		7	OOOOXOXOX	1.425	OOOXOOXO	0.843	7	OXOXOX	0.283	OOXXXOO	0.251		7	OOXOOOX	0.781	OOOXOXOX	0.949	7	OXOOXO	0.42
34	WT	8	OOOXXOOO	0.833	OOOOXXOXX	0.851	8	OOOXOXOX	0.949	OOOXOXXO	0.731		8	OOOXOXXO	0.731	8	OXXOOX	0.225		8	OOOXOXOX	0.949	OOOXOXOX	0.949	8	OOXOXXX	0.266	OOXXOXO	0.306		8	OOOOXXOOX	1.162	OOOOXXOOX	1.162	8	OOXOXOX	0.437	OXOXOX	0.283		8	OOOXOXXO	0.731	OOOXOXOX	0.949	8	OXOXOO	0.406
36	WT	9	OOOXOOXX	1.103	OOOXOXXO	0.731	9	OOOXOXXO	0.731	OOXOOXO	0.59		9	OOOXOXOX	0.949	9	OXOXXX	0.107		9	OOOXOXOX	0.949	OOOXOXOX	0.949	9	OXXOXO	0.125	OXOXXO	0.157		9	OOOXXOOX	0.774	OOXOXOO	0.616	9	OOXXOOX	0.354	OOXXOXX	0.221		9	OOXOOOX	0.781	OOOXOXOX	0.949	9	OXOXOX	0.283
37	MOR-KI	10	OOOOXOXXX	1.015	OOXOOXO	0.59	10	OOOXOXOX	0.949	OOOXOOXX	1.103		10	OOOOXXOXX	0.851	10	OXOXOO	0.406		10	OOXOXOO	0.616	OOOXOXOX	0.949	10	OOXOXXX	0.266	OOXXXOO	0.251		10	OOOXOXXO	0.731	OOXOOOX	0.781	10	OOXOXOX	0.437	OXOXOO	0.406		10	OOOOXXOOX	1.162	OOOXOXOX	0.949	10	OXOXOX	0.283
28	WT	11	OOOOXXOOX	1.162	OOXOOOX	0.781	11	OOOOXOXXO	1.023	OOOXOXOO	1.028		11	OOOXXOXO	0.593	11	XOOXXX	0.086		11	OOXOXOO	0.616	OOOXOXOX	0.949	11	OXOXOX	0.283	OOXOXOX	0.437		11	OOOXOXOX	0.949	OOOXOXOX	0.949	11	OXOXOX	0.283	XOOXXO	0.125		11	OOOXOXXO	0.731	OOOXOXOX	0.949	11	OOXOXOX	0.437
29	MOR-KI	12	OOOOXXOXX	0.851	OOXOOOX	0.781	12	OOOXOXOX	0.949	OOOOXOXOX	1.425		12	OOOXXOOX	0.774	12	OXXOXX	0.086		12	OOOXOXOX	0.949	OOOXXOXO	0.593	12	OXOXOX	0.283	XOOXOX	0.225		12	OOOOXOXXO	1.023	OOOOXOXXO	1.023	12	OOXXOOX	0.354	OXOOXO	0.42		12	OOXOOOX	0.781	OOOOXOXXX	1.015	12	OOXOXOX	0.437
30	WT	13	OOOXOXOX	0.949	OOOXOXXO	0.731	13	OOOXXOXO	0.593	OOOXOOXX	1.103		13	OOOXOOXX	1.103	13	OXXOXO	0.125		13	OOOXXOOO	0.833	OOOXOXXO	0.731	13	OXOXXO	0.157	OOXXXOO	0.251		13	OOOXOXOX	0.949	OOOXOXOX	0.949	13	OOXXOXO	0.306	OOXOXXO	0.377		13	OOOXOXOX	0.949	OOOOXXXOO	0.962	13	OXOXXO	0.157
31	WT	14	OOOXXOOX	0.774	OOOXXOXO	0.593	14	OOOXOOXX	1.103	OOOXOOXX	1.103		14	OOOXXOOX	0.774	14	OXXOXX	0.086		14	OOXOOOX	0.781	OOOXOXXO	0.731	14	OXOXXO	0.157	OXOOXX	0.356		14	OOOXOXXO	0.731	OOOXOXXO	0.731	14	OXOXOX	0.283	OOXOXOX	0.437		14	OOOXXOXX	0.566	OOOXXOOX	0.774	14	OXOXOX	0.283
32	WT	15	OOOXXOOX	0.774	OOOXXOOX	0.774	15	OOXOOOX	0.781	OOOOXXOXX	0.851		15	OOXOOOX	0.781	15	OXOXXO	0.157		15	OOOXOXOX	0.949	OOOXOXOX	0.949	15	OXOXOX	0.283	OXOXXO	0.157		15	OOOXOXXO	0.731	OOOXOOXO	0.843	15	OOXOXOX	0.437	OXOOXX	0.356		15	OOXOOXO	0.59	OOOXOXXO	0.731	15	OOXOOXX	0.543
		Baseline	up and down	up and down									CFA 2h	von-Frey	up and down			up and down		CFA d1	up and down	up and down									CFA d3	up and down	up and down									CFA d5	up and down	up and down
		No.	lhp	rhp									lhp	O and X	threshold	rhp	O and X	threshold		No.	lhp	rhp									No.	lhp	rhp									No.	lhp	rhp
		2	0.917	0.891									2	OOOXOOXO	0.843	2	OXXOOX	0.225		2	0.838	0.3195									2	0.986	0.437									2	0.986	0.3515
		4	0.9395	0.9045									4	OOOOXXOXX	0.851	4	XOXOXO	0.099		4	0.868	0.3445									4	1.0025	0.132									4	0.949	0.363
		5	0.781	0.8465									5	OOXOOOX	0.781	5	OXXOOX	0.225		5	0.7525	0.381									5	0.977	0.254									5	0.8795	0.3665
		8	0.842	0.84									8	OOOXOXXO	0.731	8	OXXOOX	0.225		8	0.949	0.286									8	1.162	0.36									8	0.84	0.406
		9	0.917	0.6605									9	OOOXOXOX	0.949	9	OXOXXX	0.107		9	0.949	0.141									9	0.695	0.2875									9	0.865	0.254
		11	0.9715	1.0255									11	OOOXXOXO	0.593	11	XOOXXX	0.086		11	0.7825	0.36									11	0.949	0.204									11	0.84	0.331
		13	0.84	0.848									13	OOOXOOXX	1.103	13	OXXOXO	0.125		13	0.782	0.204									13	0.949	0.3415									13	0.9555	0.2555
		14	0.6835	1.103									14	OOOXXOOX	0.774	14	OXXOXX	0.086		14	0.756	0.2565									14	0.731	0.36									14	0.67	0.3445
		15	0.774	0.816									15	OOXOOOX	0.781	15	OXOXXO	0.157		15	0.949	0.22									15	0.787	0.3965									15	0.6605	0.5545
			0.851722	0.881667											0.822889			0.148333			0.847333	0.279167										0.915389	0.308056										0.8495	0.3585
		1	0.7775	0.7695									1	OOOXXOXX	0.566	1	XOOXXX	0.086		1	0.927	0.162									1	0.6045	0.1515									1	0.822	0.141
		3	0.9	0.9385									3	OOOXXOXX	0.566	3	OXOXOX	0.283		3	1.0655	0.2905									3	0.89	0.2945									3	0.781	0.413
		6	1.103	1.1325									6	OOOXOXOX	0.949	6	OXOXXO	0.157		6	0.8125	0.2655									6	0.7045	0.3445									6	0.7335	0.406
		7	0.722	0.816									7	OOOXOOXX	1.103	7	OXXOOX	0.225		7	0.8985	0.2745									7	1.134	0.267									7	0.865	0.3515
		10	0.8025	1.026									10	OOOOXXOXX	0.851	10	OXOXOO	0.406		10	0.7825	0.2585									10	0.756	0.4215									10	1.0555	0.252
		12	0.816	1.187									12	OOOXXOOX	0.774	12	OXXOXX	0.086		12	0.771	0.254									12	1.023	0.387									12	0.898	0.407
			0.8535	0.97825											0.8015			0.207167			0.876167	0.250833										0.852	0.311										0.859167	0.328417
[truncated: 54 more columns]

## Sheet: 2mn-nestinki oft
			morphine: 10 mg/ kg, s.c.
	10 min 40*40 cm box
				baseline		after morphine +40 min		Experiment date	Mouse NO. in analysis excel
	DOB	Mouse NO.	GENOTYPE	distance	speed	distance	speed
	5/31/17	34	cre+, ki-/-	5222.1	13.2	13308.7	25.4	20180731	mouse 19
		36	cre+, ki-/-	5990.2	14.1	14996.9	27		mouse 17
	6/8/17	42	cre-, ki+/-	6394.3	15.1	11559.2	23.5		mouse 18
		43	cre-, ki+/-	2749.3	10.6	11935.6	24.9		mouse 16
	6/20/17	56	cre-, ki+/-	4588.6	13.1	10999	22.1	20170821
		60	cre+, ki-/-	4936	13.5	12677.2	25.2
		59	cre+, ki-/-	5256.5	14.3	12841.3	25.4
		57	cre-, ki+/-	4251.6	12.5	8127.4	18.6
		67	cre-, ki+/-	4733	13.4	10725.7	23.6
		61	cre-, ki+/-	4629.6	12.5	11168.3	22.8
	6/22/17	51	cre-, ki-/-	4385.4	14.6	3068	12.9
		47	cre-, ki+/-	3949.4	12.5	12376.5	26
		48	cre-, ki+/-	3902.3	12.8	10842.1	23.5
		52	cre+, ki-/-	6121.5	15.6	11868.5	24.1
	6/30/17	72	cre-, ki-/-	2201.3	10.7	1656.8	10.5	folder 20170912	mouse 9
		68	cre+, ki-/-	3523.3	13.2	12060.4	23.4		mouse 14
		69	cre+, ki-/-	2356.7	12.2	10704.5	26.8		mouse 13
		70	cre-, ki+/-	2982.5	13	7176.3	23.3		mouse 11
		66	cre-, ki-/-	2616	11.2	2526.1	12.5		mouse 12
		71	cre-, ki-/-			1676.5	10.4		mouse 10
	7/5/17 & 7/8/17	73	cre-, ki+/-	2406.5	10.7	15531	30.4		mouse 16
		74	cre-, ki-/-	4030.2	12.9	2436	13.6		mouse 19
		80	cre-, ki-/-	2672.6	10.6	2133	13.4		mouse 18
		76	cre-, ki-/-	3220.2	11.7	1846.3	11.5		mouse 17
		75	cre-, ki+/-	4101.4	14.9	15884.7	33		mouse 15
	7/15/17	77	cre-, ki+/-	4832.2	13.5	8190.1	17.7		mouse 1
		78	cre+, ki-/-	4402.4	13.7	9272.8	18.8		mouse 2
		79	cre-, ki-/-	3226.4	12	3017.2	10.5		mouse 3
		80	cre+, ki-/-	4715.6	13.5	10984.9	22.3		mouse 4
	7/10/17	75	cre-, ki-/-	4949.4	13.3	4979.8	13.3		mouse 5
		76	cre+, ki-/-			9249.8	20		mouse 6
		74	cre+, ki-/-	4350.8	12.4	8440.6	19.3		mouse 7
		73	cre+, ki-/-	3485	11.7	7003.3	18.3		mouse 8

## Sheet: 2o-nestinki s.c. tail immersion
		50 ℃ tail immersion, cut-off: 20 s
		morphine: 10 mg/ kg, s.c.
				withdrawal latency (s)
Experiment date	DOB	Mouse NO.	GENOTYPE	baseline			after Morphine +40 min		baseline average	after average	%MPE
2017818	6/20/17	56	cre-, ki+/-	2.84	2.97	3.13	20	20	2.98	20	100
		60	cre+, ki-/-	2.16	2.8	2.65	5.38	9.97	2.53667	7.675	29.4236
		59	cre+, ki-/-	2.75	2.13	2.65	20	20	2.51	20	100
		57	cre-, ki+/-	3.5	2.62	2.28	20	20	2.8	20	100
		67	cre-, ki+/-	2.13	2.56	2.18	5.25	6.35	2.29	5.8	19.8193
		61	cre-, ki+/-	2.65	3.07	3.03	7.47	7.06	2.91667	7.265	25.4537
	6/22/17	51	cre-, ki-/-	2.63	2.53	2.21	2.75	2.4	2.45667	2.575	0.67452
		47	cre-, ki+/-	2.13	2.5	1.97	6.94	4.28	2.2	5.61	19.1573
		48	cre-, ki+/-	2.47	2.51	3.28	20	20	2.75333	20	100
		52	cre+, ki-/-	2.28	2.82	3.84	20	20	2.98	20	100
20170908	6/30/17	72	cre-, ki-/-	2.69	2.28	3.22	2.47	3.56	2.73	3.015	1.65026
		68	cre-, ki-/-	3.18	2.84	2.79	20	20	2.93667	20	100
		69	cre+, ki-/-	2.81	2.85	3.65	20	20	3.10333	20	100
		70	cre-, ki+/-	2.72	2.41	3.03	20	20	2.72	20	100
		66	cre-, ki-/-	2.69	3.75	3.31	3.1	3.06	3.25	3.08	-1.01493
		71	cre-, ki-/-	3	2.85	2.5	3.03	3.23	2.78333	3.13	2.01355
	7/5/17 & 7/8/17	73	cre-, ki+/-	2.57	2.78	2.88	20	20	2.74333	20	100
		74	cre-, ki-/-	2.88	1.65	2.6	3.62	3.43	2.37667	3.525	6.51598
		80	cre-, ki-/-	2.16	2.5	2.5	2.75	2.78	2.38667	2.765	2.14799
		76	cre-, ki-/-	2.75	3.85	3.75	2.65	3.75	3.45	3.2	-1.51057
		75	cre-, ki+/-	2.56	2.69	2.63	20	20	2.62667	20	100
20170919	7/15/17	77	cre-, ki+/-	2.44	2.9	3.18	20	20	2.84	20	100
		78	cre+, ki-/-	2.72	2.5	3.38	20	20	2.86667	20	100
		79	cre-, ki-/-	4.5	3.54	3.65	3.97	5.16	3.89667	4.565	4.15028
		80	cre+, ki-/-	2.19	2.78	2.15	20	20	2.37333	20	100
	7/10/17	75	cre-, ki-/-	3.44	2.72	3	3.19	3.33	3.05333	3.26	1.21951
		76	cre+, ki-/-	2.37	3.28	3.32	20	20	2.99	20	100
		74	cre+, ki-/-	2.62	3.25	3.37	20	20	3.08	20	100
		73	cre+, ki-/-	4	4.78	3.9	20	20	4.22667	20	100

## Sheet: 2p-nestinki s.c. hot plate
		52 ℃ hot plate, cut-off: 45 s
		morphine: 10 mg/ kg, s.c.
				withdrawal latency (s)
Experiment date	DOB	Mouse NO.	GENOTYPE	baseline		after Morphine +40 min		baseline average	after average	%MPE		weight(g)
20170818	6/20/17	56	cre-, ki+/-	21.8	18.7	45	24.3	20.25	34.65	58.1818		28.7
		60	cre+, ki-/-	20.8	20.2	45	30.7	20.5	37.85	70.8163		24.6
		59	cre+, ki-/-	20.3	23.7	45	45	22	45	100		25.6
		57	cre-, ki+/-	21.2	24.5	45	38.9	22.85	41.95	86.2302		29.2
		67	cre-, ki+/-	23.1	22.6	29.5	18.6	22.85	24.05	5.41761		26.9
		61	cre-, ki+/-	18.3	13.9	42.9	21	16.1	31.95	54.8443		27.4
	6/22/17	51	cre-, ki-/-	15.8	15.7	20.8	25.6	15.75	23.2	25.4701		25.3
		47	cre-, ki+/-	23.3	26.7	40.6	39.5	25	40.05	75.25		27.8
		48	cre-, ki+/-	26.2	23.9	45	45	25.05	45	100		27.1
		52	cre+, ki-/-	24	18.1	38.6	39.8	21.05	39.2	75.7829		24.2
20170908	6/30/17	72	cre-, ki-/-	14.9	11.9	13.7	15.1	13.4	14.4	3.16456		32
		68	cre+, ki-/-	17	22.8	44	38.4	19.9	41.2	84.8606		28.8
		69	cre+, ki-/-	23.6	15.6	45	34.2	19.6	39.6	78.7402		27.7
		70	cre-, ki+/-	14.8	23.4	39.8	40.4	19.1	40.1	81.0811		29.9
		66	cre-, ki-/-	16.2	12.6	21	21.2	14.4	21.1	21.8954		29.7
		71	cre-, ki-/-	16.6	14.6	11.6	15	15.6	13.3	-7.82313		33.9
	7/5/17 & 7/8/17	73	cre-, ki+/-	14.6	11.4	16.4	19.6	15.5	18	8.47458		27.2
		74	cre-, ki-/-	21.8	17.4	22.2	24.2	21.4	23.2	7.62712		30.3
		80	cre-, ki-/-	19.4	22	25.3	20.6	21.825	22.95	4.85437		31.2
		76	cre-, ki-/-	17	13.8	15.1	14.7	15.15	14.9	-0.837521		29.3
		75	cre-, ki+/-	15	16.4	36.5	27.1	23.75	31.8	37.8824		29.8
20170919	7/15/17	77	cre-, ki+/-	14.4	14.6	23.9	35.7	22.15	29.8	33.4792		30.4
		78	cre+, ki-/-	15.3	19.3	25.5	26.7	21.7	26.1	18.8841		30.3
		79	cre-, ki-/-	12.7	13.8	13.3	17.7	14.375	15.5	3.67347		26.8
		80	cre+, ki-/-	14.4	12.2	25.3	24.5	19.1	24.9	22.3938		20
	7/10/17	75	cre-, ki-/-	21.5	24.1	18.9	23.5	22	21.2	-3.47826		26.8
		76	cre+, ki-/-	20.6	18.7	44.9	43.5	31.925	44.2	93.8815		25.6
		74	cre+, ki-/-	17	12.2	10.3	21.5	15.25	15.9	2.18487		25.6
		73	cre+, ki-/-	19.8	12.2	31.8	39.8	25.9	35.8	51.8325		25.6

## Sheet: 2-s1b nestin ki DAB summary
	wt4-122	122 nestin	wt4-130	130 nestin	wt5-123	123 nestin	average	average		wt4-122	wt4-130	wt5-123		122 nestin	130 nestin	123 nestin
striatum	12.2595	14.1364	12.624	13.6719	12.0789	12.4858	12.3208	13.4314		0.995026	1.02461	0.980364		1.14736	1.10966	1.0134
NAc	13.0783	14.1382	13.2401	15.1052	11.3886	13.5103	12.569	14.2513		1.04052	1.05339	0.906086		1.12485	1.20178	1.07489
Habenula	11.6161	10.9579	13.8958	13.9384	11.5674	10.789	12.3598	11.8951		0.939832	1.12428	0.935891		0.886578	1.12772	0.872913
CM	17.6532	16.8518	19.532	23.8272	19.0644	17.6766	18.7499	19.4519		0.941511	1.04171	1.01678		0.898769	1.27079	0.942759
CeA	9.7774	9.2898	11.0077	11.209	9.15188	9.4476	9.97899	9.98213		0.979798	1.10309	0.917114		0.930936	1.12326	0.946749
LH	14.356	9.90583	15.6728	11.7812	12.8521	10.9881	14.2936	10.8917		1.00436	1.09649	0.899148		0.693023	0.82423	0.768743
IPN	30.0177	23.362	27.6513	26.9113	21.1167	25.5827	26.2619	25.2853		1.14301	1.05291	0.80408		0.889578	1.02473	0.974137
PB	15.1693	10.6995	15.8198	9.66783	13.8118	13.6185	14.9337	11.3286		1.01578	1.05934	0.924879		0.716468	0.647385	0.911933
PAG	6.96725	5.834	9.678	7.712	8.32325	8.94925	8.32283	7.49842		0.837125	1.16283	1.00005		0.700963	0.926608	1.07526

[truncated: 6 more sheets: wt4-122, nestinki-122, wt4-130, nestinki-130, wt5-123, nestinki-123]
