# Supplementary material for: Different neuronal populations mediate inflammatory pain analgesia by exogenous and endogenous opioids
Source: eLife. 2020 Jun 10;9:e55289. doi: 10.7554/eLife.55289 (PMC7311172; doi:10.7554/eLife.55289)
Supplement: Figure 3—source data 1. [file elife-55289-fig3-data1.xlsx]

## Sheet: 3c-DAB vglut2ki summary
	wt2-170	170 vglut2ki	wt6-164	164-vglut2ki	wt3-175	175-vglut2ki	average	average		wt2-170	wt6-164	wt3-175		170 vglut2ki	164-vglut2ki	175-vglut2ki
Habenula	9.95189	7.44908	12.8344	16.3284	9.88717	7.81933	10.8912	10.5323		0.913759	1.17842	0.907816		0.683957	1.49924	0.717953
CM	12.2796	10.116	23.3416	24.9438	10.66	9.9685	15.4271	15.0094		0.795978	1.51303	0.690993		0.655731	1.61689	0.64617
PB	10.7777	8.78883	14.2469	18.6755	11.0932	6.76975	12.0392	11.4114		0.895212	1.18337	0.921418		0.730016	1.55122	0.562308

## Sheet: DAB wt2-170
		area	mean	Min	Max		Maxthreshold
habenula-1	image 06	640238	239.157	49	255	0	255		13.374			image 06	640238	252.531	228	255	0	255
habenula-2		640238	240.487	65	255	0	255		12.044			image 07	640228	252.585	229	255	0	255
habenula-3	image 07	640228	243.524	57	255	0	255		9.061			image 08	640220	252.595	203	255	0	255
habenula-4	image 08	640220	244.835	71	255	0	255		7.76			image 09	640229	252.637	243	255	0	255
habenula-5		640220	243.557	47	255	0	255		9.038			image 10	640192	252.618	242	255	0	255
habenula-6	image 09	640229	243.414	48	255	0	255		9.223			image 15	640198	252.626	228	255	0	255
habenula-7		640229	243.385	68	255	0	255		9.252			image 16	640186	252.58	242	255	0	255
habenula-8	image 10	640192	243.858	69	255	0	255		8.76			image 17	640236	252.608	223	255	0	255
habenula-9		640192	241.563	57	255	0	255		11.055			image 18	640159	252.591	242	255	0	255
									9.95189
CM-1	image 06	640238	239.185	64	255	0	255		13.346
CM-2	image 07	640228	240.78	43	255	0	255		11.805
CM-3	image 08	640220	244.127	82	255	0	255		8.468
CM-4	image 09	640229	238.878	135	255	0	255		13.759
CM-5	image 10	640192	238.598	46	255	0	255		14.02
									12.2796
PB-1	image 15	640198	241.996	70	255	0	255		10.63
PB-2		640198	241.332	84	255	0	255		11.294
PB-3	image 16	640186	242.092	77	255	0	255		10.488
PB-4		640186	243.167	52	255	0	255		9.413
PB-5	image 17	640236	241.618	51	255	0	255		10.99
PB-6	image 18	640159	240.74	98	255	0	255		11.851
									10.7777

## Sheet: DAB vglut2ki-170
		area	mean	Min	Max		Maxthreshold
habenula-1	image 17	640227	245.226	62	255	0	255		7.345			image 17	640227	252.571	181	255	0	255
habenula-2		640227	245.673	55	255	0	255		6.898			image 22	640229	252.568	216	255	0	255
habenula-3	image 22	640229	247.131	41	255	0	255		5.437			image 23	640194	252.601	210	255	0	255
habenula-4		640229	246.032	72	255	0	255		6.536			image 24	640221	252.615	243	255	0	255
habenula-5	image 23	640194	242.471	36	255	0	255		10.13			image 25	640199	252.596	243	255	0	255
habenula-6		640194	241.674	70	255	0	255		10.927			image 26	640235	252.589	243	255	0	255
habenula-7	image 24	640221	245.941	50	255	0	255		6.674			image 09	640190	252.603	124	255	0	255
habenula-8		640221	245.321	87	255	0	255		7.294			image 10	640231	252.594	90	255	0	255
habenula-9	image 25	640199	246.194	45	255	0	255		6.402			image 11	640185	252.574	156	255	0	255
habenula-10		640199	245.634	79	255	0	255		6.962
habenula-11	image 26	640235	245.703	43	255	0	255		6.886
habenula-12		640235	244.691	37	255	0	255		7.898
									7.44908
CM-1	image 17	640227	243.36	56	255	0	255		9.211
CM-2	image 22	640229	241.811	60	255	0	255		10.757
CM-3	image 23	640194	241.31	59	255	0	255		11.291
CM-4	image 24	640221	245.096	91	255	0	255		7.519
CM-5	image 25	640199	242.947	165	255	0	255		9.649
CM-6	image 26	640235	240.32	59	255	0	255		12.269
									10.116
PB-1	image 09	640190	243.545	107	255	0	255		9.058
PB-2		640190	244.033	30	255	0	255		8.57
PB-3	image 10	640231	243.284	46	255	0	255		9.31
PB-4		640231	241.675	56	255	0	255		10.919
PB-5	image 11	640185	244.935	68	255	0	255		7.639
PB-6		640185	245.337	36	255	0	255		7.237
									8.78883

## Sheet: DAB wt6-164
		area	mean	Min	Max		Maxthreshold
habenula-1	image 06	640488	238.63	39	255	0	255		14.044			image 06	640488	252.674	64	255	0	255
habenula-2	image 07	640438	239.416	37	255	0	255		13.225			image 07	640438	252.641	133	255	0	255
habenula-3	image 08	640516	240.113	40	255	0	255		12.548			image 08	640516	252.661	146	255	0	255
habenula-4		640516	241.538	42	255	0	255		11.123			image 09	640449	252.765	196	255	0	255
habenula-5	image 09	640449	238.65	40	255	0	255		14.115			image 10	640493	252.67	166	255	0	255
habenula-6		640449	241.561	40	255	0	255		11.204			image 11	640434	252.753	183	255	0	255
habenula-7	image 10	640493	240.895	38	255	0	255		11.775			image 17	640465	252.422	199	255	0	255
habenula-8		640493	242.892	39	255	0	255		9.778			image 18	640408	252.784	106	255	0	255
habenula-9	image 11	640434	238.006	41	255	0	255		14.747			image 19	640385	252.752	92	255	0	255
habenula-10		640434	236.968	38	255	0	255		15.785			image 20	640421	252.716	95	255	0	255
									12.8344
CM-1	image 07	640438	224.881	42	255	0	255		27.76
CM-2	image 08	640516	233.643	46	255	0	255		19.018
CM-3	image 09	640449	230.319	44	255	0	255		22.446
CM-4	image 10	640493	228.909	93	255	0	255		23.761
CM-5	image 11	640434	229.03	47	255	0	255		23.723
CM-6									23.3416
PB-1	image 17	640465	236.708	36	255	0	255		15.714
PB-2		640465	233.931	41	255	0	255		18.491
PB-3	image 18	640408	237.415	39	255	0	255		15.369
PB-4		640408	242.296	33	255	0	255		10.488
PB-5	image 19	640385	240.452	35	255	0	255		12.3
PB-6		640385	239.187	42	255	0	255		13.565
PB-7	image 20	640421	238.915	42	255	0	255		13.801
									14.2469

## Sheet: DAB vglut2ki-164
		area	mean	Min	Max		Maxthreshold
habenula-1	image 09	640446	237.01	43	255	0	255		15.7			image 09	640446	252.71	179	255	0	255
habenula-2		640446	239.086	34	255	0	255		13.624			image 10	640496	252.774	237	255	0	255
habenula-3	image 10	640496	239.509	40	255	0	255		13.265			image 12	640460	252.794	240	255	0	255
habenula-4		640496	237.403	48	255	0	255		15.371			image 13	640421	252.787	52	255	0	255
habenula-5	image 12	640460	238.097	43	255	0	255		14.697			image 14	640438	252.668	112	255	0	255
habenula-6		640460	235.865	41	255	0	255		16.929			image 15	640504	252.769	232	255	0	255
habenula-7	image 13	640421	235.394	38	255	0	255		17.393			image 01	640418	252.72	68	255	0	255
habenula-8	image 14	640438	233.755	37	255	0	255		18.913			image 02	640446	252.76	112	255	0	255
habenula-9	image 15	640504	231.966	51	255	0	255		20.803			image 03	640391	252.341	104	255	0	255
habenula-10		640504	236.18	37	255	0	255		16.589
									16.3284
CM-1	image 09	640446	229.429	67	255	0	255		23.281
CM-2	image 10	640496	228.592	38	255	0	255		24.182
CM-3	image 12	640460	229.75	80	255	0	255		23.044
CM-4	image 13	640421	228.522	48	255	0	255		24.265
CM-5	image 14	640438	226.005	35	255	0	255		26.663
CM-6	image 15	640504	224.541	51	255	0	255		28.228
									24.9438
PB-1	image 01	640418	232.793	54	255	0	255		19.927
PB-2		640418	233.731	37	255	0	255		18.989
PB-3	image 02	640446	234.288	43	255	0	255		18.472
PB-4		640446	237.23	53	255	0	255		15.53
PB-5	image 03	640391	232.54	39	255	0	255		19.801
PB-6		640391	233.007	40	255	0	255		19.334
									18.6755

## Sheet: DAB wt3-175
		area	mean	Min	Max		Maxthreshold
habenula-1	image 08	640239	241.933	45	255	0	255		10.707			image 08	640239	252.64	224	255	0	255
habenula-2		640239	242.429	45	255	0	255		10.211			image 09	640246	252.65	34	255	0	255
habenula-3	image 09	640246	243.059	54	255	0	255		9.591			image 11	640238	252.615	240	255	0	255
habenula-4		640246	243.894	38	255	0	255		8.756			image 12	640183	252.65	242	255	0	255
habenula-5	image 11	640238	242.367	38	255	0	255		10.248			image 13	640170	252.637	238	255	0	255
habenula-6		640238	241.987	32	255	0	255		10.628			image 14	640180	252.616	191	255	0	255
habenula-7	image 12	640183	242.586	45	255	0	255		10.064			image 16	640216	252.655	229	255	0	255
habenula-8		640183	243.137	32	255	0	255		9.513			image 17	640174	252.614	243	255	0	255
habenula-9	image 13	640170	241.075	34	255	0	255		11.562			image 19	640202	252.616	242	255	0	255
habenula-10		640170	243.161	47	255	0	255		9.476
habenula-11	image 14	640180	243.084	52	255	0	255		9.532
habenula-12		640180	244.258	66	255	0	255		8.358
									9.88717
CM-1	image 08	640239	239.288	73	255	0	255		13.352
CM-2	image 09	640246	240.942	39	255	0	255		11.708
CM-3	image 12	640183	243.814	89	255	0	255		8.836
CM-4	image 13	640170	241.171	44	255	0	255		11.466
CM-5	image 14	640180	244.678	53	255	0	255	?	7.938
CM-6									10.66
PB-1	image 16	640216	243.905	73	255	0	255		8.75
PB-2		640216	243.541	86	255	0	255		9.114
PB-3	image 17	640174	241.044	86	255	0	255		11.57
PB-4		640174	239.04	51	255	0	255		13.574
PB-5	image 19	640202	240.218	58	255	0	255		12.398
PB-6		640202	241.463	44	255	0	255		11.153
									11.0932

## Sheet: DAB vglut2ki-175
		area	mean	Min	Max		Maxthreshold
habenula-1	image 13	640199	244.922	38	255	0	255		7.715			image 13	640199	252.637	240	255	0	255
habenula-2		640199	245.49	51	255	0	255		7.147			image 14	640255	252.612	242	255	0	255
habenula-3	image 14	640255	243.454	38	255	0	255		9.158			image 15	640234	252.615	154	255	0	255
habenula-4		640255	243.674	52	255	0	255		8.938			image 17	640230	252.643	242	255	0	255
habenula-5	image 15	640234	245.282	52	255	0	255		7.333			image 18	640191	252.682	73	255	0	255
habenula-6		640234	244.559	56	255	0	255		8.056			image 19	640165	252.604	243	255	0	255
habenula-7	image 17	640230	242.947	32	255	0	255		9.696			image 01	640241	252.65	219	255	0	255
habenula-8		640230	243.188	49	255	0	255		9.455			image 02	640241	252.602	233	255	0	255
habenula-9	image 18	640191	246.206	34	255	0	255		6.476			image 05	640241	252.602	233	255	0	255
habenula-10		640191	245.425	62	255	0	255		7.257			image 06	640213	252.608	233	255	0	255
habenula-11	image 19	640165	245.883	66	255	0	255		6.721
habenula-12		640165	246.724	69	255	0	255		5.88
									7.81933
CM-1	image 13	640199	242.775	119	255	0	255		9.862
CM-2	image 14	640255	241.901	78	255	0	255		10.711
CM-3	image 15	640234	244.904	103	255	0	255		7.711
CM-4	image 17	640230	241.251	54	255	0	255		11.392
CM-5	image 18	640191	241.144	47	255	0	255		11.538
CM-6	image 19	640165	244.007	88	255	0	255		8.597
									9.9685
PB-1	image 01	640241	245.973	42	255	0	255		6.677
PB-2		640241	245.736	72	255	0	255		6.914
PB-3	image 02	640241	245.066	37	255	0	255		7.536
PB-4		640241	245.533	41	255	0	255		7.069
PB-5	image 05	640241	245.066	37	255	0	255		7.536
PB-6		640241	245.533	41	255	0	255		7.069
PB-7	image 06	640213	246.031	82	255	0	255		6.577
PB-8		640213	247.828	132	255	0	255		4.78
									6.76975

## Sheet: 3d-vglut2ki s.c. tail immersion
				s.c. 10mg/kg morphine			50du tail immersion
vglut2-cre/MOR-KI
Time	Mouse NO.	DOB	baseline		average	5	15	30	45	60	90	120	150	180	240
20171113	59	8/7/17 8/13/17	3.88	3.62	3.75	4.62	6.6	6.6	6.5	7.97	7.15	5.28	4.19	3.84	4
	58		4.46	3.02	3.74	3.66	4.32	3.22	3.56	3.66	3.74	4.03	2.97	4.22	4.09
	55		3.78	3.22	3.5	3.34	3.87	4.28	3.59	4.06	4.68	4.46	3.82	4.05	3.29
	56		3.72	4.36	4.04	3.75	3.07	4.41	4.5	4	3.44	3.28	3.48	3.88	3.75
	60		4.56	3	3.78	4.06	3.25	4.38	3.18	4.07	3.15	3.3	3.34	4.21	3.06
	57		3.21	3.11	3.16	4.72	6.27	7.16	6.96	8.4	8.43	6.52	5.06	3.31	3.78
20171122	71	8/22/17	4.38	3.42	3.9	3.41	3.34	3.76	4.18	4.08	3.65	3.72	4.25	3.59	4.5
	70		4.02	3.85	3.935	3.62	4.62	4.61	4.59	4.16	4.1	4.53	5.03	3.97	3.23
	61		4.16	4.09	4.125	5.19	7.01	10.01	7.59	5.19	5.94	7.11	5.49	4.24	4.09
	69		4.3	4.46	4.46	4.39	4.56	3.78	4.33	4.56	4.66	4.21	4.03	3.59	3.69
	68		4.56	4.03	4.295	5.09	7.04	8.97	8.4	7.89	8.22	5.49	7.28	5.34	3.97
	62	8/23/17	4.27	4.33	4.3	4.25	3.63	3.88	4.42	4.82	4.4	4.13	4.71	4.01	3.87
	65		4.52	4.02	4.27	5.45	6.6	6.52	8.5	5.53	6.21	6.63	6.88	5.62	4.37
	64		4.28	3.82	4.05	6.96	6.79	8.62	7.15	6.33	6.28	5.04	5.28	4.62	4.11
	67		4.01	4.45	4.23	4.72	4	4.31	4.11	3.7	3.91	4.87	3.97	4.25	4.34
	63		4.03	4.21	4.12	3.91	4.12	4.16	4.34	4.31	4.03	4.94	4.74	3.98	3.95
	66		3.65	4.05	3.85	6.56	9.97	11.46	9.44	8.12	9.03	6.06	6.54	5.17	4.13
20171208	73	9/20/17	3.37	3.25	3.31	3.65	3.31	3.36	3.64	4.09	4.08	4.29	3.55	3.13	3.9
	75		4.72	3.78	4.25	4.43	7.45	9.75	7.34	8.97	9.18	7.61	4.86	5.36	4.75
	72		3.94	4.52	4.23	5.94	8.37	8.18	7.66	8.35	7.53	7.55	5.4	3.91	4.87
	76		4.58	4.22	4.4	4.62	6.06	7.06	9.65	7.34	10.82	8.29	6.08	4.9	4.81
	74		4.28	4.08	4.18	4.38	3.91	4	4.09	3.93	4.27	3.66	3.86	4.59	4.18
%MPE
	59					5.35385	17.5385	17.5385	16.9231	25.9692	20.9231	9.41538	2.70769	0.553846	1.53846
	58					-0.492005	3.56704	-3.19803	-1.10701	-0.492005	0	1.78352	-4.73555	2.95203	2.15252
	55					-0.969697	2.24242	4.72727	0.545455	3.39394	7.15152	5.81818	1.93939	3.33333	-1.27273
	56					-1.81704	-6.07769	2.3183	2.88221	-0.250627	-3.7594	-4.7619	-3.50877	-1.00251	-1.81704
	60					1.72626	-3.26757	3.69914	-3.69914	1.78792	-3.88409	-2.95931	-2.7127	2.65105	-4.43896
	57					9.26366	18.4679	23.753	22.5653	31.1164	31.2945	19.9525	11.2827	0.890736	3.68171
	71					-3.04348	-3.47826	-0.869565	1.73913	1.11801	-1.5528	-1.11801	2.17391	-1.92547	3.72671
	70					-1.96078	4.26393	4.20168	4.07719	1.40056	1.02708	3.7037	6.81606	0.217865	-4.38842
	61					6.70866	18.1732	37.0709	21.8268	6.70866	11.4331	18.8031	8.59843	0.724409	-0.220472
	69					-0.45045	0.643501	-4.3758	-0.836551	0.643501	1.287	-1.60875	-2.76705	-5.59846	-4.95495
	68					5.06208	17.4785	29.7676	26.1382	22.8908	24.992	7.60904	19.0067	6.65393	-2.0694
	62					-0.318471	-4.26752	-2.67516	0.764331	3.3121	0.636943	-1.0828	2.61146	-1.84713	-2.73885
	65					7.50159	14.8125	14.3039	26.8913	8.01017	12.3331	15.0032	16.5925	8.58233	0.635728
	64					18.2445	17.1787	28.652	19.4357	14.2947	13.9812	6.2069	7.7116	3.57367	0.376176
	67					3.10717	-1.45847	0.507292	-0.760938	-3.36081	-2.02917	4.05834	-1.6487	0.126823	0.697527
	63					-1.32242	0	0.251889	1.38539	1.19647	-0.566751	5.16373	3.90428	-0.881612	-1.07053
	66					16.7802	37.8947	47.1207	34.613	26.4396	32.0743	13.6842	16.6563	8.17337	1.73375
	73					2.03715	0	0.299581	1.97723	4.67346	4.61354	5.87178	1.43799	-1.07849	3.53505
	75					1.14286	20.3175	34.9206	19.619	29.9683	31.3016	21.3333	3.87302	7.04762	3.1746
	72					10.8434	26.2524	25.0476	21.7502	26.1256	20.9258	21.0526	7.41915	-2.02917	4.05834
	76					1.41026	10.641	17.0513	33.6538	18.8462	41.1538	24.9359	10.7692	3.20513	2.62821
	74					1.26422	-1.7067	-1.1378	-0.5689	-1.58028	0.5689	-3.28698	-2.02276	2.59166	0

## Sheet: 3e-vglut2ki s.c. hot plate
vglut2-cre/MOR-KI				s.c. 10mg/kg morphine			52du hot plate
Time	Mouse NO.	DOB	baseline		average	15	30	60	90	120	180	240
20171205	58	8/7/17 8/13/17	25.8	14.9	20.35	16.8	20.5	21.5	24.9	17	17.9	21.4
	57		13.1	11.6	12.35	24.8	45	45	40.2	45	28.6	11.7
	59		13.1	19.5	16.3	18.2	32.1	45	45	45	27.2	23.8
	60		15.5	16.9	16.2	19.7	22	14.8	22.3	26.8	21.9	21.2
	55		22.2	13.5	17.85	16.2	20.4	15.7	14.9	18	15.3	17.1
	56		20.3	24.2	22.25	22.9	17.7	20.5	20	16.7	18.8	17.6
20171206	62	8/22/17	27.4	10.8	19.1	17.1	21.7	23.9	17	17	20.1	13.5
	63		23.2	18.8	21	14.6	14.4	22.5	17.4	18.1	23.5	18.9
	64		21.7	20.7	21.2	18.7	21.2	24	15.8	16.7	18.4	22.1
	66		16.6	14.9	15.75	18.6	14.5	23.6	17	18.5	14	24.1
	67		19.9	16.1	18	12.5	10.74	13	18.4	15.9	16.4	11.2
	65		18.8	16.6	17.7	15.4	18.7	30	32.6	28.9	34.4	23.7
20171208	73	9/20/17	11.7	25.1	18.4	21.5	24	13.7	9.8	24.1	22.4	18.4
	75		24.2	17	20.6	25.6	32.7	45	45	45	37.7	29.3
	72		24.1	20.3	22.2	26.9	18.7	44.4	45	38.5	45	16.4
	76		11.8	15.6	13.7	19.6	26.1	37	24.9	27.9	21	15.4
	74		17.8	13.6	15.7	13	15.4	18.8	20.8	10.3	9.6	9.6
%MPE
	58					-14.4016	0.608519	4.66531	18.4584	-13.5903	-9.93915	4.25963
	57					38.1317	100	100	85.2986	100	49.7703	-1.99081
	59					6.62021	55.0523	100	100	100	37.9791	26.1324
	60					12.1528	20.1389	-4.86111	21.1806	36.8056	19.7917	17.3611
	55					-6.07735	9.39227	-7.91897	-10.8656	0.552486	-9.39227	-2.76243
	56					2.85714	-20	-7.69231	-9.89011	-24.3956	-15.1648	-20.4396
	62					-7.72201	10.0386	18.5328	-8.10811	-8.10811	3.861	-21.6216
	63					-26.6667	-27.5	6.25	-15	-12.0833	10.4167	-8.75
	64					-10.5042	0	11.7647	-22.6891	-18.9076	-11.7647	3.78151
	66					9.74359	-4.2735	26.8376	4.2735	9.40171	-5.98291	28.547
	67					-20.3704	-26.8889	-18.5185	1.48148	-7.77778	-5.92593	-25.1852
	65					-8.42491	3.663	45.0549	54.5788	41.0256	61.1722	21.978
	73					11.6541	21.0526	-17.6692	-32.3308	21.4286	15.0376	0
	75					20.4918	49.5902	100	100	100	70.082	35.6557
	72					20.614	-15.3509	97.3684	100	71.4912	100	-25.4386
	76					18.8498	39.6166	74.4409	35.7827	45.3674	23.3227	5.43131
	74					-9.21502	-1.02389	10.5802	17.4061	-18.43	-20.8191	-20.8191

## Sheet: 3f-vglut2KI von frey s.c. m
mouse no.	0.07		0.16		0.4		0.6		1		1.4
82	0	0	0	0	2	0	5	2	5	3	5	2
79	0	0	1	1	1	3	3	3	4	3	5	5
77	0	0	0	1	2	2	4	4	5	5	5	5
81	0	0	1	1	2	1	3	3	5	5	5	5
84	0	0	1	0	3	1	4	2	4	3	5	2
78	0	0	0	0	3	0	4	2	5	2	5	4
85	0	0	1	1	2	1	4	2	5	4	5	4
83	0	0	1	0	2	0	4	1	5	2	5	4
86	0	0	1	0	2	1	4	2	5	5	5	3
80	0	0	1	0	2	1	3	2	5	2	5	3
75	0	0	1	0	1	1	2	1	3	2	5	2
76	0	0	1	0	1	0	3	0	4	3	5	4
72	0	0	1	0	1	1	4	2	5	2	5	4
74	0	0	1	1	3	2	4	4	4	4	5	5
73	0	0	1	0	3	3	4	5	5	5	5	5

[truncated: 14 more sheets: 3gh-Vglut2-cre MOR-KI formalin, 3i-vglut2ki Hargreaves morphine, 3j-vglut2ki von-Frey morphine, 3k-vglut2ki Hargreaves, 3l-vglut2ki vonFrey up and down, 3-s1c, 3-s1d, 3-s1e, 3-s1hi, 3-s2c vglut2flx s.c. tail immer, 3-s2d vglut2flx s.c. hot plate, 3-s2e vglut2flx s.c. von frey, 3-s2f vglut2flx Hargreaves, 3-s2g vglut2flx von-Frey]
