# Supplementary material for: Different neuronal populations mediate inflammatory pain analgesia by exogenous and endogenous opioids
Source: eLife. 2020 Jun 10;9:e55289. doi: 10.7554/eLife.55289 (PMC7311172; doi:10.7554/eLife.55289)
Supplement: Figure 4—source data 1. [file elife-55289-fig4-data1.xlsx]

## Sheet: 4c-DAB vgatki summary
	wt1-153	153 vgatki	wt2-154	154 vgatki	wt3-156	156 vgatki	average	average		wt1-153	wt2-154	wt3-156		153 vgatki	154 vgatki	156 vgatki
striatum	6.7055	6.67233	4.038	5.36133	8.05975	6.0313	6.26775	6.02166		1.06984	0.64425	1.28591		1.06455	0.855384	0.962275
NAc	7.97262	4.46812	3.441	5.3185	8.16175	5.0484	6.52513	4.94501		1.22183	0.527346	1.25082		0.684757	0.81508	0.773686
CeA	4.12137	3.3091	3.4668	5.36313	6.08025	3.48325	4.55614	4.05183		0.904576	0.760907	1.33452		0.726294	1.17712	0.764517

## Sheet: DAB wt1-153
		area	mean	Min	Max		Maxthreshold
striatum-1	image 02	640185	244.436	116	255	0	255		8.179		image 02	640185	252.615	238	255	0	255
striatum-2		640185	241.942	66	255	0	255		10.673		image 03	640225	252.603	202	255	0	255
striatum-3	image 03	640225	247.113	101	255	0	255		5.49		image 04	640172	252.601	242	255	0	255
striatum-4		640225	246.451	47	255	0	255		6.152		image 05	640236	252.608	234	255	0	255
striatum-5	image 04	640172	245.631	68	255	0	255		6.97		image 07	640230	252.613	243	255	0	255
striatum-6		640172	246.51	83	255	0	255		6.091		image 10	640224	252.654	233	255	0	255
striatum-7	image 05	640236	247.245	106	255	0	255		5.363		image 11	640170	252.618	25	255	0	255
striatum-8		640236	247.882	164	255	0	255		4.726		image 08	640260	252.606	242	255	0	255
									6.7055
NAc-1	image 02	640185	242.985	59	255	0	255		9.63
NAc-2		640185	244.74	131	255	0	255		7.875
NAc-3	image 03	640225	245.084	96	255	0	255		7.519
NAc-4		640225	243.334	79	255	0	255		9.269
NAc-5	image 04	640172	244.936	85	255	0	255		7.665
NAc-6		640172	245.183	68	255	0	255		7.418
NAc-7	image 05	640236	245.439	90	255	0	255		7.169
NAc-8		640236	245.372	62	255	0	255		7.236
									7.97263
habenula-1	image 07	640230	244.691	38	255	0	255
habenula-2		640230	244.225	62	255	0	255
habenula-3	image 10	640224	243.41	53	255	0	255
habenula-4		640224	242.025	36	255	0	255
habenula-5	image 11	640170	244.804	80	255	0	255
habenula-6		640170	244.548	47	255	0	255
habenula-7
habenula-8
habenula-9
habenula-10
CM-1	image 07	640230	242.319	129	255	0	255
CM-2	image 10	640224	242.874	79	255	0	255
CM-3	image 11	640170	241.647	68	255	0	255
CM-4
CM-5
											600*600
CeA-1	image 07	640230	248.622	70	255	0	255		3.991		image 07	360337	249.079	70	255	0	255		3.534
CeA-2		640230	247.513	78	255	0	255		5.1			360337	247.942	78	255	0	255		4.671
CeA-3	image 10	640224	248.095	53	255	0	255		4.559		image 08	360354	248.004	92	255	0	255		4.602
CeA-4		640224	246.302	72	255	0	255		6.352			360354	249.782	92	255	0	255		2.824
CeA-5	image 11	640170	249.172	60	255	0	255		3.446		image 10	360333	248.274	53	255	0	255		4.38
CeA-6		640170	247.744	57	255	0	255		4.874			360333	246.816	39	255	0	255		5.838
CeA-7									4.72033		image 11	360303	249.903	60	255	0	255		2.715
CeA-8												360303	248.211	57	255	0	255		4.407
CeA-9																			4.12137
CeA-10
LH-1	image 07	640230	244.438	101	255	0	255
LH-2		640230	244.361	44	255	0	255
LH-3	image 10	640224	244.304	122	255	0	255
LH-4		640224	243.845	49	255	0	255
LH-5	image 11	640170	246.316	31	255	0	255
LH-6		640170	244.236	92	255	0	255
LH-7
IPN-1
IPN-2
IPN-3
PB-1
PB-2
PB-3
PB-4
PB-5
PB-6
PAG-1
PAG-2
PAG-3
PAG-4

## Sheet: DAB vgatki-153
		area	mean	Min	Max		Maxthreshold
striatum-1	image 07	640152	244.828	49	255	0	255		7.782		image 07	640152	252.61	237	255	0	255
striatum-2	image 10	640194	245.885	41	255	0	255		6.75		image 10	640194	252.635	188	255	0	255
striatum-3		640194	244.759	67	255	0	255		7.876		image 11	640204	252.605	212	255	0	255
striatum-4	image 11	640204	247.655	57	255	0	255		4.95		image 08	640179	252.587	243	255	0	255
striatum-5		640204	246.694	87	255	0	255		5.911		image 09	640224	252.554	206	255	0	255
striatum-6	image 08	640179	246.107	35	255	0	255		6.48		image 13	640170	252.586	243	255	0	255
striatum-7		640179	246.757	74	255	0	255		5.83		image 14	640189	252.529	200	255	0	255
striatum-8	image 09	640224	245.685	52	255	0	255		6.869		image 15	640258	252.544	231	255	0	255
striatum-9		640224	244.951	50	255	0	255		7.603		image 12	640220	252.576	229	255	0	255
									6.67233		image 16	640231	252.622	243	255	0	255
NAc-1	image 07	640152	247.877	56	255	0	255		4.733
NAc-2		640152	247.497	43	255	0	255		5.113
NAc-3	image 10	640194	248.868	43	255	0	255		3.767
NAc-4		640194	247.942	35	255	0	255		4.693
NAc-5	image 11	640204	248.633	124	255	0	255		3.972
NAc-6		640204	248.032	46	255	0	255		4.573
NAc-7	image 09	640224	248.743	61	255	0	255		3.811
NAc-8		640224	247.471	82	255	0	255		5.083
									4.46812
habenula-1
habenula-2
habenula-3
habenula-4
habenula-5
habenula-6
habenula-7
habenula-8
habenula-9
habenula-10
CM-1
CM-2
CM-3
CM-4
CM-5
CeA-1	image 12	640220	249.896	32	255	0	255		2.68		image 12	360332	249.129	32	255	0	255		3.447
CeA-2		640220	249.634	97	255	0	255		2.942			360332	249.333	145	255	0	255		3.243
CeA-3	image 14	640189	249.077	76	255	0	255		3.452		image 13	360303	249.431	92	255	0	255		3.155
CeA-4		640189	249.326	101	255	0	255		3.203			360303	249.211	116	255	0	255		3.375
CeA-5	image 13	640170	249.868	48	255	0	255		2.718		image 14	360314	248.768	76	255	0	255		3.761
CeA-6		640170	250.276	62	255	0	255		2.31			360314	248.982	154	255	0	255		3.547
CeA-7	image 15	640258	250.105	40	255	0	255		2.439		image 15	360353	249.652	199	255	0	255		2.892
CeA-8		640258	250.154	40	255	0	255		2.39			360353	249.815	107	255	0	255		2.729
CeA-9	image 16	640231	248.989	132	255	0	255		3.633		image 16	360337	249.205	179	255	0	255		3.417
CeA-10		640231	249.674	77	255	0	255		2.948			360337	249.097	77	255	0	255		3.525
									2.8715										3.3091
LH-1
LH-2
LH-3
LH-4
LH-5
LH-6
LH-7
IPN-1
IPN-2
IPN-3
PB-1
PB-2
PB-3
PB-4
PB-5
PB-6
PAG-1
PAG-2
PAG-3
PAG-4

## Sheet: DAB wt2-154
		area	mean	Min	Max		Maxthreshold
striatum-1	image 04	640221	248.662	33	255	0	255		4.006		image 04	640221	252.668	94	255	0	255
striatum-2		640221	249.011	157	255	0	255		3.657		image 05	640179	252.588	190	255	0	255
striatum-3	image 05	640179	249.573	31	255	0	255		3.015		image 06	640214	252.618	239	255	0	255
striatum-4	image 06	640214	247.54	41	255	0	255		5.078		image 01	640199	252.621	219	255	0	255
striatum-5		640214	248.836	87	255	0	255		3.782		image 07	640228	252.615	42	255	0	255
striatum-6	image 01	640199	247.444	109	255	0	255		5.177		image 08	640241	252.605	226	255	0	255
striatum-7		640199	249.07	89	255	0	255		3.551		image 09	640189	252.614	242	255	0	255
striatum-8									4.038		image 11	640255	252.641	242	255	0	255
striatum-9											image 20	640201	252.607	237	255	0	255
NAc-1	image 04	640221	249.139	55	255	0	255		3.529
NAc-2		640221	249.048	64	255	0	255		3.62
NAc-3	image 05	640179	250.054	38	255	0	255		2.534
NAc-4		640179	249.994	102	255	0	255		2.594
NAc-5	image 06	640214	248.852	79	255	0	255		3.766
NAc-6		640214	248.009	41	255	0	255		4.609
NAc-7	image 01	640199	249.186	110	255	0	255		3.435
NAc-8									3.441
CeA-1	image 07	640228	248.432	182	255	0	255		4.183		image 07	360336	250.059	200	255	0	255		2.556
CeA-2		640228	250.179	95	255	0	255		2.436			360336	248.947	214	255	0	255		3.668
CeA-3	image 08	640241	249.869	74	255	0	255		2.736		image 08	360343	249.55	74	255	0	255		3.055
CeA-4		640241	248.347	179	255	0	255		4.258			360343	247.387	179	255	0	255		5.218
CeA-5	image 09	640189	249.518	68	255	0	255		3.096		image 09	360314	249.872	68	255	0	255		2.742
CeA-6		640189	249.938	94	255	0	255		2.676			360314	249.785	94	255	0	255		2.829
CeA-7	image 11	640255	250.293	38	255	0	255		2.348		image 11	360351	250.362	168	255	0	255		2.279
CeA-8		640255	248.77	73	255	0	255		3.871			360351	248.733	187	255	0	255		3.908
CeA-9	image 20	640201	248.761	96	255	0	255		3.846		image 20	360321	248.565	96	255	0	255		4.042
CeA-10		640201	248.774	84	255	0	255		3.833			360321	248.236	84	255	0	255		4.371
									3.3283										3.4668

## Sheet: DAB vgatki-154
		area	mean	Min	Max		Maxthreshold
striatum-1	image 12	640162	246.883	95	255	0	255		5.741		image 12	640162	252.624	134	255	0	255
striatum-2		640162	246.503	65	255	0	255		6.121		image 15	640193	252.602	242	255	0	255
striatum-3	image 15	640193	246.665	63	255	0	255		5.937		image 17	640201	252.628	238	255	0	255
striatum-4		640193	247.833	86	255	0	255		4.769		image 19	640216	252.619	41	255	0	255
striatum-5	image 17	640201	246.873	51	255	0	255		5.755		image 22	640217	252.641	65	255	0	255
striatum-6		640201	248.783	43	255	0	255		3.845		image 21	640192	252.642	241	255	0	255
striatum-7									5.36133		image 18	640219	252.626	230	255	0	255
striatum-8
striatum-9
NAc-1	image 12	640162	248.073	44	255	0	255		4.551
NAc-2		640162	246.521	37	255	0	255		6.103
NAc-3	image 15	640193	247.107	80	255	0	255		5.495
NAc-4		640193	246.467	40	255	0	255		6.135
NAc-5	image 17	640201	249.456	43	255	0	255		3.172
NAc-6		640201	246.173	60	255	0	255		6.455
NAc-7									5.3185
NAc-8
CeA-1	image 19	640216	249.152	60	255	0	255		3.467		image 18	179	360331	247.778	92	255	0	255		4.848
CeA-2		640216	249.496	74	255	0	255		3.123			180	360331	246.865	46	255	0	255		5.761
CeA-3	image 22	640217	248.704	49	255	0	255		3.937		image 19	181	360329	247.88	60	255	0	255		4.739
CeA-4		640217	248.117	76	255	0	255		4.524			182	360329	248.42	155	255	0	255		4.199
CeA-5	image 21	640192	248.325	64	255	0	255		4.317		image 21	183	360316	246.296	64	255	0	255		6.346
CeA-6		640192	248.175	38	255	0	255		4.467			184	360316	246.527	40	255	0	255		6.115
CeA-7									3.9725		image 22	185	360330	247.592	128	255	0	255		5.049
CeA-8												186	360330	246.793	82	255	0	255		5.848
CeA-9																				5.36313
CeA-10

## Sheet: DAB wt3-156
		area	mean	Min	Max		Maxthreshold
striatum-1	image 01	640208	245.104	77	255	0	255		7.551		image 01	640208	252.655	239	255	0	255
striatum-2		640208	244.1	44	255	0	255		8.555		image 02	640186	252.679	232	255	0	255
striatum-3	image 02	640186	243.62	105	255	0	255		9.059		image 04	640238	252.678	243	255	0	255
striatum-4		640186	246.566	98	255	0	255		6.113		image 07	640253	252.662	212	255	0	255
striatum-5	image 04	640238	241.656	127	255	0	255		11.022		image 10	640250	252.674	123	255	0	255
striatum-6		640238	243.687	40	255	0	255		8.991		image 11	640217	252.663	243	255	0	255
striatum-7	image 07	640253	244.565	121	255	0	255		8.097		image 12	640225	252.739	41	255	0	255
striatum-8		640253	247.572	84	255	0	255		5.09		image 13	640219	252.702	231	255	0	255
striatum-9									8.05975		image 15	640204	252.677	75	255	0	255
											image 14	640204	252.688	210	255	0	255
NAc-1	image 01	640208	244.279	83	255	0	255		8.376
NAc-2		640208	243.952	148	255	0	255		8.703
NAc-3	image 02	640186	243.563	57	255	0	255		9.116
NAc-4		640186	244.56	150	255	0	255		8.119
NAc-5	image 04	640238	243.623	50	255	0	255		9.055
NAc-6		640238	244.054	61	255	0	255		8.624
NAc-7	image 07	640253	245.245	75	255	0	255		7.417
NAc-8		640253	246.778	57	255	0	255		5.884
									8.16175		image 10	360348	244.198	127	255	0	255		8.476
CeA-1	image 10	640250	246.95	107	255	0	255		5.724			360348	244.976	107	255	0	255		7.698
CeA-2		640250	245.034	105	255	0	255		7.64		image 11	360330	244.845	139	255	0	255		7.818
CeA-3	image 11	640217	245.308	63	255	0	255		7.355			360330	245.851	113	255	0	255		6.812
CeA-4		640217	246.277	113	255	0	255		6.386		image 12	360334	245.449	101	255	0	255		7.29
CeA-5	image 12	640225	246.021	52	255	0	255		6.718			360334	248.805	164	255	0	255		3.934
CeA-6		640225	248.191	117	255	0	255		4.548		image 13	360331	247.651	106	255	0	255		5.051
CeA-7	image 13	640219	247.963	106	255	0	255		4.739			360331	248.527	172	255	0	255		4.175
CeA-8		640219	247.235	164	255	0	255		5.467		image 14	360323	245.027	91	255	0	255		7.661
CeA-9	image 15	640204	246.135	73	255	0	255		6.542			360323	250.091	182	255	0	255		2.597
CeA-10		640204	248.031	139	255	0	255		4.646		image 15	360323	246.348	73	255	0	255		6.329
									5.9765			360323	247.555	139	255	0	255		5.122
																			6.08025

## Sheet: DAB vgatki-156
		area	mean	Min	Max		Maxthreshold										0	255
striatum-1	image 10	640195	248.53	83	255	0	255		4.067
striatum-2		640195	246.178	73	255	0	255		6.419			image 10	640195	252.597	191	255
striatum-3	image 11	640221	246.454	53	255	0	255		6.161			image 11	640221	252.615	236	255	0	255
striatum-4		640221	247.776	53	255	0	255		4.839			image 12	640214	252.615	214	255	0	255
striatum-5	image 12	640214	248.399	101	255	0	255		4.216			image 14	640185	252.679	237	255	0	255
striatum-6		640214	247.963	109	255	0	255		4.652			image 09	640226	252.585	238	255	0	255
striatum-7	image 14	640185	247.436	38	255	0	255		5.243			image 16	640167	252.627	243	255	0	255
striatum-8		640185	247.478	72	255	0	255		5.201			image 17	640185	252.63	243	255	0	255
striatum-9	image 09	640226	243.786	74	255	0	255		8.799			image 19	640187	252.675	196	255	0	255
striatum-10		640226	241.869	73	255	0	255		10.716			image 20	640206	252.635	233	255	0	255
									6.0313
NAc-1	image 10	640195	248.481	85	255	0	255		4.116
NAc-2		640195	246.564	66	255	0	255		6.033
NAc-3	image 11	640221	246.953	43	255	0	255		5.662
NAc-4		640221	247.926	85	255	0	255		4.689
NAc-5	image 12	640214	248.266	49	255	0	255		4.349
NAc-6		640214	248.902	73	255	0	255		3.713
NAc-7	image 14	640185	247.282	53	255	0	255		5.397
NAc-8		640185	246.417	85	255	0	255		6.262
NAc-9	image 09	640226	245.979	50	255	0	255		6.606
NAc-10		640226	248.928	129	255	0	255		3.657
									5.0484
CeA-1	image 16	640167	249.92	72	255	0	255		2.707			image 16	360302	249.252	72	255	0	255		3.375
CeA-2		640167	249.775	196	255	0	255		2.852				360302	249.033	204	255	0	255		3.594
CeA-3	image 17	640185	250.096	95	255	0	255		2.534			image 17	360312	249.648	95	255	0	255		2.982
CeA-4		640185	249.735	187	255	0	255		2.895				360312	249.483	187	255	0	255		3.147
CeA-5	image 19	640187	249.809	31	255	0	255		2.866			image 19	360313	249.441	31	255	0	255		3.234
CeA-6		640187	249.269	104	255	0	255		3.406				360313	249.03	104	255	0	255		3.645
CeA-7	image 20	640206	249.854	117	255	0	255		2.781			image 20	360323	249.289	187	255	0	255		3.346
CeA-8		640206	248.902	79	255	0	255		3.733				360323	248.092	79	255	0	255		4.543
CeA-9									2.97175											3.48325
CeA-10

## Sheet: 4d-vgatki s.c. tail immersion
vgat-cre-/MOR-KI				s.c. 10mg/kg morphine			50度
vgat-cre+/MOR-KI						Time after morphine (min)
experiment date	Mouse NO.	DOB	baseline			5	15	30	45	60	90	120	150	180	240
20171106	65	8/7/17	2.87	3.91	3.39	3.42	2.51	3.08	3.53	3.17	3.07	4.21	3.65	3.53	4.15
	63		2.75	4.19	3.47	3.15	4.19	3.72	3.31	3.37	3.08	3.75	3.4	3.9	3.32
	64		2.63	4.38	3.505	4.16	5.37	20	20	20	20	20	4.04	3	2.97
	62		2.44	3.78	3.11	3.44	3.69	2.68	3.72	3.82	3.5	3.88	3.75	3.56	3.18
	58	8/2/17	3.4	3.7	3.55	3.86	3.6	3.75	4.04	4.09	3.97	3.24	4.13	4.06	3.76
	59		3.88	4.03	3.955	3.09	3.68	3.25	4	3.84	3.51	3.5	3.31	3.37	3.53
	56		2.57	2.66	2.615	2.44	2.7	2.72	2.47	2.63	2.72	2.63	2.27	2.33	2.15
	55		3.18	3.42	3.3	3.04	3.51	3.37	3.08	3.25	4.05	3.09	3.53	2.84	3.22
	54		2.84	2.98	2.91	2.78	3.33	3.24	3.66	3.03	3.55	3.16	3.91	3.03	2.47
	51		3.51	3.53	3.52	6.16	16	20	20	20	20	20	6.59	5.72	3.55
20171113	71	8/13/17	3.85	4.18	4.015	4.66	4.78	20	20	20	20	6.03	4.78	4.84	4.32
	68		4.06	4.74	4.4	5.85	11.33	20	20	20	20	4.93	4.16	4.01	3.78
	69		3.91	3.5	3.705	3.47	5.068	16.13	20	20	20	2.88	2.65	2.26	2.65
	67		4.56	4.18	4.37	5.34	6.43	20	20	20	20	3.07	3.88	3.66	4.58
	70		4.1	3.22	3.66	3.43	4.54	20	20	20	20	9.28	3.06	4.04	2.93
%MPE
	65					0.180614	-5.29801	-1.86635	0.842866	-1.3245	-1.92655	4.93679	1.56532	0.842866	4.57556
	63					-1.93587	4.35572	1.5124	-0.967937	-0.604961	-2.35935	1.69389	-0.423472	2.60133	-0.907441
	64					3.9709	11.3065	100	100	100	100	100	3.24341	-3.06153	-3.24341
	62					1.95382	3.43398	-2.54589	3.6116	4.20367	2.30906	4.55891	3.78922	2.6643	0.414446
	58					1.8845	0.303951	1.21581	2.97872	3.28267	2.55319	-1.8845	3.52584	3.1003	1.2766
	59					-5.39109	-1.71393	-4.39389	0.280461	-0.716734	-2.77345	-2.83577	-4.01994	-3.646	-2.6488
	56					-1.00661	0.488927	0.603969	-0.834052	0.0862813	0.603969	0.0862813	-1.98447	-1.63934	-2.67472
	55					-1.55689	1.25749	0.419162	-1.31737	-0.299401	4.49102	-1.25749	1.37725	-2.75449	-0.479042
	54					-0.760679	2.45758	1.93095	4.38853	0.702165	3.74488	1.46284	5.85138	0.702165	-2.57461
	51					16.0194	75.7282	100	100	100	100	100	18.6286	13.3495	0.182039
	71					4.03503	4.78574	100	100	100	100	12.6056	4.78574	5.16109	1.90804
	68					9.29487	44.4231	100	100	100	100	3.39744	-1.53846	-2.5	-3.97436
	69					-1.44216	8.36453	76.2504	100	100	100	-5.0629	-6.47438	-8.86775	-6.47438
	67					6.20601	13.1798	100	100	100	100	-8.31734	-3.135	-4.54255	1.34357
	70					-1.40759	5.38556	100	100	100	100	34.3941	-3.67197	2.32558	-4.46756

## Sheet: 4e-vgatki s.c. hot plate
vgat-cre-/MOR-KI				s.c. 10mg/kg morphine			52度 hot plate
vgat-cre+/MOR-KI						Time after morphine (min)
experiment date	Mouse NO.		baseline		average	15	30	60	90	120	180	240
20171205	68	8/13/17	14.7	12.3	13.5	15.5	15.2	10.7	10.6	10.5	15.3	11.3
	67		17	13.8	15.4	23.4	23.3	24.6	10.2	13.4	17.5	17.1
	70		19.1	11.7	15.4	11.3	22	16.6	12.4	12.5	10.6	18
	71		17.2	19.8	18.5	17.1	26.4	21.2	27.2	21	12.9	12.4
	69		15.3		15.3	12.5	11.4	12.9	15.7	10.8	20.7	16.8
	65	8/7/17	21.3		21.3	11.5	20.1	20.4	13.1	16.4	28.6	19.5
	64		22.4	15.4	18.9	24.8	16.8	20.8	17	19.7	20.9	22
	62		20.9	22.1	21.5	20.4	26.2	24.7	19.5	15.6	12.9	20.4
20171206	56	8/2/17	25.9	12.9	19.4	16.8	29.4	23.7	15.5	23.7	15.4	19.2
	58		10.6	28.2	19.4	21.7	20.1	19.5	29.1	19.1	22.4	19.5
	51		22.6	23.6	23.1	21.5	31.1	32.6	26.1	18.7	15.1	18.2
	53		23.2	12.2	17.7	26.1	12.7	18.9	13.3	24	14.4	15.3
	55		18.3	20.1	19.2	12.6	18.3	10	17.2	15.8	12.9	16.3
%MPE
	65					6.34921	5.39683	-8.88889	-9.20635	-9.52381	5.71429	-6.98413
	63					27.027	26.6892	31.0811	-17.5676	-6.75676	7.09459	5.74324
	64					-13.8514	22.2973	4.05405	-10.1351	-9.7973	-16.2162	8.78378
	62					-5.28302	29.8113	10.1887	32.8302	9.43396	-21.1321	-23.0189
	58					-9.42761	-13.1313	-8.08081	1.3468	-15.1515	18.1818	5.05051
	59					-41.3502	-5.06329	-3.79747	-34.5992	-20.6751	30.8017	-7.59494
	56					22.6054	-8.04598	7.27969	-7.27969	3.06513	7.66284	11.8774
	55					-4.68085	20	13.617	-8.51064	-25.1064	-36.5957	-4.68085
	51					-10.1562	39.0625	16.7969	-15.2344	16.7969	-15.625	-0.78125
	71					8.98438	2.73438	0.390625	37.8906	-1.17187	11.7188	0.390625
	68					-7.30594	36.5297	43.379	13.6986	-20.0913	-36.5297	-22.3744
	69					30.7692	-18.315	4.3956	-16.1172	23.0769	-12.0879	-8.79121
	67					-25.5814	-3.48837	-35.6589	-7.75194	-13.1783	-24.4186	-11.2403
	70

## Sheet: 4f-vgat-cre MOR-KI s.c. vonfrey
	mouse no.	0.07		0.16		0.4		0.6		1		1.4
1/13/18	6	0	0	1	1	2	2	4	4	5	5	5	5
	8	0	3	2	4	4	5	5	5	5	5	5	5
	7	0	0	1	2	3	3	4	5	5	5	5	5
	4	0	0	0	1	1	3	3	4	4	5	5	5
	5	0	0	0	1	3	2	4	4	5	5	5	5
	3	0	4	2	4	3	5	5	5	5	5	5	5
	2	0	0	1	2	3	2	5	4	5	4	5	5
	94	0	1	1	3	2	3	4	4	4	5	5	5
	92	0	0	1	1	2	2	4	4	5	5	5	5
	93	0	0	2	1	3	3	4	3	5	4	5	5
	95	0	1	1	3	4	5	4	5	5	5	5	5
	91	0	0	1	3	2	4	3	4	5	5	5	5
	3	0	2	2	3	3	3	4	5	5	5	5	5
	5	0	1	1	3	2	3	3	4	5	5	5	5
	1	0	2	0	3	2	4	4	5	5	5	5	5

[truncated: 10 more sheets: 4gh-formalin Vgat-Cre MOR-KI, 4i-vgatki Hargreaves morphine, 4j-vgatki von-Frey morphine, 4k-vgatki Hargreaves, 4l-vgatki von-Frey up and down, 4o-vgatflx Hargreaves, 4p-vgatflx von-Frey up and down, 4-s1c, 4-s1d, 4-s1f]
