# Supplementary material for: Different neuronal populations mediate inflammatory pain analgesia by exogenous and endogenous opioids
Source: eLife. 2020 Jun 10;9:e55289. doi: 10.7554/eLife.55289 (PMC7311172; doi:10.7554/eLife.55289)
Supplement: Figure 5—source data 1. [file elife-55289-fig5-data1.xlsx]

## Sheet: 5c-tail immersion 50
	Lbx1-Cre-/MOR-KI-/-												Lbx1-Cre+/MOR-KI-/-
Baseline	5.75	5.09	4.23	3.965	3.85	6.08	4.005	4.885	5.57	4.265	4.89	5.485	4.285	3.7	3.785	3.825	4.42	5.195	4.53	3.315	4.935	5.97	4.325
Morphine	4.045	4.595	4.92	3.89	4.17	5.6	3.465	5.775	5.09	4.145	3.625	4.365	19.845	13.565	14.905	10.265	7.095	10.22	8.715	6.655	11.83	7.64	9.935

## Sheet: 5d-hot plate 52
	Lbx1-Cre-/MOR-KI-/-												Lbx1-Cre+/MOR-KI-/-
Baseline	25.89	29.895	22.72	29.95	24.225	25.11	20.64	26.145	26.3	21.84	21.565	19.845	23.815	18.575	26.27	23.545	15.845	27.305	27.94	24.58	22.095	23.44	22.64
Morphine	21.8	19.735	21.48	17.065	16.895	19.875	23.31	11.655	26.5	20.175	21.045	25.555	29.36	13.345	20.515	41.41	18.25	27.53	31.925	40.985	28.135	26.17	24.465

## Sheet: 5e 5s1e-von frey 
	Lbx1-Cre-/MOR-KI-/- Baseline												Lbx1-Cre-/MOR-KI-/- + Morphine												Lbx1-Cre+/MOR-KI-/-Baseline												Lbx1-Cre+/MOR-KI-/- Morphine
0.07	0	0	0	0	0	0	0	0	0	0	0	20	0	20	0	0	0	20	0	0	0	0	0	20	0	0	0	0	20	0	0	0	0	0	20		0	20	20	0	0	0	0	0	0	0	0
0.16	0	0	0	0	20	20	0	0	20	0	20	40	0	20	20	20	0	20	40	0	20	20	40	40	20	0	20	20	40	40	0	20	0	0	20		0	0	0	20	0	0	0	20	0	0	0
0.4	20	20	20	40	40	40	20	40	20	40	60	60	0	0	40	40	40	40	40	20	40	60	40	40	20	0	40	20	20	20	40	40	40	40	40		20	0	20	0	20	0	20	40	40	40	40
0.6	60	60	60	40	60	60	60	60	60	40	60	80	60	60	40	60	60	80	40	60	60	60	80	80	60	40	40	60	60	60	40	60	60	60	40		40	20	60	60	60	20	40	40	40	20	20
1	80	80	80	80	80	60	80	60	80	80	80	80	80	80	60	80	100	80	60	80	60	100	100	60	80	60	80	80	80	80	100	100	80	80	60		40	40	60	40	60	20	20	40	40	60	40
1.4	100	100	100	100	100	100	100	100	80	100	80	100	100	100	100	100	100	100	80	100	100	100	100	80	80	100	100	80	100	100	100	100	100	80	80		60	60	60	80	60	60	40	80	80	60	60

## Sheet: 5gh-formalin
20190814	saline/morphine s.c. 10 mg/kg -Formalin 5%, 10 ul																		20181029	morphine s.c.-Formalin							20190109	morphine s.c.-Formalin
	Cre-	Cre-	Cre-	Cre+	Cre+	Cre+	Cre-	Cre+	Cre-	Cre-	Cre+	Cre+	Cre+	Cre+	Cre+	Cre-	Cre+			1	2	3	4	5				1	2	3	4	5	6
	81	82	80	74	75	76	77	78	79	83	84	85	86	87	88	90	91		start								start	1 day, 9:20:00	1 day, 10:03:00	1 day, 10:58:00	1 day, 11:39:00	1 day, 12:18:00	1 day, 12:56:00
	SF	MF	SF	MF	SF	SF	SF	MF	SF	MF	MF	SF	SF	SF	SF	SF	SF		0-5 min	22.43	90.34	86.57	60.38	28.59			0-5 min	69.36	128.79	97.6	158.98	65.69	184.8
	1	2	3	4	5	6	7	8	9	10	11	12	13	14	15	16	17		5-10 min	0	11.97	4.84	7.13	0			5-10 min	46.64	66.13	53.99	5.38	12.11	1.65
start	0:35:22	0:36:30	0:37:07	0:37:40	0:38:40	0:39:28	0:35:45	0:36:19	0:37:27	0:38:16	0:39:18	0:39:44	0:32:00	0:32:40	0:33:26	0:34:29	0:35:10		10-15 min	9.48	70.94	7.2	1.39	2.84			10-15 min	67.29	1.81	3.56	61.47	0	56.57
0-5 min	118.17	97.04	79.62	37.54	142.95	89.12	114.5	25.44	151.83	103.46	98.25	134.08	132.05	82.57	126.69	159.01	148.44		15-20 min	0	172.83	42.06	2.71	25.06			15-20 min	0.5	38.96	10.68	55.12	0	0.84
5-10 min	18.12	24.31	0	2.35	13.09	56.43	0	10.83	14.72	0.43	12.61	5.03	15.82	0.69	26.25	0	39.04		20-25 min	55.05	141.68	121.53	0.35	35.9			20-25 min	59.93	77.24	10.72	54.04	0	0.88
10-15 min	3.15	13.38	72.79	1.07	9.22	101.36	140.29	0.79	65.13	68.69	8.23	116.45	85.82	58.69	24.6	55.47	1.06		25-30 min	61.04	28.77	13.46	1.92	9.43			25-30 min	93.37	23.61	3.09	0	1.56	5.73
15-20 min	43.31	7.91	36.5	1	39.15	4.65	111.38	42.19	117.37	86.81	0.62	125.15	88.22	174.15	159.25	96.9	130.53		30-35 min	57.12	0	90.72	24.18	44.62			30-35 min	99.68	79.35	19.19	123.68	0.78	43.21
20-25 min	106.41	91.75	70.76	0	104.14	13.88	123.41	98.96	85.77	135.4	3.22	107.41	98.44	54.2	21.56	25.54	88.69		35-40 min	54.63	0	22.69	49.09	76.77			35-40 min	22.81	0	53.89	0.9	2.59	156.12
25-30 min	1.49	45.16	0.5	1.03	35.56	1.94	0	93.23	1.22	155.46	54.52	27.89	142.22	1.13	0.76	0	0		40-45 min	86.73	33.61	73.71	100.68	31.81			40-45 min	53.53	0	64.92	0.38	0	53.31
30-35 min	7.4	0	140.72	0	0.35	0	0	30.05	0	68.88	163.04	0	38	97.2	0	0	0		45-50 min	124.05	0	0	66.53	0			45-50 min	0	0	88.22	0	2.37	1.72
35-40 min	0	0	0	22.98	0	0	0	47.52	0	3.74	19.94	0	5.83	36.75	0	0	0		50-55 min	4.82	3.65	0.37	30.76	0			50-55 min	0	0	74.23	12.38	70.52	0
40-45 min	0	14.7	0	86.42	0.59	0	24.47	27.22	13.64	24.14	18.13	0	4.75	0	0.69	0	0		55-60 min	0	0	0.37	187.18	0			55-60 min	22.22	0	15.49	28.13	0.84	0
45-50 min	0	0	0	1.25	0	0	67.15	100.56	124.24	4.34	20.14	0	1.87	0	0	0	0
50-55 min	0	30.43	0	0	0	0	73.14	9.93	9.78	0	21.52	0	0	0	0	0	0
55-60 min	0	0	0	75.66	0	0	1.59	60.34	14.9	0	68.97	0	0	0	0	0.31	35.19			1	2	3	4	5				1	2	3	4	5	6
																			I (0-10 min)	22.43	102.31	91.41	67.51	28.59			I (0-10 min)	116	194.92	151.59	164.36	77.8	186.45
																			II (10-60 min)	452.92	451.48	372.11	464.79	226.43			II (10-60 min)	419.33	220.97	343.99	336.1	78.66	318.38
	Cre-	Cre-	Cre-	Cre+	Cre+	Cre+	Cre-	Cre+	Cre-	Cre-	Cre+	Cre+	Cre+	Cre+	Cre+	Cre-	Cre+
	81	82	80	74	75	76	77	78	79	83	84	85	86	87	88	90	91
	SF	MF	SF	MF	SF	SF	SF	MF	SF	MF	MF	SF	SF	SF	SF	SF	SF			1	4	5	Lbx1-Cre+/MOR-KI
	1	2	3	4	5	6	7	8	9	10	11	12	13	14	15	16	17
I (0-10 min)	136.29	121.35	79.62	39.89	156.04	145.55	114.5	36.27	166.55	103.89	110.86	139.11	147.87	83.26	152.94	159.01	187.48
II (10-60 min)	161.76	203.33	321.27	189.41	189.01	121.83	541.43	510.79	432.05	547.46	378.33	376.9	465.15	422.12	206.86	178.22	255.47			2	3		Lbx1-Cre-/MOR-KI
	Cre-	Cre-	Cre-	Cre-	Cre-		Cre-	Cre-		Cre+	Cre+	Cre+	Cre+	Cre+	Cre+	Cre+		Cre+	Cre+	Cre+
	81	80	77	79	90		82	83		75	76	85	86	87	88	91		74	78	84
	SF	SF	SF	SF	SF		MF	MF		SF	SF	SF	SF	SF	SF	SF		MF	MF	MF
	1	3	7	9	16		2	10		5	6	12	13	14	15	17		4	8	11
start	0:35:22	0:37:07	0:35:45	0:37:27	0:34:29		0:36:30	0:38:16		0:38:40	0:39:28	0:39:44	0:32:00	0:32:40	0:33:26	0:35:10		0:37:40	0:36:19	0:39:18
0-5 min	118.17	79.62	114.5	151.83	159.01		97.04	103.46		142.95	89.12	134.08	132.05	82.57	126.69	148.44		37.54	25.44	98.25
5-10 min	18.12	0	0	14.72	0		24.31	0.43		13.09	56.43	5.03	15.82	0.69	26.25	39.04		2.35	10.83	12.61
10-15 min	3.15	72.79	140.29	65.13	55.47		13.38	68.69		9.22	101.36	116.45	85.82	58.69	24.6	1.06		1.07	0.79	8.23
15-20 min	43.31	36.5	111.38	117.37	96.9		7.91	86.81		39.15	4.65	125.15	88.22	174.15	159.25	130.53		1	42.19	0.62
20-25 min	106.41	70.76	123.41	85.77	25.54		91.75	135.4		104.14	13.88	107.41	98.44	54.2	21.56	88.69		0	98.96	3.22
25-30 min	1.49	0.5	0	1.22	0		45.16	155.46		35.56	1.94	27.89	142.22	1.13	0.76	0		1.03	93.23	54.52
30-35 min	7.4	140.72	0	0	0		0	68.88		0.35	0	0	38	97.2	0	0		0	30.05	163.04
35-40 min	0	0	0	0	0		0	3.74		0	0	0	5.83	36.75	0	0		22.98	47.52	19.94
40-45 min	0	0	24.47	13.64	0		14.7	24.14		0.59	0	0	4.75	0	0.69	0		86.42	27.22	18.13
45-50 min	0	0	67.15	124.24	0		0	4.34		0	0	0	1.87	0	0	0		1.25	100.56	20.14
50-55 min	0	0	73.14	9.78	0		30.43	0		0	0	0	0	0	0	0		0	9.93	21.52
55-60 min	0	0	1.59	14.9	0.31		0	0		0	0	0	0	0	0	35.19		75.66	60.34	68.97
	Cre-	Cre-	Cre-	Cre-	Cre-		Cre-	Cre-		Cre+	Cre+	Cre+	Cre+	Cre+	Cre+	Cre+		Cre+	Cre+	Cre+
	81	80	77	79	90		82	83		75	76	85	86	87	88	91		74	78	84
	SF	SF	SF	SF	SF		MF	MF		SF	SF	SF	SF	SF	SF	SF		MF	MF	MF
	1	3	7	9	16		2	10		5	6	12	13	14	15	17		4	8	11
I (0-10 min)	136.29	79.62	114.5	166.55	159.01		121.35	103.89		156.04	145.55	139.11	147.87	83.26	152.94	187.48		39.89	36.27	110.86
II (10-60 min)	161.76	321.27	541.43	432.05	178.22		203.33	547.46		189.01	121.83	376.9	465.15	422.12	206.86	255.47		189.41	510.79	378.33

## Sheet: 5i-l Hargreaves
		20190424	Lbx1-Cre MOR-KI									20190424	Lbx1-Cre MOR-KI					20190425	Lbx1-Cre MOR-KI									20190427	Lbx1-Cre MOR-KI									20190429	Lbx1-Cre MOR-KI									20190501	Lbx1-Cre MOR-KI
		Baseline	Hargreaves	Intensity=8		cutoff time=20 sec			mean	mean		CFA 2h	Hargreaves		mean	mean		CFA d1	Hargreaves	Intensity=8		cutoff time=20 sec			mean	mean		CFA d3	Hargreaves	Intensity=8		cutoff time=20 sec			mean	mean		CFA d5	Hargreaves	Intensity=8		cutoff time=20 sec			mean	mean		CFA d7	Hargreaves
original No.	genotype	No.	left hindpaw			right hindpaw			lhp	rhp		lhp	left hindpaw	right hindpaw	lhp	rhp		lhp	left hindpaw			right hindpaw			lhp	rhp		No.	left hindpaw			right hindpaw			lhp	rhp		No.	left hindpaw			right hindpaw			lhp	rhp		No.	left hindpaw
34#	Cre+	1	10.4	8.3		11.7	7.2		9.35	9.45		1	15.1	1.4	15.1	1.4		1	7.1	7.1		2.6	0.9		7.1	1.75		1	10.8	7.4		1.6	1.2		9.1	1.4		1	8.9	10.1		1.3	0.9		9.5	1.1		1	6.1
36#	Cre-	2	14.9	6.1		8.5	15.2		10.5	11.85		2	7.8	1.3	7.8	1.3		2	6.8	10.7		2.6	0.5		8.75	1.55		2	7.1	14.2		2.6	5.3		10.65	3.95		2	11.9	9.8		8.6	12.2		10.85	10.4		2	15.2
11#	Cre+	3	8.9	10.1		8.8	16.8		9.5	12.8		3	6.8	0.7	6.8	0.7		3	6.2	11.1		2.1	1.6		8.65	1.85		3	6.4	7.3		1.4	2.9		6.85	2.15		3	9.9	6.9		4.1	7.6		8.4	5.85		3	12.8
33#	Cre+	4	8.9	11.1		12.1	7.2		10	9.65		4	13.1	0.6	13.1	0.6		4	8.1	13.2		0.9	3.3		10.65	2.1		4	10.6	11.6		7.4	1.2		11.1	4.3		4	6.6	10.2		5.7	2.1		8.4	3.9		4	7.9
2#	Cre-	5	8.5	6.9		9.2	12.3		7.7	10.75		5	16.8	0.9	16.8	0.9		5	8.4	7		2.3	3.6		7.7	2.95		5	12.2	8.2		8.9	6.7		10.2	7.8		5	7.8	11.7		2.6	0.9		9.75	1.75		5	6.4
4#	Cre-	6	7.1	9.6		7.8	11.9		8.35	9.85		6	13.7	1.9	13.7	1.9		6	7.8	12.9		2.6	2.2		10.35	2.4		6	6.9	10.5		1.1	6.6		8.7	3.85		6	13.4	7.7		6.5	8.2		10.55	7.35		6	11.2
7#	Cre-	7	15.7	14.3		13.6	6.7		15	10.15		7	9.4	2.7	9.4	2.7		7	9.9	13.2		6.9	8.1		11.55	7.5		7	9.9	14.7		2.6	5.4		12.3	4		7	14.5	15.3		2.1	2.2		14.9	2.15		7	8.6
61#	Cre+	8	7.2	8.7		6.6	10.9		7.95	8.75		8	16.9	1.6	16.9	1.6		8	10.4	9.5		1.5	2.1		9.95	1.8		8	6.4	9.1		2.7	2.6		7.75	2.65		8	8.4	6.8		6.4	0.9		7.6	3.65		8	6.7
62#	Cre+	9	16.2	9.3		14.8	7.2		12.75	11		9	7.6	0.9	7.6	0.9		9	7.5	6.6		0.6	2.5		7.05	1.55		9	13.1	7.5		1.7	1.1		10.3	1.4		9	7.4	7.7		1.5	3.7		7.55	2.6		9	5.8
63#	Cre+/KI+/-	10	12.4	7.8		7.6	7.1		10.1	7.35		10	8.4	1.9	8.4	1.9		10	7.6	8.3		1.5	1.2		7.95	1.35		10	9.2	6.8		1.4	1.4		8	1.4		10	9.9	6.3		2.7	0.6		8.1	1.65		10	10.2
53#	Cre-	11	7.4	7.8		10.5	6.8		7.6	8.65		11	7.2	0.9	7.2	0.9		11	10.9	8.2		2.9	4.1		9.55	3.5		11	6.3	9.6		4.1	5.4		7.95	4.75		11	6.5	5.8		8.8	3.1		6.15	5.95		11	8.3
65#	Cre-	12	10.1	9.9		7.8	6.8		10	7.3		12	7.4	3.5	7.4	3.5		12	12.2	9.3		1.2	0.8		10.75	1		12	6.8	10.3		3.6	3.6		8.55	3.6		12	12.1	14.2		3.7	1.3		13.15	2.5		12	18.2
58#	Cre-	13	8.3	13.9		10.1	12.9		11.1	11.5		13	14.1	1.3	14.1	1.3		13	8.1	10.3		0.9	1.5		9.2	1.2		13	15.1	8.9		1.8	1.9		12	1.85		13	8.9	6.3		4.1	2.2		7.6	3.15		13	6.7
60#	Cre-	14	10.2	8.1		6.9	8.8		9.15	7.85		14	8.6	0.5	8.6	0.5		14	6.2	10.9		0.6	1.9		8.55	1.25		14	7.5	6.2		2.9	5.4		6.85	4.15		14	6.2	7.2		2.9	4.6		6.7	3.75		14	8.5
		Baseline										CFA 2h						CFA d1										CFA d3										CFA d5										CFA d7
		No.	left hindpaw			right hindpaw			lhp	rhp		lhp	left hindpaw	right hindpaw	lhp	rhp		lhp	left hindpaw			right hindpaw			lhp	rhp		No.	left hindpaw			right hindpaw			lhp	rhp		No.	left hindpaw			right hindpaw			lhp	rhp		No.	left hindpaw
	Cre-	2	14.9	6.1		8.5	15.2		10.5	11.85		2	7.8	1.3	7.8	1.3		2	6.8	10.7		2.6	0.5		8.75	1.55		2	7.1	14.2		2.6	5.3		10.65	3.95		2	11.9	9.8		8.6	12.2		10.85	10.4		2	15.2
	Cre-	5	8.5	6.9		9.2	12.3		7.7	10.75		5	16.8	0.9	16.8	0.9		5	8.4	7		2.3	3.6		7.7	2.95		5	12.2	8.2		8.9	6.7		10.2	7.8		5	7.8	11.7		2.6	0.9		9.75	1.75		5	6.4
	Cre-	6	7.1	9.6		7.8	11.9		8.35	9.85		6	13.7	1.9	13.7	1.9		6	7.8	12.9		2.6	2.2		10.35	2.4		6	6.9	10.5		1.1	6.6		8.7	3.85		6	13.4	7.7		6.5	8.2		10.55	7.35		6	11.2
	Cre-	7	15.7	14.3		13.6	6.7		15	10.15		7	9.4	2.7	9.4	2.7		7	9.9	13.2		6.9	8.1		11.55	7.5		7	9.9	14.7		2.6	5.4		12.3	4		7	14.5	15.3		2.1	2.2		14.9	2.15		7	8.6
	Cre-	11	7.4	7.8		10.5	6.8		7.6	8.65		11	7.2	0.9	7.2	0.9		11	10.9	8.2		2.9	4.1		9.55	3.5		11	6.3	9.6		4.1	5.4		7.95	4.75		11	6.5	5.8		8.8	3.1		6.15	5.95		11	8.3
	Cre-	12	10.1	9.9		7.8	6.8		10	7.3		12	7.4	3.5	7.4	3.5		12	12.2	9.3		1.2	0.8		10.75	1		12	6.8	10.3		3.6	3.6		8.55	3.6		12	12.1	14.2		3.7	1.3		13.15	2.5		12	18.2
	Cre-	13	8.3	13.9		10.1	12.9		11.1	11.5		13	14.1	1.3	14.1	1.3		13	8.1	10.3		0.9	1.5		9.2	1.2		13	15.1	8.9		1.8	1.9		12	1.85		13	8.9	6.3		4.1	2.2		7.6	3.15		13	6.7
	Cre-	14	10.2	8.1		6.9	8.8		9.15	7.85		14	8.6	0.5	8.6	0.5		14	6.2	10.9		0.6	1.9		8.55	1.25		14	7.5	6.2		2.9	5.4		6.85	4.15		14	6.2	7.2		2.9	4.6		6.7	3.75		14	8.5
								Cre-	9.925	9.7375				Cre-	10.625	1.625								Cre-	9.55	2.66875								Cre-	9.65	4.24375								Cre-	9.95625	4.625
	Cre+	1	10.4	8.3		11.7	7.2		9.35	9.45		1	15.1	1.4	15.1	1.4		1	7.1	7.1		2.6	0.9		7.1	1.75		1	10.8	7.4		1.6	1.2		9.1	1.4		1	8.9	10.1		1.3	0.9		9.5	1.1		1	6.1
	Cre+	3	8.9	10.1		8.8	16.8		9.5	12.8		3	6.8	0.7	6.8	0.7		3	6.2	11.1		2.1	1.6		8.65	1.85		3	6.4	7.3		1.4	2.9		6.85	2.15		3	9.9	6.9		4.1	7.6		8.4	5.85		3	12.8
	Cre+	4	8.9	11.1		12.1	7.2		10	9.65		4	13.1	0.6	13.1	0.6		4	8.1	13.2		0.9	3.3		10.65	2.1		4	10.6	11.6		7.4	1.2		11.1	4.3		4	6.6	10.2		5.7	2.1		8.4	3.9		4	7.9
	Cre+	8	7.2	8.7		6.6	10.9		7.95	8.75		8	16.9	1.6	16.9	1.6		8	10.4	9.5		1.5	2.1		9.95	1.8		8	6.4	9.1		2.7	2.6		7.75	2.65		8	8.4	6.8		6.4	0.9		7.6	3.65		8	6.7
	Cre+	9	16.2	9.3		14.8	7.2		12.75	11		9	7.6	0.9	7.6	0.9		9	7.5	6.6		0.6	2.5		7.05	1.55		9	13.1	7.5		1.7	1.1		10.3	1.4		9	7.4	7.7		1.5	3.7		7.55	2.6		9	5.8
								Cre	9.91	10.33					11.9	1.04								Cre	8.68	1.81								Cre	9.02	2.38								Cre	8.29	3.42
	Cre+/KI+/-	10	12.4	7.8		7.6	7.1	Cre+/KI+/-	10.1	7.35		10	8.4	1.9	8.4	1.9		10	7.6	8.3		1.5	1.2	Cre+/KI+/-	7.95	1.35		10	9.2	6.8		1.4	1.4	Cre+/KI+/-	8	1.4		10	9.9	6.3		2.7	0.6	Cre+/KI+/-	8.1	1.65		10	10.2
[truncated: 47 more columns]

## Sheet: 5i-l von-Frey up and down
		20190424	MOR-KICeA/AAV-Cre										20190424	MOR-KICeA/AAV-Cre						20190425	MOR-KICeA/AAV-Cre										20190427	MOR-KICeA/AAV-Cre										20190429	MOR-KICeA/AAV-Cre
		Baseline	von-Frey	up and down					up and down		up and down		CFA 2h	von-Frey	up and down			up and down		CFA d1	von-Frey	up and down					up and down				CFA d3	von-Frey	up and down					up and down				CFA d5	von-Frey	up and down					up and down
original No.	genotype	lhp	O and X	threshold	O and X	threshold	rhp	O and X	threshold	O and X	threshold		lhp	O and X	threshold	rhp	O and X	threshold		lhp	O and X	threshold	O and X	threshold	rhp	O and X	threshold	O and X	threshold		lhp	O and X	threshold	O and X	threshold	rhp	O and X	threshold	O and X	threshold		lhp	O and X	threshold	O and X	threshold	rhp	O and X	threshold
34#	Cre+	1	OOOXOXOX	0.949	OOOXOOXX	1.103	1	OOOOXOXXO	1.023	OOOOXXOXO	0.831		1	OOOOXXOXO	0.831	1	OOXXOXX	0.221		1	OOOOXXXOO	0.962	OOOXOXOX	0.949	1	OXXOXO	0.125	OXOXXO	0.157		1	OOOXOXOX	0.949	OOOXXOOO	0.833	1	OXOOXX	0.356	OXXOXO	0.125		1	OOOXOOXO	0.843	OOOOXXOXO	0.831	1	OXOXOX	0.283
36#	Cre-	2	OOOXOXOX	0.949	OOOXOXOX	0.949	2	OOOOXOXXO	1.023	OOOXOXOX	0.949		2	OOXOOXO	0.59	2	XOXOXX	0.069		2	OOOXXOOX	0.774	OOOXOXOO	1.028	2	OXOXOX	0.283	OOXXXOX	0.182		2	OOOXOXOX	0.949	OOOOXXXOX	0.715	2	OXOXOO	0.406	OOXOXXO	0.377		2	OOOOXXOXX	0.851	OOXOOOX	0.781	2	OOXXOXO	0.306
11#	Cre+	3	OOOOXXOXX	0.851	OOOXXOOX	0.774	3	OOOXOXOX	0.949	OOOXOXOX	0.949		3	OOOXOXXO	0.731	3	OXOXOX	0.283		3	OOOXOXOX	0.949	OOOXOXOX	0.949	3	OOXXOXO	0.306	OOXOXXX	0.266		3	OOOXXOOX	0.774	OOOXOXOX	0.949	3	OOXOXXO	0.377	OXOXOX	0.283		3	OOOXOOXX	1.103	OOOXOOXO	0.843	3	OXOOXX	0.356
33#	Cre+	4	OOOXOXXO	0.731	OOOXOOXX	1.103	4	OOXOXOO	0.616	OOOXXOOX	0.774		4	OOXOOOX	0.781	4	XOXOXO	0.099		4	OOXOOXO	0.59	OOOXOXXO	0.731	4	OXOXOX	0.283	OXOXOX	0.283		4	OOXOXOO	0.616	OOOOXXOXO	0.831	4	OXXOOX	0.225	OOXOXXX	0.266		4	OOOXXOXX	0.566	OOOOXOXOX	1.425	4	OOXXOXO	0.306
2#	Cre-	5	OOOOXXXOX	0.715	OOOXOXXO	0.731	5	OOOOXXOXO	0.831	OOOXOXOX	0.949		5	OOOOXXOXO	0.831	5	OXOXXO	0.157		5	OOOOXOXXO	1.023	OOXOXOO	0.616	5	XOOXOO	0.326	OOXXOXO	0.306		5	OOOXOXOX	0.949	OOOXOOXX	1.103	5	OXOXXO	0.157	OXOXOX	0.283		5	OOOXOOXX	1.103	OOXOXOO	0.616	5	OXOXOX	0.283
4#	Cre-	6	OOXOOXO	0.59	OOXOXOO	0.616	6	OOOXOXOO	1.028	OOOXXOXO	0.593		6	OOOXXOOX	0.774	6	OXOXOX	0.283		6	OOOXOOXX	1.103	OOOXXXOX	0.474	6	OXOXXX	0.107	OOXXOXX	0.221		6	OOOXOXOO	1.028	OOXOXOO	0.616	6	OXXOOX	0.225	OXXOXX	0.086		6	OOOXOOXX	1.103	OOOXOXOX	0.949	6	OXXOXO	0.125
7#	Cre-	7	OOOXOXOX	0.949	OOOXOXXO	0.731	7	OOOXOXOX	0.949	OOOXOOXX	1.103		7	OOXOXOO	0.616	7	OXOXOX	0.283		7	OOOXOXXO	0.731	OOOXOXOX	0.949	7	OOXXOXO	0.306	OXOXOO	0.406		7	OOOXOOXO	0.843	OOOOXXXOX	0.715	7	OXOXOO	0.406	OXOXOX	0.283		7	OOOOXXOXX	0.851	OOXOOOX	0.781	7	OXXOOX	0.225
61#	Cre+	8	OOOXOXOO	1.028	OOOXOXXO	0.731	8	OOOXOXXO	0.731	OOXOOXO	0.59		8	OOOXOXOX	0.949	8	OXXOXO	0.125		8	OOOXOXXX	0.676	OOOOXXOXX	0.851	8	OXOXOX	0.283	OXOXXO	0.157		8	OOXOXOO	0.616	OOOOXXOXX	0.851	8	OXOXXO	0.157	OXOXXO	0.157		8	OOOXOOXX	1.103	OOOXOXOO	1.028	8	OOXXOXX	0.221
62#	Cre+	9	OOXOOXO	0.59	OOOOXXOXX	0.851	9	OOOXXOXO	0.593	OOOXOOXX	1.103		9	OOOOXXOXO	0.831	9	OXXOOX	0.225		9	OOOOXXOOX	1.162	OOOXOXXO	0.731	9	OXXOOX	0.225	XOOXOX	0.225		9	OOXOXOO	0.616	OOOXOOXO	0.843	9	OXXOXO	0.125	OXOOXX	0.356		9	OOOXOXOX	0.949	OOOXOXOO	1.028	9	OXOXXO	0.157
63#	Cre+/KI+/-	10	OOOXOXOO	1.028	OOOXOOXX	1.103	10	OOXOOXO	0.59	OOXOOXO	0.59		10	OOOOXXXOO	0.962	10	OXOXXO	0.157		10	OOOOXOXXO	1.023	OOOOXXOXX	0.851	10	OXXOXO	0.125	OXOXOO	0.406		10	OOOXOXOX	0.949	OOOXOXOO	1.028	10	OXXOXO	0.125	OXOOXX	0.356		10	OOOXOOXX	1.103	OOOOXXOXO	0.831	10	OOXXOXO	0.306
53#	Cre-	11	OOOXXOOX	0.774	OOOXOOXX	1.103	11	OOOOXXXOX	0.715	OOXOOXO	0.59		11	OOOXOXOX	0.949	11	XOOXXX	0.086		11	OOXOXOO	0.616	OOXOOXX	0.543	11	OOXXOXO	0.306	OXOXOX	0.283		11	OOOXXOOX	0.774	OOXOOXX	0.543	11	XOOXOX	0.225	OXOXOX	0.283		11	OOOXXOXO	0.593	OOOXOXOX	0.949	11	OXOXOX	0.283
65#	Cre-	12	OOOOXXOXX	0.851	OOOXOXXO	0.731	12	OOOXOOXX	1.103	OOOXOOXX	1.103		12	OOOXOXXO	0.731	12	OXOXOX	0.283		12	OOXOXOO	0.616	OOOXOXOX	0.949	12	XOOXOX	0.225	OXOXOX	0.283		12	OOOOXXOXX	0.851	OOOXOOXX	1.103	12	OXOXOX	0.283	OXOXOO	0.406		12	OOXOOOX	0.781	OOOXOOXX	1.103	12	OOXXOOX	0.354
58#	Cre-	13	OOXOXOO	0.616	OOOXOXXX	0.676	13	OOOXXOXO	0.593	OOOXOXXX	0.676		13	OOOXOXXO	0.731	13	OXOXXO	0.157		13	OOOXOOXX	1.103	OOOXOXXO	0.731	13	OXOXOO	0.406	OOXXOXO	0.306		13	OOOXOXOX	0.949	OOOXXOOX	0.774	13	OXOXOX	0.283	OXOOXX	0.356		13	OOOOXXOOX	1.162	OOOXOXXO	0.731	13	OXOXOX	0.283
60#	Cre-	14	OOOXOOXX	1.103	OOOXOXOX	0.949	14	OOOXXOXO	0.593	OOOXOXOX	0.949		14	OOOXXOOO	0.833	14	XOOXXO	0.125		14	OOOXOXOX	0.949	OOOXOOXX	1.103	14	XOOOXO	0.412	OXOXOX	0.283		14	OOOXXOXO	0.593	OOOXOOXX	1.103	14	XOOXOX	0.225	OXOXOO	0.406		14	OOOOXXOXO	0.831	OOXOOOX	0.781	14	OXXOOX	0.225
		Baseline	up and down	up and down									CFA 2h	von-Frey	up and down			up and down		CFA d1	up and down	up and down									CFA d3	up and down	up and down									CFA d5	up and down	up and down
		No.	lhp	rhp									lhp	O and X	threshold	rhp	O and X	threshold		No.	lhp	rhp									No.	lhp	rhp									No.	lhp	rhp
	Cre-	2	0.949	0.986									2	OOXOOXO	0.59	2	XOXOXX	0.069		2	0.901	0.2325									2	0.832	0.3915									2	0.816	0.306
	Cre-	5	0.723	0.89									5	OOOOXXOXO	0.831	5	OXOXXO	0.157		5	0.8195	0.316									5	1.026	0.22									5	0.8595	0.283
	Cre-	6	0.603	0.8105									6	OOOXXOOX	0.774	6	OXOXOX	0.283		6	0.7885	0.164									6	0.822	0.1555									6	1.026	0.141
	Cre-	7	0.84	1.026									7	OOXOXOO	0.616	7	OXOXOX	0.283		7	0.84	0.356									7	0.779	0.3445									7	0.816	0.3155
	Cre-	11	0.9385	0.6525									11	OOOXOXOX	0.949	11	XOOXXX	0.086		11	0.5795	0.2945									11	0.6585	0.254									11	0.771	0.36
	Cre-	12	0.791	1.103									12	OOOXOXXO	0.731	12	OXOXOX	0.283		12	0.7825	0.254									12	0.977	0.3445									12	0.942	0.3655
	Cre-	13	0.646	0.6345									13	OOOXOXXO	0.731	13	OXOXXO	0.157		13	0.917	0.356									13	0.8615	0.3195									13	0.9465	0.2945
	Cre-	14	1.026	0.771									14	OOOXXOOO	0.833	14	XOOXXO	0.125		14	1.026	0.3475									14	0.848	0.3155									14	0.806	0.175
			0.814562	0.859187											0.756875			0.180375			0.83175	0.290063										0.8505	0.293125										0.872875	0.280062
	Cre+	1	1.026	0.927									1	OOOOXXOXO	0.831	1	OOXXOXX	0.221		1	0.9555	0.141									1	0.891	0.2405									1	0.837	0.283
	Cre+	3	0.8125	0.949									3	OOOXOXXO	0.731	3	OXOXOX	0.283		3	0.949	0.286									3	0.8615	0.33									3	0.973	0.355
	Cre+	4	0.917	0.695									4	OOXOOOX	0.781	4	XOXOXO	0.099		4	0.6605	0.283									4	0.7235	0.2455									4	0.9955	0.331
	Cre+	8	0.8795	0.6605									8	OOOXOXOX	0.949	8	OXXOXO	0.125		8	0.7635	0.22									8	0.7335	0.157									8	1.0655	0.2635
	Cre+	9	0.7205	0.848									9	OOOOXXOXO	0.831	9	OXXOOX	0.225		9	0.9465	0.225									9	0.7295	0.2405									9	0.9885	0.22
			0.8711	0.8159											0.8246			0.1906			0.855	0.231										0.7878	0.2427										0.9719	0.2905
		10	1.0655	0.59									10	OOOOXXXOO	0.962	10	OXOXXO	0.157		10	0.937	0.2655									10	0.9885	0.2405									10	0.967	0.2945
[truncated: 66 more columns]

## Sheet: 5-s1b lbx1ki tail immersion
	Lbx1-Cre-/MOR-KI-/-												Lbx1-Cre+/MOR-KI-/-
48°C	12.985	14.515	9.77	9.655	8.605	10.435	7.725	11.75	8.67	8	9.48	8.34	12.375	10.53	10.22	8.805	5.675	8.285	10.895	8.64	10.8	11.685	9.56
50°C	5.75	5.09	4.23	3.965	3.85	6.08	4.005	4.885	5.57	4.265	4.89	5.485	4.285	3.7	3.785	3.825	4.42	5.195	4.53	3.315	4.935	5.97	4.325

## Sheet: 5-s1c lbx1ki hot plate
MOR-KI-/-	Lbx1-Cre+/MOR-KI-/-
25.89	23.815
29.895	18.575
22.72	26.27
29.95	23.545
24.225	15.845
25.11	27.305
20.64	27.94
26.145	24.58
26.3	22.095
21.84	23.44
21.565	22.64
19.845

## Sheet: 5-s1i lbx1flx tail immersion
	Lbx1-Cre-/MOR-flx-/-												Lbx1-Cre+/MOR-flx-/-
Baseline	4.31	3.89	5.095	5.295	4.78	5.09	4.255	4.64	4.765	4.155	4.285		4.795	3.065	3.685	4.235	3.75	4.61	3.86	4.67	4.065	4.065
Morphine	15.985	20	18.155	12.605	18.5	13.97	14.42	13.75	11.735	19.405	14.55		5.69	3.985	4.875	6.325	4.95	3.92	4.14	4.625	4.835	5.175

## Sheet: 5-s1j lbx1flx hot plate
	Lbx1-Cre-/MOR-flx-/-												Lbx1-Cre+/MOR-flx-/-
Baseline	30.955	18.815	23.19	27.185	20.53	35.205	25.12	24.795	24.24	23.285	22.87		25.67	21.675	20.785	18.955	24.41	19.095	29.515	26.22	23.61	18.505
Morphine	45	43.205	39.045	45	37.405	31.97	43.205	45	42.41	33.545	33.265		35.455	15.09	35.595	24.3	23.83	31.515	32.11	26.905	31.065	24.705

[truncated: 4 more sheets: 5-s1kl lbx1flx von frey, s1m-lbx1flx formalin, 5-s1n lbx1flx Hargreaves, 5-s1o lbx1flx von-Frey]
