# Supplementary material for: Different neuronal populations mediate inflammatory pain analgesia by exogenous and endogenous opioids
Source: eLife. 2020 Jun 10;9:e55289. doi: 10.7554/eLife.55289 (PMC7311172; doi:10.7554/eLife.55289)
Supplement: Figure 6—figure supplement 1—source data 1. [file elife-55289-fig6-figsupp1-data1.xlsx]

## Sheet: 6-s1c tail immersion 48 s.c.
tail immersion					MORPHINE: 10mg/ kg, s.c.			cut-off time： 20s
48℃（水浴锅显示45）
			cre+	withdrawal latency (s)						%MPE
GENOTYPE	Mouse NO.	DOB	脚标	Baseline		average	40 mins after morphine		average				weight
SNS-cre/ MOR-KI 10/23/17测			33			5.86667	5.47	6.47	5.97	0.731132			30.7	6.72	5.6	5.28
			29			5.58	4.63	6.07	5.35	-1.59501			22.9	6.1	6.02	4.62
			30			6.5	6.47	5.56	6.015	-3.59259			30.1	6.59	7.44	5.47
			34			6.51667	9.31	7	8.155	12.1508			24.3	6.22	7.52	5.81
			32			5.9	7.38	6.84	7.11	8.58156			23.2	5.88	5.88	5.94
			35			6.95	8.41	6.41	7.41	3.5249			30.6	7.41	7.31	6.13
			36			4.87333	6.09	6.15	6.12	8.24152			25.2	5.71	4.06	4.85
			37			6.47333	7.91	5.84	6.875	2.96944			21	6.96	5.53	6.93
			39			6.53	7	5.97	6.485	-0.334076			28.3	7.94	6.52	5.13
			42			6.55	7.47	5.88	6.675	0.929368			23.6	6.56	6.54
			44			6.32	6.03	6.1	6.065	-1.86404			23.3	7.18	5.94	5.84
			43			7.61333	7.94	8.72	8.33	5.78579			30.8	8.41	8.77	5.66
			41			6.35	6.31	8.97	7.64	9.45055			28.5	6.62	8.4	4.03

## Sheet: 6-s1d hot plate 52 s.c.
Hot plate				MORPHINE: 10mg/ kg s.c.
52℃
		cre+	withdrawal latency (s)				%MPE
GENOTYPE	DOB	脚标	Baseline		average	40 mins after morphine
SNS-cre/ MOR-KI 10/23/17测		33	18.4	18.3	18.35	13.8	-17.0732
		29	21.2		21.2	19.5	-7.14286
		30	21		21	22.8	7.5
		34	17.2		17.2	17.6	1.43885
		32	19.6		19.6	17.5	-8.26772
		35	18.8		18.8	14.8	-15.2672
		36	23.1	16.1	19.6	19.8	0.787402
		37	17.4		17.4	17.3	-0.362319
		39	27.9	21.1	24.5	24	-2.43902
		42	20.7	16.8	18.75	21.1	8.95238
		44	20.6	14.8	17.7	20.7	10.989
		43	17.6	14.8	16.2	14.9	-4.51389
		41	20.7	20.3	20.5	17.7	-11.4286

## Sheet: 6-s1e SNS-cre MOR-KI s.c. vf
	mouse no.	0.07		0.16		0.4		0.6		1		1.4			0.07
12/7/17	35	0	0	0	0	1	2	2	2	4	5	5	5		baseline	after morphine
	36	0	0	0	0	0	1	3	3	4	5	5	5
	34	0	0	0	0	0	0	4	3	5	5	5	5
	32	0	0	0	0	0	1	3	3	5	4	5	5
	30	0	0	0	0	1	0	3	3	5	5	5	5
	33	0	0	1	1	3	3	4	4	5	5	5	5
	39	0	0	0	0	0	0	4	3	5	5	5	5
	41	0	0	0	0	2	1	4	3	5	5	5	5
	43	0	0	0	0	2	3	3	4	5	5	5	5
	44	0	0	1	0	2	2	3	3	5	4	5	5
1/13/18	91	0	0	0	0	1	3	4	4	5	5	5	5
	93	0	0	1	0	1	2	3	3	4	4	5	5
	97	0	0	0	0	2	1	3	3	5	5	5	5

## Sheet: 6-s1f snski tail immersion i.t.
tail immersion					MORPHINE: 1.0 nmol/ 5ul, i.t.				cut-off time： 20s
48℃（水浴锅显示43.5）
			cre+	withdrawal latency (s)							%MPE
GENOTYPE	Mouse NO.	DOB	脚标	Baseline 两次			average	30 mins after morphine 2次		average				weight (g)
SNS-cre MOR-KI 10/25/17测		8/2/17	34	7.89	7.75		7.82	9.41	9.28	9.345	12.5205
			29	8.72	9.9		9.31	8.75	8.78	8.765	-5.09822
			32	11.03	7.5		9.265	9.15	8.75	8.95	-2.93433
			30	9.09	7.87		8.48	9.69	8.16	8.925	3.86285
			33	9.75	8		8.875	10.28	8.85	9.565	6.20225
		8/7/17	35	7	6.87		6.935	9.13	4.62	6.875	-0.459242
			36	7.56	7.19		7.375	6.44	8.09	7.265	-0.871287
			37	8.59	8.59		8.59	7.5	7.25	7.375	-10.6486
		8/15/17	39	5.94	5.35		5.645	6.64	5.19	5.915	1.88088
			42	5.31	5.5		5.405	4.84	6.41	5.625	1.50737
			44	5.25	6.19		5.72	5.59	6.37	5.98	1.82073
			43	6.91	7.88		7.395	7.6	7.66	7.63	1.86434
			41	5.44	4.94		5.19	6.03	6.2	6.115	6.24578

## Sheet: 6-s1g snski hot plate i.t.
Hot plate					MORPHINE: 1 nmol/ 5ul, i.t.
52℃
			cre+	withdrawal latency (s)						%MPE
GENOTYPE	Mouse NO.	DOB	脚标	Baseline		average	30 mins after morphine
SNS-cre MOR-KI 10/25/17测		8/2/17	34	21.5	16	18.75	17.8	17.5	17.65	-4.19048
			29	19.8	18.7	19.25	18.3	14	16.15	-12.0388
			32	20.7	12.9	16.8	11.9	23.7	17.8	3.5461
			30	25.2	15.2	20.2	24.5	19.9	22.2	8.06452
			33	23.2	14.9	19.05	15.8	17.7	16.75	-8.8632
		8/7/17	35	27.2	18.8	23	21.3	24.2	22.75	-1.13636
			36	18.2	26.2	22.2	23.2	19.7	21.45	-3.28947
			37	26.1	27.1	26.6	25.8	24.4	25.1	-8.15217
		8/15/17	39	27.9	23.1	25.5	26.4	24.7	25.55	0.25641
			42	18.8	15.8	17.3		26.3	26.3	32.491
			44	18.5	21.2	19.85	20.7	17.3	19	-3.37972
			43	11.7	24.7	18.2	18.8	20.3	19.55	5.03731
			41	19.7	21.7	20.7	24.5	22.8	23.65	12.1399

## Sheet: 6-s1h SNS-cre MOR-KI i.t.
	mouse no.	0.07		0.16		0.4		0.6		1		1.4			0.07
1/3/18	34	0	0	0	1	1	2	3	4	4	4	5	5		baseline	after morphine
	32	0	0	0	0	1	0	4	2	5	4	5	5
	35	0	0	1	1	2	2	3	4	4	5	5	5
	36	0	0	1	0	2	2	4	4	5	5	5	5
	33	0	0	1	2	3	3	4	3	5	5	5	5
	44	0	0	0	1	1	0	2	2	4	5	5	5
	39	0	0	0	0	0	0	2	4	4	4	5	5
	43	0	0	1	1	3	3	3	3	5	5	5	5
	41	0	0	1	1	1	2	3	3	4	5	5	5
	30	0	0	1	2	3	2	3	3	4	4	5	5
	97	0	0	0	0	2	2	3	3	4	5	5	5
	92	0	0	1	1	2	2	3	4	4	4	5	5
	93	0	0	1	0	3	2	4	4	4	4	5	5
	91	0	0	1	1	3	3	4	4	5	4	5	5

## Sheet: 6-s1i formalin SNS-Cre MOR-KI
							Morphine 10mg/kg, s.c.
							Saline
Experiment date	Video	Number	start time	Date of birth	Mouse NO.	Weight(g)	Treatment	0-5	5-10	10-15	15-20	20-25	25-30	30-35	35-40	40-45	45-50	50-55	55-60	0-10	10-60
6/15/18	Video 161	3	01:25:00	2/7/18	44	28.7	M	115.64	23.27	45.23	73.5	105.5	11.5	39.67	5.94	26.63	24.59	50.05	34.4	138.91	417.01
		4	02:30:00		41	25.1	M	脚出血												0	0
	Video 48	1	0		42	25.7	S	119.39	31.97	53.77	94.42	93.89	60.31	20.11	1.54	2.01	8.65	2.04	0	151.36	336.74
		2	00:30:00		39	29.3	S	115.09	99.24	82.98	128.79	96.08	110.19	38.06	44.14	64.8	0.22	34.13	23.37	214.33	622.76
		3	01:10:00		40	31	M	71.69	4.37	65.25	94.16	79.35	32.34	13.22	17.12	14.77	17.39	1.1	0.69	76.06	335.39
9/23/18	Video 165 20180923	1	00:00:00	7/4/18	5	32.6	S	83.87	44.83	149.99	50.41	22.99	5.84	1.65	0.68	0	0.47	0.97	0.69	128.7	233.69
		2	01:10:00		1	25.7	S	116.18	48.03	73.95	92.78	134.97	133.41	107.09	27	1.13	0.63	34.88	109.42	164.21	715.26
		3	01:50:00		2	32.1	S	83.14	0.22	59.19	29.19	65.68	1.4	2.45	0	0.47	26.98	20.99	8.59	83.36	214.94
		4	02:55:00		6	31.7	M	112.56	14.04	64.22	77.93	82.62	52.32	14.48	45.44	4.5	2.7	43.99	45.93	126.6	434.13
	Video 7	1	00:00:00	7/9/18 7/16/18	9	32.1	M	104.45	9.26	68.13	79.22	110.24	19.58	2.36	0	0.47	0	0.63	0	113.71	280.63
		2	00:30:00		8	27	M	143.46	18.26	3.15	60.87	40.64	25.94	87.88	12.85	7.12	10.07	40.44	12.25	161.72	301.21
		3	01:20:00		11	26	S	148.78	16.68	67.37	100.79	75.76	10.25	6.8	40	85.66	76.66	51.91	1.06	165.46	516.26
		4	01:55:00		10	29.8	S	119.86	34.49	85.18	110.58	79.15	2.46	0.75	53.64	75.11	53.73	0.44	0.4	154.35	461.44
11/14/18	Video 208	1	00:00:00	8/28/18 8/30/18	37	29.2	M	89.37	12.32	72.84	70.37	24.97	46.82	15	86.12	33.17	27.05	39.69	14.91	101.69	430.94
		2	00:30:00		35	28.4	M	77.43	6.98	8.19	18.34	12.65	6.17	81.9	24	6.66	88.44	19.4	1.29	84.41	267.04
		3	02:00:00		36	28.9	S	113.7	23.76	133.45	111.5	66.63	12.3	2.83	32.89	9.84	43.01	0.44	0.63	137.46	413.52
		4	02:50:00		38	30.9	S	76.53	12.72	60.99	49.65	28.11	56.92	2.42	0.44	3.46	22.62	30.99	0.2	89.25	255.8
	Video 17	1	00:00:00	9/5/18	39	27.4	M	117.76	37.49	84.05	115.39	63.4	94.6	31.08	37.12	5.75	40.77	17.95	1.83	155.25	491.94
		2	00:30:00		41	30.4	M	54.23	3.49	73.81	137.76	105.02	76.65	2.04	3.35	126.38	52.78	41.27	105.45	57.72	724.51
		3	01:05:00		40	29.9	M	98.7	11.94	41.54	63.71	43.94	3.83	4.17	25.37	6.15	5.13	11.19	6.21	110.64	211.24
		4	01:50:00		44	28.1	S	115.62	13.85	49.55	33.82	7.45	18.39	68.27	136.72	0	35.59	0.19	0.66	129.47	350.64
	Video 209	1	00:00:00	8/20/18 8/26/18	32	24.4	S	67.75	47.2	106.47	47	113.63	2.36	37.55	0.61	0.4	0.22	0.62	0	114.95	308.86
		2	00:25:00		33	28.1	S	53.59	67.57	100.71	82.98	79.25	9.44	1.58	1.31	0.81	0.68	82.64	23.53	121.16	382.93
		3	01:25:00		29	25.4	M	90.38	8.89	38.25	69.32	86.09	123.55	16.89	28.06	66.48	30.07	4.1	27.26	99.27	490.07
		4	02:10:00		30	29.6	M	111.68	34.52	38.07	104.87	70.32	114.81	46.19	1.5	0.38	0.6	0.6	0.41	146.2	377.75
	Video 18	1	00:00:00		28	27.7	S	69.42	46.94	102.65	32.3	5.23	1.44	1	0.68	0.44	0	0.22	0	116.36	143.96
		2	00:30:00		31	24.3	M	156.11	97.27	93.83	91.98	64.71	42.78	24.32	8.64	65.13	23.05	38.22	3.27	253.38	455.93	第一相太奇怪 delete
		3	01:20:00	9/15/18	46	20.5	S	122.67	28.19	106.68	65.93	110.79	45.83	0.82	27.5	73.07	22.44	18.25	0.68	150.86	471.99
		4	02:55:00		47	24.5	S	128.87	11.01	92.74	134.21	85.24	64.41	0.6	0	0	0.63	67.44	23.34	139.88	468.61
	Video 19	1	00:50:00		49	23.9	M	96.96	44.29	85.04	172.7	28.01	62.9	1.4	56.42	5.03	0.22	0	0	141.25	411.72
		2	0		45	23.6	M	124.65	58.14	37.57	65.58	54.84	62.76	58.57	0.69	0.6	1.11	0.78	33.02	182.79	315.52

## Sheet: 6-s1j von-Frey up and down
20181002		SNS-Cre/MOR-KI			20181003	SNS-Cre/MOR-KI		20181002	SNS-Cre/MOR-KI		20181003	SNS-Cre/MOR-KI		20181003	SNS-Cre/MOR-KI							20181004	SNS-Cre/MOR-KI		SNS-Cre/MOR-KI									20181006	SNS-Cre/MOR-KI		SNS-Cre/MOR-KI									20181008	SNS-Cre/MOR-KI		SNS-Cre/MOR-KI
			Von- Frey		Von- Frey				Von- Frey		Von- Frey				Von- Frey				Von- Frey				Von- Frey		Von- Frey				Von- Frey		Von- Frey				Von- Frey		Von- Frey				Von- Frey		Von- Frey				Von- Frey		Von- Frey
		Baseline		up and down		up and down		Baseline		up and down		up and down		CFA 2h		up and down		CFA 2h		up and down		CFA d1		up and down		up and down		CFA d1		up and down		up and down		CFA d3		up and down		up and down		CFA d3		up and down		up and down		CFA d5		up and down
	No.	lhp	O and X	threshold	O and X	threshold		rhp	O and X	threshold	O and X	threshold		lhp	O and X	threshold		rhp	O and X	threshold		lhp	O and X	threshold	O and X	threshold		rhp	O and X	threshold	O and X	threshold		lhp	O and X	threshold	O and X	threshold		rhp	O and X	threshold	O and X	threshold		lhp	O and X	threshold	O and X
	12	1	OOOXOOXX	1.103	OOOXXOOX	0.774		1	OOOXOOXX	1.103	OOOOXXOXX	0.851		1	OOOXOOXO	0.843		1	OXOOXX	0.356		1	OOOOXXOXX	0.851	OOOXOXOO	1.028		1	OXOXOO	0.406	OXOXXO	0.157		1	OOXOOXO	0.59	OOXXOOO	0.499		1	XOOXXO	0.125	XOOXOX	0.225		1	OOOXOXXO	0.731	OOOOXXOXX
SNS-Cre+/MOR-KI-/-	13	2	OOOOXOXXX	1.015	OOOXOOXX	1.103		2	OOOXOXOX	0.949	OOOXOXOO	1.028		2	OOOOXXOOX	1.162		2	OXOOXX	0.356		2	OOOXOOXO	0.843	OOOXOXOX	0.949		2	OXXOXO	0.125	OOXXOXO	0.306		2	OOOOXXOXO	0.831	OOXOXOO	0.616		2	OOXXOOX	0.354	OOXXXOX	0.182		2	OOOOXXXOO	0.962	OOOXOOXO
	14	3	OOOXOOXO	0.843	OOOOXXOXX	0.851		3	OOOXOXXO	0.731	OOOXOXOO	1.028		3	OOOXOXOX	0.949		3	OXOXOX	0.283		3	OXOOXO	0.42	OOOXOXOX	0.949		3	OXOXXO	0.157	OXOXOX	0.283		3	OOXOOOX	0.781	OOOXOXOX	0.949		3	OXXOOX	0.225	OXOOXX	0.356		3	OOOOXXOXX	0.851	OOOXOXOX
SNS-Cre+/MOR-KI-/-	15	4	OOOXOXOX	0.949	OOOOXXOXX	0.851		4	OOOXOXXO	0.731	OOXOOXO	0.59		4	OOOXOXOO	1.028		4	OXOXXO	0.157		4	OOOXOXOX	0.949	OOOXOXOX	0.949		4	OXOXOX	0.283	OOXXOXX	0.221		4	OOOXXOOX	0.774	OOOXOXOO	1.028		4	XOXOXO	0.099	OOXOXXO	0.377		4	OOOXOOXO	0.843	OOOXOOXX
SNS-Cre+/MOR-KI-/-	16	5	OOOXOOXX	1.103	OOOXOOXX	1.103		5	OOOXOXOX	0.949	OOOOXXOXO	0.831		5	OOOOXOXXO	1.023		5	OOXOXXO	0.377		5	OOOXOOXX	1.103	OOOXOOXO	0.843		5	OXXOXX	0.086	OXOXOX	0.283		5	OOOXOOXX	1.103	OXOOXO	0.42		5	OXOXXO	0.157	XOOXOO	0.32		5	OXOOXO	0.42	OOOXXOOO
	17	6	OOOOXXOOX	1.162	OOOXXOOX	0.774		6	OOOXOOXX	1.103	OOOXOXOO	1.028		6	OOXOXOX	0.437		6	OXXOOX	0.225		6	OOXOXOX	0.437	OOXOXOX	0.437		6	OOXXOXO	0.306	OXOXOX	0.283		6	OOXXOOX	0.354	OOOXOXXX	0.676		6	OXOXOX	0.283	XOOXXO	0.125		6	OOOXOXOX	0.949	OOOOXOXXX
	18	7	OOOXOXOX	0.949	OOOXXOXO	0.593		7	OOOXOOXX	1.103	OOOXOOXX	1.103		7	OOXOOXO	0.59		7	OXXOXX	0.086		7	OOXOXOO	0.616	OOXOOXX	0.543		7	XOOXOX	0.225	OXOXOO	0.406		7	OXOXOO	0.406	OOOXXOXO	0.593		7	OXOOXX	0.356	OOXXOOX	0.354		7	OOXOOXX	0.543	OOOXXOOX
SNS-Cre+/MOR-KI-/-	19	8	OOXOOXX	0.543	OOOXOOXX	1.103		8	OOOXOXOO	1.028	OOXOOXO	0.59		8	OOOXOOXX	1.103		8	OOXXXOO	0.251		8	OOXOXOX	0.437	OOOXOXXO	0.731		8	OXOXOX	0.283	OXOOXX	0.356		8	OOOOXXOXX	0.851	OOOXOXOO	1.028		8	OXOXXO	0.157	OOXOXOX	0.437		8	OOOXOXOO	1.028	OOOXOXOX
SNS-Cre+/MOR-KI-/-	20	9	OOOXOXOO	1.028	OOOXOXOX	0.949		9	OOOXOOXX	1.103	OOXOOXO	0.59		9	OOOXOXOX	0.949		9	XOOXXO	0.125		9	OOXOOXO	0.59	OOOXOOXX	1.103		9	OXOXOX	0.283	OXOXOX	0.283		9	OOOXOXXO	0.731	OOOXXOOX	0.774		9	OXOOXX	0.356	OXOOXO	0.42		9	OOOOXXOOX	1.162	OOOXOOXX
SNS-Cre+/MOR-KI-/-	21	10	OOXOOXX	0.543	OOOXOXOX	0.949		10	OOOXXOOX	0.774	OOOXOOXX	1.103		10	OOXOOXO	0.59		10	OXXOXO	0.125		10	OOOXOOXX	1.103	OOOXOOXX	1.103		10	OXOXOX	0.283	OXOXOX	0.283		10	OOOXOOXX	1.103	OOOXXOOX	0.774		10	XOOXOX	0.225	OXXOOO	0.326		10	OOOXOOXO	0.843	OOOOXXOXX
SNS-Cre+/MOR-KI-/-	22	11	OOOXOXXO	0.731	OOOXOXOO	1.028		11	OXOOXO	0.42	OOOXOXXO	0.731		11	OOXOOXO	0.59		11	XOXOOX	0.178		11	OOXOXOO	0.616	OOOXXOOO	0.833		11	OXOXOX	0.283	OOXOXXO	0.377		11	OOOXXOOX	0.774	OOOXXOOX	0.774		11	XOOXOX	0.225	OOXXXOO	0.251		11	OOOOXXOXO	0.831	OOOOXXOXO
	23	12	OOOXOXOX	0.949	OOOXOXOX	0.949		12	OOXOXOO	0.616	OOOOXXOXX	0.851		12	OOOXOXXO	0.731		12	OXOOXO	0.42		12	OOOXOXOO	1.028	OOXOXOO	0.616		12	OOXXOXO	0.306	OXOOXX	0.356		12	OOXOXOX	0.437	OOOXOXXO	0.731		12	OOXOXXO	0.377	OXXOXO	0.125		12	OOOXOXXO	0.731	OOXOXOX
SNS-Cre+/MOR-KI-/-	24	13	OOOXOXXO	0.731	OOOXOXOX	0.949		13	OOXOOXX	0.543	OOOXOXXO	0.731		13	OOOXOXOX	0.949		13	OXOOXX	0.356		13	OOOXOXOX	0.949	OOXOXOO	0.616		13	OXOXOX	0.283	OOXXOXO	0.306		13	OOOXXOXX	0.566	OOOXOXXO	0.731		13	XOXOOX	0.178	OXOXOO	0.406		13	OOOXOXOO	1.028	OOOXXOXO
	25	14	OOOXOXOO	1.028	OOOXOXOX	0.949		14	OOOOXXOXO	0.831	OOXOOXO	0.59		14	OOOOXXOXO	0.831		14	OOXOXXO	0.377		14	OOOXOOXX	1.103	OOOXOXXO	0.731		14	OXOXOO	0.406	OOXXXOO	0.251		14	OOOOXXOXO	0.831	OOOXOXOX	0.949		14	OOXXOXO	0.306	OXOXOX	0.283		14	OOXOOXX	0.543	OOOXOOXX
	26	15	OOOXOXXO	0.731	OOXOOXO	0.59		15	OOOOXXOXX	0.851	OOOXOOXO	0.843		15	OOOXOXOX	0.949		15	XOOXXO	0.125		15	OOOXXOOX	0.774	OOOOXXXOX	0.715		15	OXOOXX	0.356	OXOXOX	0.283		15	OXOOOX	0.518	OOXOOOX	0.781		15	OXOOXX	0.356	OXOXOX	0.283		15	OOOOXXXOX	0.715	OOOXOXOX
SNS-Cre+/MOR-KI-/-	27	16	OOOXXOOX	0.774	OOXOOXO	0.59		16	OOXOOXX	0.543	OOOXOXOX	0.949		16	OOXOOXO	0.59		16	OXOXOX	0.283		16	OOXOOXO	0.59	OOOXOXOX	0.949		16	OXOXOX	0.283	OXXOOX	0.225		16	OOXOOXX	0.543	OOOXOXOX	0.949		16	OXOOXX	0.356	XOOXOX	0.225		16	OOXOOXO	0.59	OOXOXOO
		Baseline		up and down				Baseline		up and down				CFA 2h		up and down		CFA 2h		up and down		CFA d1		up and down				CFA d1		up and down				CFA d3		up and down				CFA d3		up and down				CFA d5		up and down
	No.	lhp	O and X	threshold				rhp	O and X	threshold				lhp	O and X	threshold		rhp	O and X	threshold		lhp	O and X	threshold				rhp	O and X	threshold				lhp	O and X	threshold				rhp	O and X	threshold				lhp	O and X	threshold
	12	1		0.9385				1		0.977				1	OOOXOOXO	0.843		1	OXOOXX	0.356		1		0.9395				1		0.2815				1		0.5445				1		0.175				1		0.791
	14	3		0.847				3		0.8795				3	OOOXOXOX	0.949		3	OXOXOX	0.283		3		0.6845				3		0.22				3		0.865				3		0.2905				3		0.9
	17	6		0.968				6		1.0655				6	OOXOXOX	0.437		6	OXXOOX	0.225		6		0.437				6		0.2945				6		0.515				6		0.204				6		0.982
	18	7		0.771				7		1.103				7	OOXOOXO	0.59		7	OXXOXX	0.086		7		0.5795				7		0.3155				7		0.4995				7		0.355				7		0.6585
	23	12		0.949				12		0.7335				12	OOOXOXXO	0.731		12	OXOOXO	0.42		12		0.822				12		0.331				12		0.584				12		0.251				12		0.584
	25	14		0.9885				14		0.7105				14	OOOOXXOXO	0.831		14	OOXOXXO	0.377		14		0.917				14		0.3285				14		0.89				14		0.2945				14		0.823
	26	15		0.6605				15		0.847				15	OOOXOXOX	0.949		15	XOOXXO	0.125		15		0.7445				15		0.3195				15		0.6495				15		0.3195				15		0.832
				0.874643						0.902286						0.761429				0.267429				0.732						0.298643						0.649643						0.269929						0.795786
SNS-Cre+/MOR-KI-/-	13	2		1.059				2		0.9885				2	OOOOXXOOX	1.162		2	OXOOXX	0.356		2		0.896				2		0.2155				2		0.7235				2		0.268				2		0.9025
SNS-Cre+/MOR-KI-/-	15	4		0.9				4		0.6605				4	OOOXOXOO	1.028		4	OXOXXO	0.157		4		0.949				4		0.252				4		0.901				4		0.238				4		0.973
SNS-Cre+/MOR-KI-/-	16	5		1.103				5		0.89				5	OOOOXOXXO	1.023		5	OOXOXXO	0.377		5		0.973				5		0.1845				5		0.7615				5		0.2385				5		0.6265
SNS-Cre+/MOR-KI-/-	19	8		0.823				8		0.809				8	OOOXOOXX	1.103		8	OOXXXOO	0.251		8		0.584				8		0.3195				8		0.9395				8		0.297				8		0.9885
SNS-Cre+/MOR-KI-/-	20	9		0.9885				9		0.8465				9	OOOXOXOX	0.949		9	XOOXXO	0.125		9		0.8465				9		0.283				9		0.7525				9		0.388				9		1.1325
SNS-Cre+/MOR-KI-/-	21	10		0.746				10		0.9385				10	OOXOOXO	0.59		10	OXXOXO	0.125		10		1.103				10		0.283				10		0.9385				10		0.2755				10		0.847
SNS-Cre+/MOR-KI-/-	22	11		0.8795				11		0.5755				11	OOXOOXO	0.59		11	XOXOOX	0.178		11		0.7245				11		0.33				11		0.774				11		0.238				11		0.831
SNS-Cre+/MOR-KI-/-	24	13		0.84				13		0.637				13	OOOXOXOX	0.949		13	OXOOXX	0.356		13		0.7825				13		0.2945				13		0.6485				13		0.292				13		0.8105
SNS-Cre+/MOR-KI-/-	27	16		0.682				16		0.746				16	OOXOOXO	0.59		16	OXOXOX	0.283		16		0.7695				16		0.254				16		0.746				16		0.2905				16		0.603
				0.891222						0.787944						0.887111				0.245333				0.847556						0.268444						0.798333						0.280611						0.857167
[truncated: 82 more columns]

## Sheet: 6-s1k Hargreaves
20181002		Baseline	SNS-Cre/MOR-KI										20181003	CFA-2 h	SNS-Cre/MOR-KI									20181004	CFA-d1	SNS-Cre/MOR-KI									20181006	CFA-d3	SNS-Cre/MOR-KI									20181008	CFA-d5	SNS-Cre/MOR-KI
		Hargreaves`		Intensity=10						mean	mean			Hargreaves`		Intensity=10						mean	mean		Hargreaves`		Intensity=10						mean	mean		Hargreaves`		Intensity=10						mean	mean		Hargreaves`		Intensity=10
	No.		left hindpaw				right hindpaw			lhp	rhp				left hindpaw				right hindpaw			lhp	rhp			left hindpaw				right hindpaw			lhp	rhp			left hindpaw				right hindpaw			lhp	rhp			left hindpaw
	12	1	18.7	19.2		1	20	7.5		18.95	13.75			1	6.1	11.3		1	2.5	2.8		8.7	2.65		1	6.8	6.3		1	6.1	3.4		6.55	4.75		1	9.9	6.9		1	1.2	3.9		8.4	2.55		1	7.4	7.8
SNS-Cre+/MOR-KI-/-	13	2	7.4	11.9		2	8.3	19.9	19.1	9.65	15.7667			2	6.1	6.8		2	3.9	1.8		6.45	2.85		2	5.9	6.7		2	1.7	0.9		6.3	1.3		2	10.2	4.5		2	1.1	3.4		7.35	2.25		2	6.5	9.9
	14	3	9.1	5.9		3	10.9	9.6		7.5	10.25			3	6.3	7.3		3	4.1	3.1		6.8	3.6		3	12.1	5.2		3	4.1	3.1		8.65	3.6		3	7.3	14.4		3	2.3	1.9		10.85	2.1		3	11.3	11.1
SNS-Cre+/MOR-KI-/-	15	4	17.5	6.3		4	7.1	7.6		11.9	7.35			4	6.9	12.9		4	1.9	2.2		9.9	2.05		4	4.4	6.6		4	4.3	2.9		5.5	3.6		4	8.6	5.2		4	5.3	3.1		6.9	4.2		4	14.3	9.3
SNS-Cre+/MOR-KI-/-	16	5	8.1	5.9		5	7.8	7.5		7	7.65			5	9.3	9.9		5	2.4	2.9		9.6	2.65		5	5.9	6.4		5	7.9	1.2		6.15	4.55		5	6.3	14.4		5	1.5	3.1		10.35	2.3		5	14.2	10.5
	17	6	14.2	7.8		6	16.2	11.1		11	13.65			6	18.9	8.7		6	1.9	3.9		13.8	2.9		6	4.4	5.5		6	1.9	4.9		4.95	3.4		6	20	3.7	11.3	6	4.7	2.6		11.6667	3.65		6	17.9	14.4
	18	7	12.9	9.3		7	9.9	13.8		11.1	11.85			7	15.6	15.1		7	6.9	8.9		15.35	7.9		7	6.4	18.9	15.8	7	1.3	2.8		13.7	2.05		7	5.6	6.9		7	4.9	2.9		6.25	3.9		7	12.3	8.5
SNS-Cre+/MOR-KI-/-	19	8	10.7	9.5		8	12.5	7.4		10.1	9.95			8	6.8	13.9		8	1.9	2.6		10.35	2.25		8	16.2	4.9		8	3.9	1.9		10.55	2.9		8	7.4	8.7		8	3.1	5.9		8.05	4.5		8	10.5	7.3
SNS-Cre+/MOR-KI-/-	20	9	14.9	16.1		9	17.8	8.8		15.5	13.3			9	13.6	13.5		9	2.5	1.5		13.55	2		9	18.1	5.4		9	9.9	2.5	2.9	11.75	5.1		9	8.7	8.7		9	1.9	9.4	3.1	8.7	4.8		9	7.7	11.6
SNS-Cre+/MOR-KI-/-	21	10	20	8.5		10	6.8	8.9		14.25	7.85			10	10.2	11.8		10	1.2	1.2		11	1.2		10	9.7	9.6		10	9.9	1.8	2.7	9.65	4.8		10	6.3	7.8		10	2.9	1.6		7.05	2.25		10	7.6	10.1
SNS-Cre+/MOR-KI-/-	22	11	15.5	6.3		11	9.9	12.6		10.9	11.25			11	19.2	6.8		11	7.5	3.6		13	5.55		11	7.4	8.9		11	3.1	2.4		8.15	2.75		11	7.3	7.8		11	4.3	4.4		7.55	4.35		11	7.4	7.1
	23	12	10.9	12.2		12	8.7	7.9		11.55	8.3			12	10.4	20		12	1.3	1.5		15.2	1.4		12	17.1	10.8		12	1.3	1.6		13.95	1.45		12	10.9	11.4		12	4.2	7.3		11.15	5.75		12	6.5	7.9
SNS-Cre+/MOR-KI-/-	24	13	14.2	10.1		13	9.2	7.8		12.15	8.5			13	8.7	7.9		13	4.6	2.8		8.3	3.7		13	8.7	13.5		13	2.1	1.3		11.1	1.7		13	8.2	7.8		13	1.9	2.6		8	2.25		13	3.9	5.9
	25	14	8.7	17.1		14	7.7	7.6		12.9	7.65			14	20	6.8		14	0.9	1.9		13.4	1.4		14	12.9	5.9		14	3.2	2.7		9.4	2.95		14	7.9	19.7		14	3.7	7.9		13.8	5.8		14	7.9	8.8
	26	15	6.9	9.1		15	14.2	13.6		8	13.9			15	10.9	17.6		15	8.1	4.5		14.25	6.3		15	11.2	5.9		15	4.9	1.2		8.55	3.05		15	13.9	5.8		15	9.9	4.1		9.85	7		15	16.3	12.6
SNS-Cre+/MOR-KI-/-	27	16	16.3	13.8		16	15.5	8.3		15.05	11.9			16	8.4	11.3		16	1.7	1.5		9.85	1.6		16	14.9	11.5		16	3.8	4.1		13.2	3.95		16	14.6	17.3		16	1.9	2.9		15.95	2.4		16	5.7	4.8
	No.		left hindpaw				right hindpaw			lhp	rhp				left hindpaw				right hindpaw			lhp	rhp			left hindpaw				right hindpaw			lhp	rhp			left hindpaw				right hindpaw			lhp	rhp			left hindpaw
	12	1	18.7	19.2		1	20	7.5		18.95	13.75			1	6.1	11.3		1	2.5	2.8		8.7	2.65		1	6.8	6.3		1	6.1	3.4		6.55	4.75		1	9.9	6.9		1	1.2	3.9		8.4	2.55		1	7.4	7.8
	14	3	9.1	5.9		3	10.9	9.6		7.5	10.25			3	6.3	7.3		3	4.1	3.1		6.8	3.6		3	12.1	5.2		3	4.1	3.1		8.65	3.6		3	7.3	14.4		3	2.3	1.9		10.85	2.1		3	11.3	11.1
	17	6	14.2	7.8		6	16.2	11.1		11	13.65			6	18.9	8.7		6	1.9	3.9		13.8	2.9		6	4.4	5.5		6	1.9	4.9		4.95	3.4		6	20	3.7	11.3	6	4.7	2.6		11.6667	3.65		6	17.9	14.4
	18	7	12.9	9.3		7	9.9	13.8		11.1	11.85			7	15.6	15.1		7	6.9	8.9		15.35	7.9		7	6.4	18.9	15.8	7	1.3	2.8		13.7	2.05		7	5.6	6.9		7	4.9	2.9		6.25	3.9		7	12.3	8.5
	23	12	10.9	12.2		12	8.7	7.9		11.55	8.3			12	10.4	20		12	1.3	1.5		15.2	1.4		12	17.1	10.8		12	1.3	1.6		13.95	1.45		12	10.9	11.4		12	4.2	7.3		11.15	5.75		12	6.5	7.9
	25	14	8.7	17.1		14	7.7	7.6		12.9	7.65			14	20	6.8		14	0.9	1.9		13.4	1.4		14	12.9	5.9		14	3.2	2.7		9.4	2.95		14	7.9	19.7		14	3.7	7.9		13.8	5.8		14	7.9	8.8
	26	15	6.9	9.1		15	14.2	13.6		8	13.9			15	10.9	17.6		15	8.1	4.5		14.25	6.3		15	11.2	5.9		15	4.9	1.2		8.55	3.05		15	13.9	5.8		15	9.9	4.1		9.85	7		15	16.3	12.6
										11.5714	11.3357											12.5	3.73571										9.39286	3.03571										10.281	4.39286
SNS-Cre+/MOR-KI-/-	13	2	7.4	11.9		2	8.3	19.9	19.1	9.65	15.7667			2	6.1	6.8		2	3.9	1.8		6.45	2.85		2	5.9	6.7		2	1.7	0.9		6.3	1.3		2	10.2	4.5		2	1.1	3.4		7.35	2.25		2	6.5	9.9
SNS-Cre+/MOR-KI-/-	15	4	17.5	6.3		4	7.1	7.6		11.9	7.35			4	6.9	12.9		4	1.9	2.2		9.9	2.05		4	4.4	6.6		4	4.3	2.9		5.5	3.6		4	8.6	5.2		4	5.3	3.1		6.9	4.2		4	14.3	9.3
SNS-Cre+/MOR-KI-/-	16	5	8.1	5.9		5	7.8	7.5		7	7.65			5	9.3	9.9		5	2.4	2.9		9.6	2.65		5	5.9	6.4		5	7.9	1.2		6.15	4.55		5	6.3	14.4		5	1.5	3.1		10.35	2.3		5	14.2	10.5
SNS-Cre+/MOR-KI-/-	19	8	10.7	9.5		8	12.5	7.4		10.1	9.95			8	6.8	13.9		8	1.9	2.6		10.35	2.25		8	16.2	4.9		8	3.9	1.9		10.55	2.9		8	7.4	8.7		8	3.1	5.9		8.05	4.5		8	10.5	7.3
SNS-Cre+/MOR-KI-/-	20	9	14.9	16.1		9	17.8	8.8		15.5	13.3			9	13.6	13.5		9	2.5	1.5		13.55	2		9	18.1	5.4		9	9.9	2.5	2.9	11.75	5.1		9	8.7	8.7		9	1.9	9.4	3.1	8.7	4.8		9	7.7	11.6
SNS-Cre+/MOR-KI-/-	21	10	20	8.5		10	6.8	8.9		14.25	7.85			10	10.2	11.8		10	1.2	1.2		11	1.2		10	9.7	9.6		10	9.9	1.8	2.7	9.65	4.8		10	6.3	7.8		10	2.9	1.6		7.05	2.25		10	7.6	10.1
SNS-Cre+/MOR-KI-/-	22	11	15.5	6.3		11	9.9	12.6		10.9	11.25			11	19.2	6.8		11	7.5	3.6		13	5.55		11	7.4	8.9		11	3.1	2.4		8.15	2.75		11	7.3	7.8		11	4.3	4.4		7.55	4.35		11	7.4	7.1
SNS-Cre+/MOR-KI-/-	24	13	14.2	10.1		13	9.2	7.8		12.15	8.5			13	8.7	7.9		13	4.6	2.8		8.3	3.7		13	8.7	13.5		13	2.1	1.3		11.1	1.7		13	8.2	7.8		13	1.9	2.6		8	2.25		13	3.9	5.9
SNS-Cre+/MOR-KI-/-	27	16	16.3	13.8		16	15.5	8.3		15.05	11.9			16	8.4	11.3		16	1.7	1.5		9.85	1.6		16	14.9	11.5		16	3.8	4.1		13.2	3.95		16	14.6	17.3		16	1.9	2.9		15.95	2.4		16	5.7	4.8
										11.8333	10.3907											10.2222	2.65										9.15	3.40556										8.87778	3.25556
