# Supplementary material for: Different neuronal populations mediate inflammatory pain analgesia by exogenous and endogenous opioids
Source: eLife. 2020 Jun 10;9:e55289. doi: 10.7554/eLife.55289 (PMC7311172; doi:10.7554/eLife.55289)
Supplement: Figure 6—source data 1. [file elife-55289-fig6-data1.xlsx]

## Sheet: 6d-rnascope sc
	vgat			vglut2
Lamina I-II	63.9594	50.8728	47.7816	35.533	48.6284	52.2184
Lamina III	53.202	54.9133	59.375	45.3202	43.9306	40.625

## Sheet: 6k-vgaki i.t. tail immersion
				i.t. 1.0 nmol morphine			48度
vgat-cre-/MOR-KI
vgat-cre+/MOR-KI						Time after morphine (min)
experiment date	Mouse NO.	DOB	baseline		average baseline	5	15	30	45	60	90	120	150	180
20171026	63	8/7/17	6.64	5.94	6.29	6	5.78	6.79	5.25	6.44	7.38	5.47	7.06	6.32	6.28
	64		6.69	7.97	7.33	3.28	5.03	4.06	4.94	6.66	5.81	4.06	5.59	6.63	5.22
	62		7.75	6.41	7.08	6.63	5.76	6.41	6.84	6.62	6.75	7.62	7.44	5.93	6.25
	65		6.03	6.56	6.295	8.04	7.75	5.68	6.31	5.25	5.62	7.32	5.63	5.69	5.89
	58	8/2/17	7.91	6.53	7.22	6.92	8.09	8.28	8.12	7.13	7.32	8.06	8.72	7.81	7.09
	57		6.91	4.69	5.8	4.14	4.9	4.25	4.15	6.56	3.96	5.25	5.94	6.01	5
	56		6.75	5.13	5.94	5.81	6.25	6.75	5.07	5.67	7.94	5.97	6.53	5.61
	53		5.35	6.19	5.77	3.5	4.16	3.28	3.06	3.25	4.09	4.47	4.38	5.16	4.9
	51		6.65	5.43	6.04	2.78	3.56	5.19	4.56	4.25	4.25	3.87	3.56	3.9
	52		6.84	6.54	6.69	3.47	4.22	5.19	5.22	4.53	5.6	4.14	6.5	5.35
	55		5.78	7.5	6.64	6.16	5.47	5.69	5.75	6.13	5.85	5.88	7.15	6.9	5.84
	54		7.25	7.25	7.25	6.74	7.41	6.43	6.81	6.96	6.19	6.75	6.63	6.76	6.69
20180115	3	11/1/17 10/27/17	7.84	6.86	7.35	6.09	6.08	6.82	5.6	8.07	5.17	5.87	5.07	3.13
	92		7.79	8.73	8.26	7.68	7.58	8.03	8.27	8.67	6.58	5.63	6.15	5.67
	91		8.15	8.41	8.28	4.44	3.39	4.92	4.81	3.28	3.63	4.41	3.94	3.89
	95		8.31	8.93	8.62	8.13	6.72	7.42	8.41	7.25	6.96	8.68	7.78	7.87
	93		7.47	8.69	8.08	9.61	8.53	8.43	8.46	7.91	9.15	8.65	9.27	9.5
	63					-2.11524	-3.71991	3.64697	-7.5857	1.09409	7.9504	-5.98104	5.61634	0.218818
	64					-31.9653	-18.1531	-25.809	-18.8635	-5.28808	-11.9968	-25.809	-13.7332	-5.52486
	62					-3.48297	-10.2167	-5.18576	-1.85759	-3.56037	-2.55418	4.17957	2.78638	-8.90093
	65					12.7326	10.6166	-4.48741	0.109449	-7.62495	-4.92521	7.47902	-4.85224	-4.41445
	58					-2.34742	6.80751	8.29421	7.04225	-0.704225	0.782473	6.57277	11.7371	4.61659
	57					-11.6901	-6.33803	-10.9155	-11.6197	5.35211	-12.9577	-3.87324	0.985915	1.47887
	56					-0.924609	2.20484	5.76102	-6.18777	-1.92034	14.2248	0.213371	4.1963	-2.34708
	53					-15.9522	-11.3141	-17.4982	-19.0443	-17.7091	-11.806	-9.13563	-9.7681	-4.28672
	51					-23.3524	-17.765	-6.08883	-10.6017	-12.8223	-12.8223	-15.5444	-17.765	-15.3295
	52					-24.1923	-18.5575	-11.2697	-11.0443	-16.2284	-8.18933	-19.1585	-1.4275	-10.0676
	55					-3.59281	-8.75749	-7.11078	-6.66168	-3.81737	-5.91317	-5.68862	3.81737	1.94611
	54					-4	1.2549	-6.43137	-3.45098	-2.27451	-8.31373	-3.92157	-4.86275	-3.84314
	3					-9.96047	-10.0395	-4.18972	-13.834	5.6917	-17.2332	-11.6996	-18.0237	-33.3597
	92					-4.94037	-5.79216	-1.95911	0.0851789	3.49233	-14.3101	-22.402	-17.9727	-22.0613
	91					-32.7645	-41.7235	-28.6689	-29.6075	-42.6621	-39.6758	-33.0205	-37.0307	-37.4573
	95					-4.3058	-16.696	-10.5448	-1.84534	-12.0387	-14.587	0.527241	-7.38137	-6.59051
	93					12.8356	3.77517	2.93624	3.18792	-1.42617	8.97651	4.78188	9.98322	11.9128

## Sheet: 6l-vgatki i.t. hot plate 
vgat-cre-/MOR-KI				i.t. 1.0 nmol morphine			52度 hot plate
vgat-cre+/MOR-KI						Time after morphine (min)
experiment date	Mouse NO.	DOB	baseline		average baseline	15	30	60	90	120	180
20171219	86	10/12/17	23.1	19.1	21.1	27.5	13.7	18.2	19.3	16	18.3
	90		25.3	19.7	22.5	11.6	19.3	19.5	26.1	18.8	25.7
	89		24.5	19	21.75	13.3	17.7	14.1	16.9	20.5	22.1
	85		20.7	13.5	17.1	24.4	15.7	22.1	16.6	19.3	18.1
	88		35.1	24.4	29.75	20.3	19.1	18.2	22.1	22.7	30.3	小鼠体型与littermate比非常小，阈值太高 去掉
	64	8/7/17	15.1	18.5	16.8	11.5	11.9	11.5	9.3	13.5	14.1
	62		18.6	20.4	19.5	19	22.1	20.8	15.8	23.7	16.3
	65		25.7	10.3	18	14.7	18.9	20.9	13.9	21.1	19
20180115	3	11/1/17 11/4/17 10/27/17	16.3	14.5	15.4	8.4	10.3	17.1	14.3	14.5	17.7
	2		14.5	11.5	13	13.3	13.6	14.2	16.6	16.6	15.5
	92		12.8	12.6	12.7	15.2	17.6	17.3	17.1	14.4	12.6
	91		12.5	17.4	14.95	9.1	9.5	10.9	6.2	14.1	17.6
	95		16.8	12.6	14.7	13	14.1	14.8	20.6	13.1	18.2
	93		18.9	21.5	20.2	15.9	20.8	16	19.5	24.2	18.4
	13		24.3	21	22.65	16.4	17.2	19.7	17.5	20.4	24.5
	10		28.9	20.7	24.8	14.8	18.8	20.3	19.7	14.5	17.1
	9		14.1	10.3	12.2	7.6	11.8	13.6	11.4	13.7	11.8
%MPE
	86					26.7782	-30.9623	-12.1339	-7.53138	-21.3389	-11.7155
	90					-48.4444	-14.2222	-13.3333	16	-16.4444	14.2222
	89					-36.3441	-17.4194	-32.9032	-20.8602	-5.37634	1.50538
	85					26.1649	-5.01792	17.9211	-1.79211	7.8853	3.58423
	88					-61.9672	-69.8361	-75.7377	-50.1639	-46.2295	3.60656	delete
	64					-18.7943	-17.3759	-18.7943	-26.5957	-11.7021	-9.57447
	62					-1.96078	10.1961	5.09804	-14.5098	16.4706	-12.549
	65					-12.2222	3.33333	10.7407	-15.1852	11.4815	3.7037
	3					-23.6486	-17.2297	5.74324	-3.71622	-3.04054	7.77027
	2					0.9375	1.875	3.75	11.25	11.25	7.8125
	92					7.73994	15.1703	14.2415	13.6223	5.26316	-0.309598
	91					-19.4676	-18.1364	-13.4775	-29.1181	-2.82862	8.81864
	95					-5.61056	-1.9802	0.330033	19.4719	-5.28053	11.5512
	93					-17.3387	2.41935	-16.9355	-2.82258	16.129	-7.25806
	13					-27.9642	-24.3848	-13.1991	-23.0425	-10.0671	8.2774
	10					-49.505	-29.703	-22.2772	-25.2475	-50.9901	-38.1188
	9					-14.0244	-1.21951	4.26829	-2.43902	4.57317	-1.21951

## Sheet: 6m-vgat-creMOR-KI i.t. von frey
	1.0 nmol/5 ul		morphine
	mouse no.	0.07		0.16		0.4		0.6		1		1.4				0.07
1/6/18	91	0	1	1	3	2	3	3	4	5	5	5	5			baseline	after morphine
	92	0	0	0	0	1	1	2	3	4	4	5	5
	94	0	0	0	1	1	2	1	4	3	4	5	5
	93	0	0	0	0	2	3	3	3	4	4	5	5
	95	0	1	0	1	1	3	3	4	5	5	5	5
	6	0	0	1	0	2	3	4	4	4	5	5	5	delete 基因型不对
	5	0	0	1	2	2	2	2	3	5	4	5	5
	8	0	2	0	3	1	5	2	5	4	5	5	5
	4	0	0	1	0	2	1	3	3	4	3	5	5
	7	0	0	0	0	2	2	3	4	4	5	5	5
	2	0	0	0	0	1	2	3	3	4	4	5	5
	3	0	2	0	3	2	5	4	5	4	5	5	5
	1	0	3	0	5	0	5	2	5	3	5	5	5

## Sheet: 6h-vglut2ki i.t. tail immersion
				i.t. 1.0 nmol morphine			50du
Time	Mouse NO.	DOB	baseline			5	15	30	45	60	90	120	150	180
20171212	73	9/20/17	3.25	3.42	3.335	3.41	3.44	2.94	3.26	3.4	3.31	3.28	2.6	3.66
	75		3.84	3.7	3.77	6.22	6.5	6.81	7.59	6.81	3.69	4.25	4.31	4.32
	76		4.03	3.25	3.64	8.22	4.56	7.44	6.28	6.25	4.9	3.96	3.72	3.56
	74		4.5	3.46	3.98	3.47	4.22	3.63	4.01	3.95	3.5	3.45	4.03	3.68
	61	8/22/17	3.69	3.53	3.61	6.06	4.85	6.78	5.53	5.22	4.78	3.41	4.72	3.94
	68		3.82	4.06	3.94	6.33	4.25	5.28	5.37	6.9	6.88	4.65	3.63	3.34
	69		4.12	3.08	3.6	3.2	3.31	3.59	3.38	3.53	3.1	4	3.79	3.33
	71		2.87	3.62	3.245	2.97	3.7	3.88	2.78	3.37	3.84	2.94	3.4	3.53
	70		3.85	4	3.925	3.68	3.74	3.91	4.05	3.33	3.93	4.34	4.02	4.11
	65	8/23/17	3.31	3.15	3.23	6.35	5	6.31	5.72	6.15	5.81	3.44	3.87	3.84
	63		4	3.96	3.98	3.13	4.22	3.88	4.03	3.61	4.22	4.37	3.22	3.06
	66		3.18	3.07	3.125	6.17	7.59	6.83	7	6.37	7.27	4.45	3.78	3.5
	62		3.03	4.13	3.58	3.39	3.87	4.1	4.29	3.85	3.6	3.97	4.01	3.81
	67		3.1	3.14	3.12	3.54	3.28	3.36	4.08	4.15	4.19	4.24	4.26	4.09
	64		4.02	3.52	3.77	5.08	8.62	7.69	7.27	5.13	4.15	5.63	3.69	3.37
%MPE	73					0.450045	0.630063	-2.37024	-0.450045	0.390039	-0.150015	-0.330033	-4.41044	1.9502
	75					15.0955	16.8207	18.7307	23.5367	18.7307	-0.492914	2.95749	3.32717	3.38879
	76					27.9951	5.62347	23.2274	16.1369	15.9535	7.70171	1.95599	0.488998	-0.488998
	74					-3.18352	1.49813	-2.18477	0.187266	-0.187266	-2.99625	-3.30836	0.31211	-1.87266
	61					14.9481	7.56559	19.3411	11.7145	9.82306	7.1385	-1.22026	6.77242	2.01342
	68					14.8817	1.93026	8.34371	8.90411	18.4309	18.3064	4.42092	-1.93026	-3.73599
	69					-2.43902	-1.76829	-0.0609756	-1.34146	-0.426829	-3.04878	2.43902	1.15854	-1.64634
	71					-1.6413	2.71561	3.78991	-2.77529	0.746046	3.55118	-1.82035	0.925097	1.70098
	70					-1.52411	-1.15086	-0.0933126	0.777605	-3.7014	0.0311042	2.58165	0.59098	1.15086
	65					18.6047	10.5546	18.3661	14.8479	17.412	15.3846	1.25224	3.81634	3.63745
	63					-5.30587	1.49813	-0.62422	0.31211	-2.30961	1.49813	2.43446	-4.74407	-5.74282
	66					18.0444	26.4593	21.9556	22.963	19.2296	24.563	7.85185	3.88148	2.22222
	62					-1.15713	1.76614	3.16687	4.324	1.64434	0.121803	2.37515	2.61876	1.40073
	67					2.48815	0.947867	1.4218	5.6872	6.1019	6.33886	6.63507	6.75355	5.74645
	64					8.07147	29.8829	24.1528	21.565	8.37954	2.34134	11.4603	-0.492914	-2.46457

## Sheet: 6i-vglut2ki i.t. hot plate
				i.t. 1.0 nmol morphine			52du hot plate
	Mouse NO.	DOB	baseline			15	30	60	90	120	180
20171212	73	9/20/17	18.5	19.3	18.9	19.9	19.2	21.4	17.4	25.1	26.7
	75		18.9	18.5	18.7	30.1	25.6	30.9	25.8	20.4	20.8
	76		19.5	23.7	21.6	26.7	27.6	25.9	18.4	21.5	24.1
	74		12.7	14.4	13.55	12.7	13.9	20.8	8.9	8.6	16.7
	61	8/22/17	20.1	18.1	19.1	43.5	30.9	37.9	24.9	15.3	20.4
	68		15.1	14.7	14.9	17.5	20.7	28.2	16.8	17.6	21.1
	69		14	13.8	13.9	12.9	14.2	15.4	14.8	14.8	19
	71		19.1	20.7	19.9	20.9	15.7	17.8	25.5	24.9	20.5
	70		16.8	18.6	17.7	17.9	21.5	17.5	15.1	24.6	15.6
	65	8/23/17	25	19	22	21.5	43.6	22.3	25.5	30.6	20.4
	63		14.2	16.6	15.4	17.2	19.8	19.4	13.1	14.4	9.8
	66		16.5	13.5	15	30.5	26.8	42	14.8	26.2	14.2
	62		12.9	18.5	15.7	15.3	19	17.8	17.3	18.5	14.1
	67		22.5	13.5	18	18.1	9.8	21.7	14.6	16.2	18.8
	64		18.1	15.1	16.6	34	25.9	24.4	20	18.5	17.7
%MPE	73					3.83142	1.14943	9.57854	-5.74713	23.7548	29.8851
	75					43.346	26.2357	46.3878	26.9962	6.46388	7.98479
	76					21.7949	25.641	18.3761	-13.6752	-0.42735	10.6838
	74					-2.7027	1.11288	23.0525	-14.7854	-15.7393	10.0159
	61					94.2085	45.5598	72.5869	22.3938	-14.6718	5.01931
	68					8.63787	19.2691	44.186	6.31229	8.9701	20.598
	69					-3.21543	0.96463	4.82315	2.89389	2.89389	16.3987
	71					3.98406	-16.7331	-8.36653	22.3108	19.9203	2.39044
	70					0.732601	13.9194	-0.732601	-9.52381	25.2747	-7.69231
	65					-2.17391	93.913	1.30435	15.2174	37.3913	-6.95652
	63					6.08108	14.8649	13.5135	-7.77027	-3.37838	-18.9189
	66					51.6667	39.3333	90	-0.666667	37.3333	-2.66667
	62					-1.36519	11.2628	7.16724	5.46075	9.55631	-5.46075
	67					0.37037	-30.3704	13.7037	-12.5926	-6.66667	2.96296
	64					61.2676	32.7465	27.4648	11.9718	6.69014	3.87324
						0

## Sheet: 6j-vglut2KI i.t. von frey
	i.t. 1.0 nmol morphine
	mouse no.	0.07		0.16		0.4		0.6		1		1.4			0.07
1/4/18	59	0	0	0	0	1	0	2	0	4	0	5	0		baseline	after morphine
	56	0	0	0	0	1	3	3	4	5	5	5	5
	60	0	0	1	1	2	1	3	2	4	4	5	5
	55	0	0	2	1	3	3	5	4	5	4	5	5
	57	0	0	1	0	3	0	4	0	5	0	5	1
	58	0	0	0	0	3	3	4	5	5	5	5	5
	64	0	0	1	0	2	0	4	0	5	1	5	1
	66	0	0	0	0	1	0	2	0	4	0	5	0
	65	0	0	0	0	1	0	3	0	5	0	5	0
	67	0	0	0	0	2	1	3	3	5	5	5	5
	62	0	0	1	1	2	2	3	3	5	4	5	5
	63	0	0	1	1	1	1	3	2	4	5	5	5
	60	0	0	0	0	1	2	3	3	4	4	5	5
	69	0	0	1	1	2	2	3	3	5	4	5	5
	61	0	0	0	0	1	0	3	0	5	0	5	0
	71	0	0	0	0	2	3	3	4	5	5	5	5
	68	0	0	2	0	3	0	4	0	5	0	5	2

## Sheet: 6o-vgat-creMOR-KI i.t. morphine
													vgat-cre MOR-KI
													MOR-KI
Video	Mouse NO.	licking	mean licking	flinching	mean flinching	body twisting	mean twisting	tail biting	mean tail biting	grooming	mean grooming	scratching	mouse NO.		drug (i.t.)	lick+flinch	groom+tail lick	groom average		lick average
20170710	1	0.17	0.17	0.22	0.22	11.78	0.38	16.67	3.33	120.72	3.81	0	89		morphine+beta-FNA	0.39	137.39	265.047		8.59125
	2	0	0	0.78	0.26	14.67	0.81	12	12	105.22	3.19	1	93		morphine+beta-FNA	0.78	117.22
20170727-1	1	30.94		0.89		1.56		0		330.78		0	2		morphine+beta-FNA	31.83	330.78
	2	31.28		0.33		0		5.39		539.06		10	22		morphine+beta-FNA	31.61	544.45
20170727-2	1	1.17	0.58	0	0	33	0.83	16.17	1.47	186.44	4.93	6	5		morphine+beta-FNA	1.17	202.61
	2	0	0	0	0	40	1.11	82.22	4.33	171.5	5.2	0	6		morphine+beta-FNA	0	253.72
20170727-3	1	0	0	0.17	0.17	5.94	0.99	9.94	3.31	312.61	8.02	0	9		morphine+beta-FNA	0.17	322.55
video 1039	1	0	0	1.11	0.37	490.39	5.81	0	0	122.22	9.4	0	69		morphine	1.11	122.22	428.872		139.206
	2	0	0	0.39	0.39	6.89	1.38	20	6.67	142.78	6.21	26	68		morphine	0.39		470.221		35.717
video 1048	1	0.61	0.61	2.17	0.31	5.56	1.39	57.94	9.66	153.72	12.81	0	78		morphine+beta-FNA	2.78	211.66
	2	3	1	0	0	0	0	6.78	6.78	699.61	16.66	9	80		morphine	3	706.39
video 519	1	5.06	1.69	12.17	0.87	187.33	3.07	0	0	594.33	22.01	0	87		morphine	17.23	594.33
	2												88
	3	0	0	0	0	0	0	22.33	3.19	95.67	14.1	21	89		morphine	0	118
video 521	1	163.06	12.54	0.5	0.5	573.06	3.93	26.83	3.83	458.89	5.96	3	79		morphine	163.56	485.72
	2	2.67	2.67	0.94	0.94	284.61	3.56	0	0	498.5	9.59	3	80		morphine	3.61	498.5
	3	0	0	1.61	0.32	424.11	5.58	0	0	445.28	9.9	0	81		morphine	1.61	445.28
cage1 1&2	1	65.5	9.36	0	0	0	0	7.17	7.17	459.89	16.42	0	71		morphine	65.5	467.06
	2	374.06	6.03	23.61	0.84	434.56	3	100.22	3.85	213.61	4.85	2	62		morphine	397.67	313.83
cage1 3&4	3	8.78	8.78	0	0	47.22	1.35	45.22	3.01	319.83	7.27	0	63		morphine	8.78	365.05
	4	11.22	11.22	0	0	0	0	0	0	397.22	7.49	9	64		morphine	11.22	397.22
20180408	1	233.67	8.06	18.5	0.93	554.22	4.43	3.22	1.61	385.89	3.98	26	68		morphine	252.17	389.11
	2	62.67	8.95	18.94	1	397.67	4.32	15.72	1.75	461.28	8.87	4	69		morphine	81.61	477
	3	62.89	4.19	38.33	1.28	499.39	4.71	35.78	3.25	608.28	7.9	15	80		morphine	101.22	644.06
	4	19.12	19.12	1.33	0.33	2.61	1.31	27.17	5.43	418.67	14.95	5	78		morphine	20.45	445.84
	5	101.83	9.26	4.94	0.45	0.39	0.39	16.5	16.5	511.61	12.48	71	77		morphine	106.77	528.11
	6	136.28	6.81	0.17	0.17	0	0	32.22	10.74	626.83	12.29	29	79		morphine	136.45	659.05
cage1&2 5	1	4.61	4.61	0	0	0	0	34.33	4.9	510.94	8.66	40	65		morphine	4.61	545.27
	2	143.78	5.99	2.56	0.43	528.28	3.57	1.39	1.39	317.28	5.67	3	72		morphine	146.34	318.67
video 198	1	0	0	0	0	0	0	0	0	219.67	5.94	20			morphine	0	219.67
	2	0	0	0	0	0	0	44.83	7.47	219	5.92	18			morphine	0	263.83

## Sheet: 6p-c-fos
date	mouse NO.	image	section	c-fos NO.					date	mouse NO.	c-fos NO.
20171217	53 1.0nmol morphine vgat/ki	48	1	23					20180423	68 1.0nmol morphine vgat/ki	36
			2	35							42
		50	1	15							32
			2	7							21
			3	18							27
			4	33							32
		49	1	19							35
			2	24							39
			3	26							27
			4	30							35
			5	41							34
			6	18							48
		51	1	27						average	34
			2	38						69 1.0nmol morphine vgat/ki	41
			3	32							39
			4	34							50
			5	20							42
			6	27	25.9444						46
	67 1.0nmol morphine vgat/ki	52	1	32							27
			2	28							41
			3	31							63
			4	33							32
		53	1	41							31
			2	32							42
			3	33							39
			4	32						average	41.0833
		54	1	33						80 1.0nmol morphine vgat/ki	28
			2	29							39
			3	29							48
			4	22							40
		55	1	29							33
			2	23							45
			3	24	30.0667						35
	70 1.0nmol morphine vgat/ki	31	1	36							33
			2	36						average	37.625
			3	30						81 saline vgat/ki	6
			4	26							10
		32	1	33							12
			2	24							4
			4	25							6
		33	1	26							5
			2	28							9
			3	29							5
		34	1	31							2
			2	35							7
			3	19							4
			4	22	28.5714						6
	69 saline vgat/ki	35	1	9						average	6.33333
			2	3						85 saline vgat/ki	9
			3	4							12
			4	7							8
		36	1	3							8
			2	4							4
			3	2							10
			4	9						average	8.5
			5	4						86 saline vgat/ki	21
			6	5							16
		37	1	2							17
			2	3							21
			3	6							9
			4	3							3
			5	1							17
			6	2							30
		38	1	1							12
			2	5							12
			3	3	4						6
	71 saline vgat/ki	39	1	3							6
			2	17						average	14.1667
			3	1						88 1.0nmol morphine vgat/ki	19
			4	5							10
			5	12							29
		40	1	2							26
			2	13							29
			3	13							29
			4	5							20
			5	4							28
		41	2	3							27
			3	12							31
			4	10							20
		42	1	9							32
			2	4						average	25
			3	10	7.6875
	56 1.0nmol morphine MOR-KI	43	1	13
			2	15
			3	11
			3	5
			4	12
			5	11
			6	13
			7	13
			8	13
		44	1	5
			2	9
			3	9
			4	7
			5	8
			6	14
			7	10
		45	1	1
			2	6
			3	8
			4	5
			5	1
			6	8
			7	10
		46	1	3
			2	14
			3	3
			4	4
			5	10
			6	4	8.44828
	55 1.0nmol morphine MOR-KI	56	1	4
			2	3
			3	10
		57	1	1
			2	6
			3	4
			4	13
			5	13
		58	1	8
			2	5
			3	10
			4	4
			5	6
			6	6
		59	1	10
			2	7
			3	11
			4	4
			5	12
			6	14	7.55
	58 saline MOR-KI	60	1	5
			2	4
			3	9
			4	3
			5	11
			6	11
		61	1	1
			2	6
			3	8
			4	9
			5	5
			6	8	6.66667
20161215	vgat/KI 1.0nmol morphine	1		30
				19
				35
				32
				40
				22
				23
		2		21
				55
				27
				28
				33
				15
				24
		3		24
				28
				25
				30
				13
		4		30
				36
				25
				34
				32
				25
				20
		5		23
				33
				21
				20
				34
		6		43
				34
				39
				41
				17
				21
				20	28.2105
	MOR-KI 1.0nmol morphine	7		9
				9
				17
				11
				11
				7
				9
		8		11
				1
				10
				6
				15
				10
				5
		9		10
				6
				19
				15
				12
		10		4
				2	9.85
20160607	vgat-cre MOR-KI 1.0nmol morphine i.t.			27
				37
				28
				24
				30
				30
				37
				36
				32
				34
				30
				23
				29
				33
				30
				22
				28
				31	30.0556
20180201	94 saline vgat/ki		1	8
			2	8
			3	3
			4	7
			5	4
			6	9
			7	6
			8	5
			9	6
			10	3
			11	5
			12	12
			13	2
			14	6
			15	6
			16	4
			17	1
			18	9
			19	2
			20	2
			21	0
			22	5
			23	2
			24	3
			25	4	4.88
	95 saline vgat/ki	95 saline vgat/ki	1	4
			2	11
			3	10
			4	2
			5	8
			6	3
			7	3
			8	9
			9	11
			10	6
			11	5
			12	2
			13	4
			14	9
			15	9
			16	4
			17	8
			18	8
			19	8
			20	7
			21	9
			22	4
			23	1
			24	8
			25	2
			26	5	6.15385

## Sheet: 6s-c-fos beads
		1-2 c-fos	3-5 c-fos	total c-fos	1-2 beads	1-2 co-beads	%1-2 beads	3-5 beads	3-5 co-beads	% layer 3 beads
68+m	20180423 68+m beads c-fos-1	36	6	42	9	3	33.3333	7	1	14.2857
	20180423 68+m beads c-fos-2	42	13	55	8	4	50	7	4	57.1429
	20180423 68+m beads c-fos-3	32	13	45	12	1	8.33333	4	1	25
	20180423 68+m beads c-fos-4	21	14	35	7	3	42.8571	4	1	25
	20180423 68+m beads c-fos-5	27	27	54	9	3	33.3333	6	4	66.6667
	20180423 68+m beads c-fos-6	32	19	51	11	1	9.09091	3	2	66.6667
	20180423 68+m beads c-fos-7	35	21	56	6	2	33.3333	4	1	25
	20180423 68+m beads c-fos-8	39	17	56	13	3	23.0769	4	1	25
	20180423 68+m beads c-fos-9	27	27	54	7	1	14.2857	5	4	80
	20180423 68+m beads c-fos-10	35	15	50	9	5	55.5556	4	1	25
	20180423 68+m beads c-fos-11	34	23	57	9	2	22.2222	6	2	33.3333
	20180423 68+m beads c-fos-12	48	20	68	11	1	9.09091	1	0	0
		34	17.9167	51.9167	111	29	26.1261	55	22	40
69+m	20180423 69+m beads c-fos-1	41	20	61	6	3	50	4	1	25
	20180423 69+m beads c-fos-2	39	14	53	9	2	22.2222	4	0	0
	20180423 69+m beads c-fos-3	50	11	61	8	1	12.5	8	3	37.5
	20180423 69+m beads c-fos-4	42	14	56	6	1	16.6667	1	0	0
	20180423 69+m beads c-fos-5	46	7	53	9	1	11.1111	3	0	0
	20180423 69+m beads c-fos-6	27	9	36	6	0	0	4	0	0
	20180423 69+m beads c-fos-7	41	10	51	9	0	0	8	1	12.5
	20180423 69+m beads c-fos-8	63	20	83	9	2	22.2222	5	3	60
	20180423 69+m beads c-fos-9	32	25	57	9	1	11.1111	3	3	100
	20180423 69+m beads c-fos-10	31	23	54	7	0	0	4	1	25
	20180423 69+m beads c-fos-11	42	3	45	6	1	16.6667	4	0	0
	20180423 69+m beads c-fos-12	39	14	53	11	1	9.09091	4	1	25
		41.0833	14.1667	55.25	95	13	13.6842	52	13	25
80+m	20180423 80+m beads c-fos-1	28	20	48	3	0	0	4	0	0
	20180423 80+m beads c-fos-2	39	27	66	5	0	0	5	1	20
	20180423 80+m beads c-fos-3	48	30	78	6	1	16.6667	5	1	20
	20180423 80+m beads c-fos-4	40	18	58	7	2	28.5714	5	3	60
	20180423 80+m beads c-fos-5	33	44	77	8	3	37.5	3	1	33.3333
	20180423 80+m beads c-fos-6	45	12	57	8	3	37.5	3	1	33.3333
	20180423 80+m beads c-fos-7	35	14	49	7	0	0	2	1	50
	20180423 80+m beads c-fos-8	33	33	66	5	0	0	6	2	33.3333
		37.625	24.75	62.375	49	9	18.3673	33	10	30.303
81+s	20180423 81+s beads c-fos-1	6	2	8	8	0		4	0
	20180423 81+s beads c-fos-2	10	2	12	8	0		4	0
	20180423 81+s beads c-fos-3	12	3	15	11	0		2	0
	20180426 81+s c-fos beads-1	4	8	12	6	0		3	0
	20180426 81+s c-fos beads-2	6	4	10	5	1		5	0
	20180426 81+s c-fos beads-3	5	2	7	8	1		2	0
	20180426 81+s c-fos beads-4	9	5	14	3	0		7	0
	20180426 81+s c-fos beads-5	5	6	11	4	0		5	0
	20180426 81+s c-fos beads-6	2	3	5	5	0		8	0
	20180426 81+s c-fos beads-7	7	4	11	8	0		2	0
	20180426 81+s c-fos beads-8	4	2	6	7	0		6	0
	20180426 81+s c-fos beads-9	6	2	8	8	1		6	0
		6.33333	3.58333	9.91667	81	3	3.7037	54	0	0
85+s	20180423 85+s beads c-fos-1	9	5	14	8	0		4	0
	20180423 85+s beads c-fos-2	12	0	12	5	0		3	0
	20180423 85+s beads c-fos-3	8	2	10	8	1		4	0
	20180423 85+s beads c-fos-4	8	2	10	7	0		3	0
	20180423 85+s beads c-fos-5	4	3	7	6	0		3	0
	20180423 85+s beads c-fos-6	10	2	12	6	0		4	0
		8.5	2.33333	10.8333	40	1	2.5	21	0	0
86+s	20180423 86+s beads c-fos-1	21	8	29	8	0		6	0
	20180423 86+s beads c-fos-2	16	9	25	7	0		5	0
	20180423 86+s beads c-fos-3	17	16	33	7	0		4	0
	20180426 86+s c-fos beads-1	21	4	25	6	1		4	0
	20180426 86+s c-fos beads-2	9	6	15	3	0		2	0
	20180426 86+s c-fos beads-3	3	2	5	9	1		3	0
	20180426 86+s c-fos beads-4	17	2	19	9	1		4	0
	20180426 86+s c-fos beads-5	30	21	51	7	0		8	1
	20180426 86+s c-fos beads-6	12	2	14	11	0		4	0
	20180426 86+s c-fos beads-7	12	6	18	7	0		2	0
	20180426 86+s c-fos beads-8	6	10	16	7	0		2	0
	20180426 86+s c-fos beads-9	6	17	23	9	1		4	0
		14.1667	8.58333	22.75	90	4	4.44444	48	1	2.08333
88+m	20180426 88+m beads c-fos-1	19	11	30	5	0		2	0
	20180426 88+m beads c-fos-2	10	8	18	5	1		3	0
	20180426 88+m beads c-fos-3	29	4	33	9	1		3	0
	20180426 88+m beads c-fos-4	26	13	39	7	1		4	2
	20180426 88+m beads c-fos-5	29	13	42	9	0		4	1
	20180426 88+m beads c-fos-6	29	11	40	4	0		5	0
	20180426 88+m beads c-fos-7	20	18	38	7	1		4	0
	20180426 88+m beads c-fos-8	28	7	35	7	1		4	1
	20180426 88+m beads c-fos-9	27	15	42	6	0		8	0
	20180426 88+m beads c-fos-10	31	8	39	10	1		5	1
	20180426 88+m beads c-fos-11	20	4	24	9	0		3	0
	20180426 88+m beads c-fos-12	32	16	48	4	1		4	1
		25	10.6667	35.6667	82	7	8.53659	49	6	12.2449		beads 太少
				0
