# Supplementary material for: Different neuronal populations mediate inflammatory pain analgesia by exogenous and endogenous opioids
Source: eLife. 2020 Jun 10;9:e55289. doi: 10.7554/eLife.55289 (PMC7311172; doi:10.7554/eLife.55289)
Supplement: Figure 7—source data 1. [file elife-55289-fig7-data1.xlsx]

## Sheet: 7d
	EYFP						GCaMP6s
Tail pinch	-0.1613	-5.6214	-2.3797	0.1588	-1.0511		17.3477	17.6268	4.5283	10.6601	3.8567	13.1541	26.0546	9.5636	13.7815	10.2846	5.9713	3.4284	7.3525	42.6746	14.418
Hindpaw pinch	0.0772	-0.6178	0.0367	-0.1439	-0.2836		4.872	3.6253	19.4216	10.8785	5.3467	3.8298	25.1484	3.916	10.7901	3.2783	1.5739	3.6444	-0.204	21.5843	8.5985
40 C water	-0.1682	-0.0439	-0.113	-0.4703	0.0218		-0.2196	-0.7512	0.0484	-0.0114	-1.6243	0.31	-0.0512	3.0867	-0.0906	0.545	0.8576	-1.2871	1.3336	-8.8108	1.0492
52 C water	-0.515	-1.9568	-0.8112	0.0231	0.0908		1.103	2.7744	6.4078	9.8438	0.6546	7.2738	7.8143	4.2088	-1.316	9.9826	6.924	4.0699	3.8762	26.326	21.019

## Sheet: 7e
Basal response	Morphine 40 min	Morphine 5 h
4.4829	-2.417	3.048
10.0858	4.4203	8.9057
16.35	5.8933	13.3352
12.8531	7.2016	10.8936
4.5309	3.5581	3.1374
18.8241	12.1387	16.6188
9.9183	2.3649	5.9978
35.6439	9.02	28.1362
10.5076	4.6322	14.6866

## Sheet: 7j-k cre virus into PB formalin
							Morphine 10mg/kg, s.c.
							Saline
Experiment date	Video	Number	start time	Date of birth	Mouse NO.	Weight(g)	Treatment	0-5	5-10	10-15	15-20	20-25	25-30	30-35	35-40	40-45	45-50	50-55	55-60	0-10	10-60
8/1/18	Video 177	1	0	4/27/18	36	32.4	M	103.21	19.33	43.17	33.02	126.42	20.49	72.88	3.13	6.18	3.96	65.51	1.39	122.54	376.15	36	一侧没有病毒
		2	00:35:00		33	32.1	M	118.04	8.01	90.61	137.99	79.23	6.02	45.82	26.97	5.76	23.1	36.19	30.54	126.05	482.23	33	good
		4	01:10:00		34	31	M	101.63	14.66	53.6	57.68	38.65	60.61	64.9	4.85	12.3	30.62	3.22	4.1	116.29	330.53	34	OK
10/16/18	Video 14	1	0	6/24/18	4	31.5	M	45.03	1.27	3.54	60.45	4.05	10.7	1.43	17.37	26.7	1.32	0.46	0.26	46.3	126.28	4	good	6
		2	00:45:00		5	28.1	M	132.87	27.33	68.68	118.61	45.26	9.47	116.52	23.52	17.47	1.67	1.66	20	160.2	422.86	5	good
		3	01:40:00		1	29.1	M	88.52	3.53	53.91	75.89	46.51	7.34	3.19	14.87	16.52	5.77	56.41	9.76	92.05	290.17	1	good
		4	02:20:00		2	33.6	M	80.51	36.3	22.36	75.77	24.58	1.95	39.55	49.09	1.81	1.22	1.46	0.67	116.81	218.46	2	good
	Video 205	1	00:00:00		3	30.5	M	90.56	26.15	63.33	76.41	46.19	12.12	39.39	7.27	1.28	44.84	51.25	1.78	116.71	343.86	3	good
		2	00:30:00		6	32.1	M	83.42	4.43	59.85	69.46	82.97	43.13	1.99	1.17	51.77	5.08	1.65	17.97	87.85	335.04	6	good
		3	01:45:00	5/25/18 6/15/18	45	33.3	M	42.94	22.33	34.51	41	27.6	10.21	7.93	6.15	5.3	2.33	2.13	3.96	65.27	141.12	45	两侧少, delete
		4	02:25:00		40	31.8	M	96.07	35.41	169.25	105.46	89.65	46.31	43.56	11.38	1.91	0	0.22	0.25	131.48	467.99	40	一侧没有病毒
	Video 15	1	00:00:00		42	32.8	M	83.45	13.39	21.6	61.01	62.72	7.71	17.66	27.5	3.09	2.84	0	0.96	96.84	205.09	42	一侧没有病毒
		2	00:25:00		47	32.1	M	85.52	7.74	9.05	7.56	4.56	20.65	2.56	4.79	1.87	1.04	70.66	1.88	93.26	124.62	47	good
		3	01:00:00		38	28.2	M	70.78	10.25	2.59	32.6	87.64	15.8	30.16	10.31	1.83	17.99	55.08	32.28	81.03	286.28	38	OK
		4	01:50:00	7/19/18	1	26.3	M	70.31	42.75	91.48	75.53	98.7	34.96	12.13	39.02	42.79	0.21	71.65	19.67	113.06	486.14	1	ok 一侧表达不好	5
	Video 206	1	00:00:00		3	26.5	M	91.17	0.72	40.27	46.34	25.65	18.59	1.81	0.31	5.76	29.24	14.84	0.28	91.89	183.09	3	表达到DRN delete
		2	00:35:00		2	26.4	M	88.93	8.75	83.46	83.78	21.82	21.84	36.36	17.08	2.38	5.38	4.87	18.18	97.68	295.15	2	ok 一侧表达不好
		3	01:10:00		4	26.5	M	130.2	6.4	117.56	99.53	45.32	67.78	62.12	40.25	3.69	47.89	27.05	10.85	136.6	522.04	4	good
		4	01:45:00		5	26.3	M	106.77	64.09	48.79	56.73	63.72	83.97	59.09	11.62	15.45	36	13.64	22.66	170.86	411.67	5	good
11/28/18	Video 209 20181128	1	00:00:00	8/20/18 8/24/18	17	31.7	M	86.32	20.93	91.64	90.59	124.88	5.31	12.78	39.32	32.6	1.35	1.16	54.3	107.25	453.93	17	good	1
		2	00:40:00		14	37.5	M	68.89	6.97	11.06	26.36	32.67	18.32	2.82	7.36	39.29	3.75	2.75	1.13	75.86	145.51	14	good
		3	02:00:00		18	30	S	82.03	4.48	40.91	85.92	16.64	59.74	5.28	1.48	1.28	1.96	62.74	14.46	86.51	290.41	18	good
		4	02:40:00	8/17/18	40	32.1	M	100.4	4.9	61.07	66.91	30.99	7.31	4.32	2.32	33.9	7.79	6.59	2.77	105.3	223.97	40	good	2
	Video 210	1	00:00:00	8/12/18 8/14/18	34	32.1	S	81.24	1.58	0.97	53.38	85.07	65.59	70.88	2.51	0.56	0.25	0.39	0.44	82.82	280.04	34	一侧少	6
		2	00:45:00		29	33.3	M	35.41	3.96	12.08	43.7	43.67	81.62	11.8	25.24	53.09	3.96	22.91	0.97	39.37	299.04	29	两侧少, delete
		3	01:35:00		36	31.4	S	82.39	5.62	5.76	32.74	54.68	43.94	0.4	34.41	2.67	9.04	68.26	49.34	88.01	301.24	36	一侧少
		4	02:40:00		38	28.7	M	99.15	13.47	4.46	19.51	69	8.31	22.54	1.44	4.34	6.79	7.3	63.3	112.62	206.99	38	ok
	Video 17 20181128	1	00:00:00	9/1/18 9/8/18	46	30	S	83.93	25.39	38.61	84.99	142.39	88.91	19.9	3.59	5.94	2.1	0.75	9.34	109.32	396.52	46	good	5
		2	00:30:00		52	33.5	M	63.34	0.74	20.65	40.76	52.32	43.05	25.58	9.59	3.3	19.99	3.75	22.49	64.08	241.48	52	good
		3	01:10:00		50	32.5	M	111.5	3.48	62.68	31.72	107.43	18.22	2.29	0.44	4.88	2.27	0.7	9.48	114.98	240.11	50	ok
		4	02:00:00		44	31.5	S	81.72	7.75	36.98	56.27	55.55	37.21	34.61	41.43	10.84	3.06	9.08	0.85	89.47	285.88	44	good
	Video 211	1	00:00:00	8/28/18	40	30.9	M	67.59	5.83	26	57.27	61.35	11.66	10.14	2.15	1.33	20.51	15.21	4.34	73.42	209.96	40	一侧没病毒，另一侧少,delete	3
		2	00:40:00		38	32	S	58.59	6.5	2.82	102.71	88.99	52.4	2.92	0.25	1.39	0.2	57.16	35.17	65.09	344.01	38	一侧少
		3	01:40:00		39	33.8	S	81.73	0.44	33.79	90.55	107.36	70.21	54.53	52.63	27.82	70.54	4.03	5.53	82.17	516.99	39	OK
		4	02:30:00		33	32.4	S	81.65	2.63	46.31	113.98	43.01	40.19	0.2	29.32	16.05	0.77	0.22	0	84.28	290.05	33	good
	Video 18 20181128	1	00:00:00		36	31.9	M	80.12	7.01	17.07	105.15	76.17	5.52	37.42	107.17	35.88	10.3	1.06	0.22	87.13	395.96	36	脑子找不到了 没有鉴定
12/4/18	Video 212	1	00:00:00	8/17/18 8/23/18	47	30.5	S	75.49	3.79	19.39	41.8	70.32	33.85	6.85	9.83	3.11	3.04	50.32	53.35	79.28	291.86	47	一侧没有病毒	2
		2	00:35:00		49	28.7	M	118.43	8.11	70.21	142.33	121.41	20.97	32.93	11.05	5.45	31.29	82.96	1.73	126.54	520.33	49	good
		3	01:25:00		48	33	S	107.43	24.89	26.12	52.21	23.32	9.71	15.41	19.85	12.95	31.89	3.36	0.25	132.32	195.07	48	few expression，delete
		4	02:25:00		41	27.6	S	102.43	15.33	2.13	59.41	6.89	7.05	45.96	3.39	3.38	3.15	6.02	4.52	117.76	141.9	41	偏瘫了 delete
1/5/18	Video 216 20190105	1	00:00:00	9/25/18 10/2/18	72	30.2	S	106.5	43.64	126.78	121.06	116.35	104.37	32.55	120.71	34.88	1.46	0.74	11.83	150.14	670.73
		2	00:30:00		66	30.8	S	105.74	35.94	57.43	58.97	3.54	3.35	36.81	29.91	34.05	0.39	0	0	141.68	224.45
		3	01:05:00		70	30.1	S	84.94	3.37	113.53	12.29	96.47	3.77	2.44	1.62	0.72	1.1	0	4.86	88.31	236.8
		4	01:45:00		71	30.5	S	129.46	27.26	69.93	99.83	39.69	59.85	34.11	2.74	11.98	2.93	25.26	27.83	156.72	374.15
		5	02:15:00	9/18/18 9/21/18 9/23/18	61	30.1	S	102.44	8.09	104.53	6.57	4.99	4.46	31.1	109.64	9.23	2.58	0.83	1.13	110.53	275.06
		6	02:50:00		59	29.2	S	118.38	5.44	90.27	104.42	47.54	8.35	3.06	1.36	0.97	0.59	0.4	0.39	123.82	257.35
	Video 1214	1	0		60	29.8	M	141.46	19.32	41.57	65.02	60.09	69.89	12.63	36.68	22	31.45	5.35	2.55	160.78	347.23
		2	00:30:00		58	32.2	M	104.79	8.25	55.09	70.75	9.38	37.91	1.69	0.22	0.19	2.35	0.58	0.21	113.04	178.37

## Sheet: 7l-o Hargreaves
				20181217	MOR-KIPB/AAV-Cre										20181218	MOR-KIPB/AAV-Cre										20181224	MOR-KIPB/AAV-Cre										20181224						20181231	MOR-KIPB/AAV-Cre
				Hargreaves		Intensity=10		cutoff time=20.1 sec				mean	mean		Hargreaves		Intensity=10		cutoff time=20.1 sec				mean	mean		Hargreaves		Intensity=10		cutoff time=20.1 sec				mean	mean		Hargreaves	morphine			mean		Hargreaves		Intensity=10		cutoff time=20.1 sec
DOB	injection date	virus	No.	Baseline	left hindpaw				right hindpaw			lhp	rhp		CFA d1	left hindpaw				right hindpaw			lhp	rhp		CFA d7	left hindpaw				right hindpaw			lhp	rhp		CFA d7	right hindpaw			rhp		CFA d14	left hindpaw				right hindpaw
		EGFP	C1-1	1	10.1	15.6		1	7.6	6.3		12.85	6.95		1	6.9	10.6		1	1.9	2.9		8.75	2.4		1	15.6	6.9		1	8.5	1.6		11.25	5.05		1	3.6	2.5		3.05		1	17.9	20		1	7.9	3.7
		Cre	C1-2	2	17.9	5.8		2	8.3	10.3		11.85	9.3		2	13.8	3.9		2	2.9	1.8		8.85	2.35		2	5.7	6.1		2	6.5	5.2		5.9	5.85		2	7.9	6.2		7.05		2	6.1	18.1		2	0.6	4.2
		EGFP	C1-4	4	11.9	8.9		4	13.6	8.3		10.4	10.95		4	6.2	13.7		4	0.7	0.7		9.95	0.7		4	10.6	10.1		4	1.5	3.5		10.35	2.5		4	4.2	1.8		3		4	5.2	5.3		4	3.3	4.7
		Cre	C1-5	5	12.8	9.3		5	8.2	11.4		11.05	9.8		5	13.3	9.4		5	5.7	1.7		11.35	3.7		5	9.8	5.5		5	2.6	4.9		7.65	3.75		5	6.3	12.2		9.25		5	11.9	11.7		5	5.9	1.7
		Cre	C2-1	6	6.9	8.1		6	15.4	7.9		7.5	11.65		6	16.9	8.9		6	2.9	1.3		12.9	2.1		6	6.1	7.7		6	6.9	3.8		6.9	5.35		6	16.5	14.4		15.45		6	5.3	6.5		6	1.4	9.7
		EGFP	C2-2	7	15.9	13.3		7	19.5	5.8		14.6	12.65		7	6.4	6.8		7	1.2	0.9		6.6	1.05		7	9.7	7.1		7	2.4	3.8		8.4	3.1		7	0.9	6.7		3.8		7	6.3	5.9		7	2.9	2.6
		Cre	C2-3	8	13.9	6.6		8	6.9	15.6		10.25	11.25		8	7.1	16.1		8	1.2	2.7		11.6	1.95		8	4.9	8.9		8	3.7	7.2		6.9	5.45		8	9.9	3.9		6.9		8	5.6	5.1		8	5.3	12.5
		EGFP	C2-4	9	8.3	6.2		9	5.1	5.9		7.25	5.5		9	13.9	5.6		9	1.9	0.9		9.75	1.4		9	9.8	14.5		9	3.8	4.4		12.15	4.1		9	5.6	6.2		5.9		9	7.4	5.9		9	3.9	4.9
		Cre	C2-5	10	19.3	14.9		10	19.9	20		17.1	19.95		10	11.9	5.1		10	4.5	1.4		8.5	2.95		10	6.9	9.6		10	4.2	2.9		8.25	3.55		10	5.5	6.9		6.2		10	20	6.2		10	3.2	9.5
		EGFP	C3-1	11	12.5	5.8		11	8.9	16.7		9.15	12.8		11	9.2	14.9		11	0.9	0.6		12.05	0.75		11	7	6.6		11	5.4	4.6		6.8	5		11	7.4	8.8		8.1		11	15.9	15.2		11	2.3	3.4
		Cre	C3-2	12	6.2	12.3		12	10.6	18.7		9.25	14.65		12	8.7	7.9		12	0.9	1.2		8.3	1.05		12	10.8	10.1		12	6.1	3.2		10.45	4.65		12	8.7	5.3		7		12	10.1	11.8		12	1.8	1.7
		Cre	C3-3	13	8.9	15.9		13	5.6	8.9		12.4	7.25		13	8.9	8.3		13	1.3	2.6		8.6	1.95		13	6.4	16.1		13	3.3	1.9		11.25	2.6		13	1.9	10.4	2.9	5.06667		13	11.3	7.5		13	1.4	9.6
		EGFP	C3-4	14	6.7	5.9		14	7.1	9.2		6.3	8.15		14	6.3	12.5		14	1.5	0.9		9.4	1.2		14	10.3	7.4		14	2.5	6.2		8.85	4.35		14	3.9	2.1		3		14	6.7	10.4		14	1.5	9.3
		EGFP	C3-5	15	8.6	13.6		15	11.9	12.4		11.1	12.15		15	8.2	9.5		15	0.9	0.8		8.85	0.85		15	10.8	7.5		15	3.3	1.5		9.15	2.4		15	4.6	5.9		5.25		15	6.9	9.9		15	2.6	6.1
		Cre	26	16	11.9	6.7		16	9.9	11.4		9.3	10.65		16	13.3	9.4		16	0.6	2.1		11.35	1.35		16	5.6	8.3		16	6.9	1.6		6.95	4.25		16	2.8	6.3		4.55		16	7.4	10.4		16	3.4	2.1
		EGFP	27	17	8.2	7.9		17	11.9	16.3		8.05	14.1		17	8.9	8.1		17	1.8	1.7		8.5	1.75		17	6.7	15.9		17	2.9	3.7		11.3	3.3		17	2.2	6.6		4.4		17	5.1	6.1		17	1.1	9.5
		EGFP	22	18	9.1	6.4		18	13.1	10.8		7.75	11.95		18	7.1	10.1		18	2.1	0.8		8.6	1.45		18	8.5	7.2		18	1.4	3.6		7.85	2.5		18	5.8	8.3		7.05		18	9.2	11.6		18	4.4	10.8
		Cre	19	19	13.4	12.2		19	12.6	14.5		12.8	13.55		19	6.8	8.9		19	2.8	4.1		7.85	3.45		19	10.7	7.3		19	5.6	5.9		9	5.75		19	10.2	6.2		8.2		19	6.4	17.8		19	2.6	3.5
		EGFP	17	20	6.3	9.7		20	20	8.8		8	14.4		20	9.7	7.9		20	2.2	2.1		8.8	2.15		20	10.9	5.7		20	2.8	3.7		8.3	3.25		20	3.9	12.7	1.9	6.16667		20	13.1	7.3		20	3.9	0.6
		EGFP	22	22	18.3	7.9		22	13.9	7.7		13.1	10.8		22	8.2	7.8		22	0.7	1.6		8	1.15		22	5.1	6.5		22	4.4	5.5		5.8	4.95		22	4.6	6.3		5.45		22	9.9	6.2		22	3.9	2.8
																										20181224											20181224						20181231
			Baseline																							Hargreaves											Hargreaves	morphine					Hargreaves
			No.	Baseline	left hindpaw				right hindpaw			lhp	rhp		CFA d1	left hindpaw				right hindpaw			lhp	rhp		CFA d7	left hindpaw				right hindpaw			lhp	rhp		CFA d7	right hindpaw			rhp		CFA d14	left hindpaw				right hindpaw
		EGFP	C1-1	1	10.1	15.6		1	7.6	6.3		12.85	6.95		1	6.9	10.6		1	1.9	2.9		8.75	2.4		1	15.6	6.9		1	8.5	1.6		11.25	5.05		1	3.6	2.5		3.05		1	17.9	20		1	7.9	3.7
		EGFP	C1-4	4	11.9	8.9		4	13.6	8.3		10.4	10.95		4	6.2	13.7		4	0.7	0.7		9.95	0.7		4	10.6	10.1		4	1.5	3.5		10.35	2.5		4	4.2	1.8		3		4	5.2	5.3		4	3.3	4.7
		EGFP	C2-2	7	15.9	13.3		7	19.5	5.8		14.6	12.65		7	6.4	6.8		7	1.2	0.9		6.6	1.05		7	9.7	7.1		7	2.4	3.8		8.4	3.1		7	0.9	6.7		3.8		7	6.3	5.9		7	2.9	2.6
		EGFP	C2-4	9	8.3	6.2		9	5.1	5.9		7.25	5.5		9	13.9	5.6		9	1.9	0.9		9.75	1.4		9	9.8	14.5		9	3.8	4.4		12.15	4.1		9	5.6	6.2		5.9		9	7.4	5.9		9	3.9	4.9
		EGFP	C3-1	11	12.5	5.8		11	8.9	16.7		9.15	12.8		11	9.2	14.9		11	0.9	0.6		12.05	0.75		11	7	6.6		11	5.4	4.6		6.8	5		11	7.4	8.8		8.1		11	15.9	15.2		11	2.3	3.4
		EGFP	C3-4	14	6.7	5.9		14	7.1	9.2		6.3	8.15		14	6.3	12.5		14	1.5	0.9		9.4	1.2		14	10.3	7.4		14	2.5	6.2		8.85	4.35		14	3.9	2.1		3		14	6.7	10.4		14	1.5	9.3
		EGFP	C3-5	15	8.6	13.6		15	11.9	12.4		11.1	12.15		15	8.2	9.5		15	0.9	0.8		8.85	0.85		15	10.8	7.5		15	3.3	1.5		9.15	2.4		15	4.6	5.9		5.25		15	6.9	9.9		15	2.6	6.1
		EGFP	27	17	8.2	7.9		17	11.9	16.3		8.05	14.1		17	8.9	8.1		17	1.8	1.7		8.5	1.75		17	6.7	15.9		17	2.9	3.7		11.3	3.3		17	2.2	6.6		4.4		17	5.1	6.1		17	1.1	9.5
		EGFP	22	18	9.1	6.4		18	13.1	10.8		7.75	11.95		18	7.1	10.1		18	2.1	0.8		8.6	1.45		18	8.5	7.2		18	1.4	3.6		7.85	2.5		18	5.8	8.3		7.05		18	9.2	11.6		18	4.4	10.8
		EGFP	17	20	6.3	9.7		20	20	8.8		8	14.4		20	9.7	7.9		20	2.2	2.1		8.8	2.15		20	10.9	5.7		20	2.8	3.7		8.3	3.25		20	3.9	12.7	1.9	6.16667		20	13.1	7.3		20	3.9	0.6
		EGFP	22	22	18.3	7.9		22	13.9	7.7		13.1	10.8		22	8.2	7.8		22	0.7	1.6		8	1.15		22	5.1	6.5		22	4.4	5.5		5.8	4.95		22	4.6	6.3		5.45		22	9.9	6.2		22	3.9	2.8
												9.86818	10.9455										9.02273	1.35										9.10909	3.68182						5.01515
		Cre	C1-2	2	17.9	5.8		2	8.3	10.3		11.85	9.3		2	13.8	3.9		2	2.9	1.8		8.85	2.35		2	5.7	6.1		2	6.5	5.2		5.9	5.85		2	7.9	6.2		7.05		2	6.1	18.1		2	0.6	4.2
		Cre	C1-5	5	12.8	9.3		5	8.2	11.4		11.05	9.8		5	13.3	9.4		5	5.7	1.7		11.35	3.7		5	9.8	5.5		5	2.6	4.9		7.65	3.75		5	6.3	12.2		9.25		5	11.9	11.7		5	5.9	1.7
		Cre	C2-1	6	6.9	8.1		6	15.4	7.9		7.5	11.65		6	16.9	8.9		6	2.9	1.3		12.9	2.1		6	6.1	7.7		6	6.9	3.8		6.9	5.35		6	16.5	14.4		15.45		6	5.3	6.5		6	1.4	9.7
		Cre	C2-3	8	13.9	6.6		8	6.9	15.6		10.25	11.25		8	7.1	16.1		8	1.2	2.7		11.6	1.95		8	4.9	8.9		8	3.7	7.2		6.9	5.45		8	9.9	3.9		6.9		8	5.6	5.1		8	5.3	12.5
		Cre	C2-5	10	19.3	14.9		10	19.9	20		17.1	19.95		10	11.9	5.1		10	4.5	1.4		8.5	2.95		10	6.9	9.6		10	4.2	2.9		8.25	3.55		10	5.5	6.9		6.2		10	20	6.2		10	3.2	9.5
		Cre	C3-2	12	6.2	12.3		12	10.6	18.7		9.25	14.65		12	8.7	7.9		12	0.9	1.2		8.3	1.05		12	10.8	10.1		12	6.1	3.2		10.45	4.65		12	8.7	5.3		7		12	10.1	11.8		12	1.8	1.7
		Cre	C3-3	13	8.9	15.9		13	5.6	8.9		12.4	7.25		13	8.9	8.3		13	1.3	2.6		8.6	1.95		13	6.4	16.1		13	3.3	1.9		11.25	2.6		13	1.9	10.4	2.9	5.06667		13	11.3	7.5		13	1.4	9.6
		Cre	26	16	11.9	6.7		16	9.9	11.4		9.3	10.65		16	13.3	9.4		16	0.6	2.1		11.35	1.35		16	5.6	8.3		16	6.9	1.6		6.95	4.25		16	2.8	6.3		4.55		16	7.4	10.4		16	3.4	2.1
		Cre	19	19	13.4	12.2		19	12.6	14.5		12.8	13.55		19	6.8	8.9		19	2.8	4.1		7.85	3.45		19	10.7	7.3		19	5.6	5.9		9	5.75		19	10.2	6.2		8.2		19	6.4	17.8		19	2.6	3.5
												11.2778	12.0056										9.92222	2.31667										8.13889	4.57778						7.74074
delete	1-3 验证为EGFP，不确定
delete	5-21 low expression

## Sheet: 7l-o von-Frey up and down
				20181217	MOR-KIPB/AAV-Cre						20181218	MOR-KIPB/AAV-Cre							20181224	MOR-KIPB/AAV-Cre					morphine (10 mg/kg, s.c.) 40 min				20181231	MOR-KIPB/AAV-Cre							20181231
				Baseline	von-Frey	up and down			up and down		CFA d1	von-Frey	up and down			up and down			CFA d7	von-Frey	up and down			up and down			up and down		CFA d14	von-Frey	up and down			up and down			CFA d14	morphine	30 min		60 min		90 min		120 min		180 min		240 min
DOB	injection date	virus	No.	lhp	O and X	threshold	rhp	O and X	threshold		lhp	O and X	threshold	rhp	O and X	threshold		BW (g)	lhp	O and X	threshold	rhp	O and X	threshold	rhp	O and X	threshold		lhp	O and X	threshold	rhp	O and X	threshold		BW(g)	rhp	O and X	threshold	O and X	threshold	O and X	threshold	O and X	threshold	O and X	threshold	O and X	threshold
		EGFP	C1-1	1	OOOOXXXOX	0.715	1	OOOOXXOOX	1.162		1	OOOXOXOO	1.028	1	OXOXOO	0.406		31.6	1	OOOXXOXO	0.593	1	OXOOXX	0.356	1	OXOXOO	0.406		1	OOOXOOXO	0.843	1	OXOXOX	0.283		32.6	1	OXOXOO	0.406	OXOXOX	0.283	OXOXXO	0.157	OOXXXOX	0.182	OXOXOO	0.406	OXOXOX	0.283
		Cre	C1-2	2	OOOOXXOXO	0.831	2	OOOOXXXOX	0.715		2	OOOXOXOO	1.028	2	OXOXOX	0.283		34.1	2	OOOOXXOXO	0.831	2	OXOXOO	0.406	2	OOXOXXO	0.377		2	OOXOOOX	0.781	2	OOXXOXX	0.221		33.8	2	OOOXOXOX	0.949	OOXOOXX	0.543	OXOXOO	0.406	OOXXOXO	0.306	OOOXXOXO	0.593	OXOXOO	0.406
		EGFP	C1-4	4	OOOXOOXO	0.843	4	OOOXOXXO	0.731		4	OOOXOOXX	1.103	4	OXOXOX	0.283		25	4	OOOXOXOX	0.949	4	XOXOOX	0.178	4	OXOOXX	0.356		4	OOOOXXOOX	1.162	4	OXOXOX	0.283		25.4	4	OOXXOOX	0.354	OXOOXO	0.42	OXOXXO	0.157	OXOXOX	0.283	XOXOOX	0.178	OOXXOXO	0.306
		Cre	C1-5	5	OOOOXXXOO	0.962	5	OOOOXOXXO	1.023		5	OOOOXOXXO	1.023	5	OXOXOO	0.406		29	5	OOOOXXOXX	0.851	5	OXOXOO	0.406	5	OOXXOOX	0.354		5	OOOXOOXX	1.103	5	OXOXOX	0.283		30.1	5	OOOXOXOX	0.949	OOXOXOO	0.616	OOOXXOOX	0.774	OXOOXX	0.356	OOOXXOXO	0.593	OXOOXO	0.42
		Cre	C2-1	6	OOXOOXO	0.59	6	OOOOXXOXX	0.851		6	OOOXOOXX	1.103	6	XOOOXX	0.283		27.7	6	OOOOXXOXO	0.831	6	OXOXOX	0.283	6	OXOOXO	0.42		6	OOXOOOX	0.781	6	OXOOXX	0.356		28.5	6	OOXOOXX	0.543	OOOXXOXO	0.593	OXOXOO	0.406	XOOOXX	0.283	XOXOXO	0.099	OXOOXO	0.42
		EGFP	C2-2	7	OOOOXOXXX	1.015	7	OOOXOOXX	1.103		7	OOXOOXO	0.59	7	XOXOOX	0.178		23	7	OOOXOXOX	0.949	7	OXOOXX	0.356	7	OXXOXO	0.125		7	OOOXOOXO	0.843	7	OXOXOO	0.406		22.5	7	XOOXOX	0.225	OXOXOX	0.283	OXXOOX	0.225	OXOXOX	0.283	OXOXOX	0.283	XOXOXO	0.099
		Cre	C2-3	8	OOOXOXOX	0.949	8	OOOXOXOX	0.949		8	OOOXOOXO	0.843	8	OXOXXO	0.157		32.3	8	OOOXXOOX	0.774	8	OOXXXOO	0.251	8	OOXOXOX	0.437		8	OOOXXOOX	0.774	8	OOXOXXO	0.377		32.9	8	OOXOOXO	0.59	OOXOOXX	0.543	OOXXXOX	0.182	OOXOXOX	0.437	OXOXOX	0.283	OXXOOO	0.326
		EGFP	C2-4	9	OOOXOXOX	0.949	9	OOOOXXOXO	0.831		9	OOXOOXO	0.59	9	OXOOXO	0.42		30.9	9	OOOXOXOX	0.949	9	OXXOOX	0.225	9	OXOXXO	0.157		9	OOOXOXOO	1.028	9	OOXXOXX	0.221		31.7	9	OXXOXO	0.125	OXOOXX	0.356	XOOXOX	0.225	OXOXOX	0.283	XOOXXO	0.125	XOOXOX	0.225
		Cre	C2-5	10	OOOXOXOX	0.949	10	OOOXOOXX	1.103		10	OOXOOOX	0.781	10	OXOXOX	0.283		27.5	10	OOXOOXO	0.59	10	OOXXOXO	0.306	10	OOXOOXX	0.543		10	OOOXOXOO	1.028	10	OOXXOXX	0.221		28.9	10	OOOXOXOO	1.028	OOOOXXOXX	0.851	OXOOXX	0.356	OXOXOX	0.283	XOOXOX	0.225	OOXOXOX	0.437
		EGFP	C3-1	11	OOOXOOXX	1.103	11	OOXOOXO	0.59		11	OOOOXXOXX	0.851	11	OXOXXO	0.157		29.4	11	OOOXXOXO	0.593	11	OXOOXX	0.356	11	OOXXOOX	0.354		11	OOOOXXOOX	1.162	11	OXOXOO	0.406		31.3	11	OOXXOOX	0.354	OOXXOOX	0.354	OXOOXO	0.42	OXOXOO	0.406	OXOXOX	0.283	OOXXOXO	0.306
		Cre	C3-2	12	OOOOXXOXO	0.831	12	OOXOOXX	0.543		12	OOXOOXO	0.59	12	XOXOOX	0.178		34.6	12	OOOXOXXO	0.731	12	OXOXOX	0.283	12	OOOXOXOO	1.028		12	OOOOXOXXO	1.023	12	OOXXOXO	0.306		34.6	12	OOOXXOOX	0.774	OOXOOOX	0.781	OXOOXO	0.42	OXOXOX	0.283	OOXXOXO	0.306	OXOOXX	0.356
		Cre	C3-3	13	OOOOXOXXO	1.023	13	OOXOOOX	0.781		13	OOOXOXOX	0.949	13	OXXOXO	0.125		31	13	OOOXXOXO	0.593	13	OXOXOO	0.406	13	OXOXOX	0.283		13	OOOOXOXXO	1.023	13	OXOXOX	0.283		32.4	13	OXOOXO	0.42	OXOXOO	0.406	OOXOXOO	0.616	OOXOXXO	0.377	OXOXOX	0.283	XOXOOX	0.178
		EGFP	C3-4	14	OOOXOXOX	0.949	14	OOXXOOO	0.499		14	OOOXOXOX	0.949	14	OXOXOX	0.283		28.5	14	OOOOXXXOX	0.715	14	XOOXXO	0.125	14	OXOOXX	0.356		14	OOOXOXOO	1.028	14	OXOXOX	0.283		29.5	14	OXOXOX	0.283	XOOXXO	0.125	OOXOOXX	0.543	OOXXOXX	0.221	OXOXOX	0.283	OOXXOXO	0.306
		EGFP	C3-5	15	OOOXOOXO	0.843	15	OOOXOOXO	0.843		15	OOOXXOOO	0.833	15	XOOXOX	0.225		29	15	OOOXOXOX	0.949	15	OXOXOX	0.283	15	OXOXOO	0.406		15	OOOXOOXX	1.103	15	OXOOXO	0.42		29.8	15	XOOXXO	0.125	OOOXXXXO	0.28	OOXXOOX	0.354	OOXXOXO	0.306	OOXXOOX	0.354	OXOOXX	0.356
		Cre	26	16	OOOXOXXO	0.731	16	OOOOXOXXX	1.015		16	OOXOOOX	0.781	16	OXXOOX	0.225		27.5	16	OOXOOXO	0.59	16	OXOXOX	0.283	16	OOXOXOX	0.437		16	OOOXXOOX	0.774	16	OXOXOX	0.283		28.1	16	OXOOXO	0.42	OOXOOXX	0.543	XOOXOO	0.326	OXOXOO	0.406	XOOOXO	0.412	OOXOXOO	0.616
		EGFP	27	17	OOXOXOO	0.616	17	OOOXOXOO	1.028		17	OOXOOOX	0.781	17	OOXXOOX	0.354		25.7	17	OOOOXXOOX	0.774	17	OXOXOX	0.283	17	OOXOXXO	0.377		17	OOXOOXX	0.543	17	OXOOXX	0.356		26.4	17	OXOXOO	0.406	OXOXXO	0.157	OXOXOX	0.283	OOXXOOX	0.354	OXOXOX	0.283	OXXOXO	0.125
		EGFP	22	18	OOOXXOOX	0.774	18	OOXOXOO	0.616		18	OOOOXOXXO	1.023	18	OXOOXX	0.356		29	18	OOOXOXXO	0.731	18	OOXOXXX	0.266	18	OXOOXO	0.42		18	OOOXOOXX	1.103	18	OXOXXO	0.157		29.3	18	OXXOXO	0.125	OXOXOX	0.283	XOOXOX	0.225	OXOOXX	0.356	OOXXXOX	0.182	OXXOXO	0.125
		Cre	19	19	OOOXXOOX	0.774	19	OOOXXOOX	0.774		19	OOOXOXOX	0.949	19	OXOXOX	0.283		33	19	OOOXOXOO	1.028	19	OXOOXO	0.42	19	OOXOXOX	0.437		19	OOOXOOXX	1.103	19	OXOXOX	0.283		33.7	19	OXOXOX	0.283	OXXOOX	0.225	OOXXOOX	0.354	XOXOXO	0.099	XOOXOX	0.225	OXXOXO	0.125
		EGFP	17	20	OOOOXOXXX	1.015	20	OXOOXO	0.42		20	OOOXXOOX	0.774	20	OXOXXX	0.107		28.6	20	OOOXOOXX	1.103	20	OXOXOX	0.283	20	OOXOXXO	0.377		20	OOOXOOXO	0.843	20	OXOXOO	0.406		29	20	OOXXOXO	0.306	OXOXOX	0.283	XOOXOX	0.225	XOOXOX	0.225	OOXXOOX	0.354	OXOXOX	0.283
		EGFP	22	22	OOOXOXXO	0.731	22	OOOOXXOOX	1.162		22	OOOXOOXX	1.103	22	XOXOOX	0.178		27.6	22	OOOXOXOO	1.028	22	OXOOXX	0.356	22	OOXXOXO	0.306		22	OOOXOXXO	0.731	22	XOOXOX	0.225		28.7	22	XOOXXO	0.125	OXOXOX	0.283	XOOXOO	0.326	OXOXOX	0.283	OXXOOX	0.225	OXOXOX	0.283
																													20181231								20181231
			Baseline			up and down			up and down		CFA d1		up and down			up and down			CFA d7		up and down			up and down			up and down		CFA d14		up and down			up and down			CFA d14	morphine	30 min	60 min	90 min	120 min	180 min	240 min
			No.	lhp	O and X	threshold	rhp	O and X	threshold		lhp	O and X	threshold	rhp	O and X	threshold			lhp	O and X	threshold	rhp	O and X	threshold	rhp	O and X	threshold		lhp	O and X	threshold	rhp	O and X	threshold			rhp	O and X	threshold	threshold	threshold	threshold	threshold	threshold
		EGFP	C1-1	1	OOOOXXXOX	0.715	1	OOOOXXOOX	1.162		1	OOOXOXOO	1.028	1	OXOXOO	0.406		31.6	1	OOOXXOXO	0.593	1	OXOOXX	0.356	1	OXOXOO	0.406		1	OOOXOOXO	0.843	1	OXOXOX	0.283			1	0.283	0.406	0.283	0.157	0.182	0.406	0.283
		EGFP	C1-4	4	OOOXOOXO	0.843	4	OOOXOXXO	0.731		4	OOOXOOXX	1.103	4	OXOXOX	0.283		25	4	OOOXOXOX	0.949	4	XOXOOX	0.178	4	OXOOXX	0.356		4	OOOOXXOOX	1.162	4	OXOXOX	0.283			4	0.283	0.354	0.42	0.157	0.283	0.178	0.306
		EGFP	C2-2	7	OOOOXOXXX	1.015	7	OOOXOOXX	1.103		7	OOXOOXO	0.59	7	XOXOOX	0.178		23	7	OOOXOXOX	0.949	7	OXOOXX	0.356	7	OXXOXO	0.125		7	OOOXOOXO	0.843	7	OXOXOO	0.406			7	0.406	0.225	0.283	0.225	0.283	0.283	0.099
		EGFP	C2-4	9	OOOXOXOX	0.949	9	OOOOXXOXO	0.831		9	OOXOOXO	0.59	9	OXOOXO	0.42		30.9	9	OOOXOXOX	0.949	9	OXXOOX	0.225	9	OXOXXO	0.157		9	OOOXOXOO	1.028	9	OOXXOXX	0.221			9	0.221	0.125	0.356	0.225	0.283	0.125	0.225
		EGFP	C3-1	11	OOOXOOXX	1.103	11	OOXOOXO	0.59		11	OOOOXXOXX	0.851	11	OXOXXO	0.157		29.4	11	OOOXXOXO	0.593	11	OXOOXX	0.356	11	OOXXOOX	0.354		11	OOOOXXOOX	1.162	11	OXOXOO	0.406			11	0.406	0.354	0.354	0.42	0.406	0.283	0.306
		EGFP	C3-4	14	OOOXOXOX	0.949	14	OOXXOOO	0.499		14	OOOXOXOX	0.949	14	OXOXOX	0.283		28.5	14	OOOOXXXOX	0.715	14	XOOXXO	0.125	14	OXOOXX	0.356		14	OOOXOXOO	1.028	14	OXOXOX	0.283			14	0.283	0.283	0.125	0.543	0.221	0.283	0.306
		EGFP	C3-5	15	OOOXOOXO	0.843	15	OOOXOOXO	0.843		15	OOOXXOOO	0.833	15	XOOXOX	0.225		29	15	OOOXOXOX	0.949	15	OXOXOX	0.283	15	OXOXOO	0.406		15	OOOXOOXX	1.103	15	OXOOXO	0.42			15	0.42	0.125	0.28	0.354	0.306	0.354	0.356
		EGFP	27	17	OOXOXOO	0.616	17	OOOXOXOO	1.028		17	OOXOOOX	0.781	17	OOXXOOX	0.354		25.7	17	OOOOXXOOX	0.774	17	OXOXOX	0.283	17	OOXOXXO	0.377		17	OOXOOXX	0.543	17	OXOOXX	0.356			17	0.356	0.406	0.157	0.283	0.354	0.283	0.125
		EGFP	22	18	OOOXXOOX	0.774	18	OOXOXOO	0.616		18	OOOOXOXXO	1.023	18	OXOOXX	0.356		29	18	OOOXOXXO	0.731	18	OOXOXXX	0.266	18	OXOOXO	0.42		18	OOOXOOXX	1.103	18	OXOXXO	0.157			18	0.157	0.125	0.283	0.225	0.356	0.182	0.125
		EGFP	17	20	OOOOXOXXX	1.015	20	OXOOXO	0.42		20	OOOXXOOX	0.774	20	OXOXXX	0.107		28.6	20	OOOXOOXX	1.103	20	OXOXOX	0.283	20	OOXOXXO	0.377		20	OOOXOOXO	0.843	20	OXOXOO	0.406			20	0.406	0.306	0.283	0.225	0.225	0.354	0.283
		EGFP	22	22	OOOXOXXO	0.731	22	OOOOXXOOX	1.162		22	OOOXOOXX	1.103	22	XOXOOX	0.178		27.6	22	OOOXOXOO	1.028	22	OXOOXX	0.356	22	OOXXOXO	0.306		22	OOOXOXXO	0.731	22	XOOXOX	0.225			22	0.225	0.125	0.283	0.326	0.283	0.225	0.283
		EGFP				0.868455			0.816818		EGFP		0.875			0.267909			EGFP		0.848455			0.278818			0.330909		EGFP		0.944455			0.313273				0.313273	0.257636	0.282455	0.285455	0.289273	0.268727	0.245182
		Cre	C1-2	2	OOOOXXOXO	0.831	2	OOOOXXXOX	0.715		2	OOOXOXOO	1.028	2	OXOXOX	0.283		34.1	2	OOOOXXOXO	0.831	2	OXOXOO	0.406	2	OOXOXXO	0.377		2	OOXOOOX	0.781	2	OOXXOXX	0.221			2	0.221	0.949	0.543	0.406	0.306	0.593	0.406
		Cre	C1-5	5	OOOOXXXOO	0.962	5	OOOOXOXXO	1.023		5	OOOOXOXXO	1.023	5	OXOXOO	0.406		29	5	OOOOXXOXX	0.851	5	OXOXOO	0.406	5	OOXXOOX	0.354		5	OOOXOOXX	1.103	5	OXOXOX	0.283			5	0.283	0.949	0.616	0.774	0.356	0.593	0.42
		Cre	C2-1	6	OOXOOXO	0.59	6	OOOOXXOXX	0.851		6	OOOXOOXX	1.103	6	XOOOXX	0.283		27.7	6	OOOOXXOXO	0.831	6	OXOXOX	0.283	6	OXOOXO	0.42		6	OOXOOOX	0.781	6	OXOOXX	0.356			6	0.356	0.543	0.593	0.406	0.283	0.099	0.42
		Cre	C2-3	8	OOOXOXOX	0.949	8	OOOXOXOX	0.949		8	OOOXOOXO	0.843	8	OXOXXO	0.157		32.3	8	OOOXXOOX	0.774	8	OOXXXOO	0.251	8	OOXOXOX	0.437		8	OOOXXOOX	0.774	8	OOXOXXO	0.377			8	0.377	0.59	0.543	0.182	0.437	0.283	0.326
		Cre	C2-5	10	OOOXOXOX	0.949	10	OOOXOOXX	1.103		10	OOXOOOX	0.781	10	OXOXOX	0.283		27.5	10	OOXOOXO	0.59	10	OOXXOXO	0.306	10	OOXOOXX	0.543		10	OOOXOXOO	1.028	10	OOXXOXX	0.221			10	0.221	1.028	0.851	0.356	0.283	0.225	0.437
		Cre	C3-2	12	OOOOXXOXO	0.831	12	OOXOOXX	0.543		12	OOXOOXO	0.59	12	XOXOOX	0.178		34.6	12	OOOXOXXO	0.731	12	OXOXOX	0.283	12	OOOXOXOO	1.028		12	OOOOXOXXO	1.023	12	OOXXOXO	0.306			12	0.306	0.774	0.781	0.42	0.283	0.306	0.356
		Cre	C3-3	13	OOOOXOXXO	1.023	13	OOXOOOX	0.781		13	OOOXOXOX	0.949	13	OXXOXO	0.125		31	13	OOOXXOXO	0.593	13	OXOXOO	0.406	13	OXOXOX	0.283		13	OOOOXOXXO	1.023	13	OXOXOX	0.283			13	0.283	0.42	0.406	0.616	0.377	0.283	0.178
		Cre	26	16	OOOXOXXO	0.731	16	OOOOXOXXX	1.015		16	OOXOOOX	0.781	16	OXXOOX	0.225		27.5	16	OOXOOXO	0.59	16	OXOXOX	0.283	16	OOXOXOX	0.437		16	OOOXXOOX	0.774	16	OXOXOX	0.283			16	0.283	0.42	0.543	0.326	0.406	0.412	0.616
		Cre	19	19	OOOXXOOX	0.774	19	OOOXXOOX	0.774		19	OOOXOXOX	0.949	19	OXOXOX	0.283		33	19	OOOXOXOO	1.028	19	OXOOXO	0.42	19	OOXOXOX	0.437		19	OOOXOOXX	1.103	19	OXOXOX	0.283			19	0.283	0.283	0.225	0.354	0.099	0.225	0.125
		Cre				0.848889			0.861556				0.894111			0.247					0.757667			0.338222			0.479556				0.932222			0.290333				0.290333	0.661778	0.566778	0.426667	0.314444	0.335444	0.364889

## Sheet: 7-s1f-oprmai9 specif and effici
	Double-labeled/Oprm1+					Double-labeled/tdTomato+
Cortex	30.6818	17.1141	32.377	21.96	44.59	81.8182	88.6957	90.8046	93.07	88.03
NAc	24.0625	23.3818		33.96	40.2	95.0617	94.6524		98.91	95.75
Striatum	19.7417	8.52878	7.23906	18.51	22.32	90.678	83.3333	100	95.38	95.18
Hypothalamus	44.25	36.1516	31.5234	34.6	50.57	95.6757	81.3115	90.8696	90.11	100
Thalamus	87.3171	86.3208	84.3858	84.78	85.34	99.5828	85.514	97.2222	96.38	98.48
CeA	33.0601	55.3232	45.8693	60.31	69.63	100	94.7883	90.9536	97.53	97.59
PAG	31.5385	22.7766	23.5479	29.23	42.34	96.8504	85.3659	89.8204	93.83	96.2
PB	83.609	54.1516	65.288	74.92	78.48	98.5816	87.2093	99.3258	96.09	98.02
Total	48.0731	37.7042	45.1412	48.26	54.73	97.0654	87.5197	94.993	95.86	96.88

## Sheet: 7-s2b-tail immersion 50
tail immersion				MORPHINE: 10mg/kg s.c.			cut-off time： 20s
50℃（水浴锅显示43）
	cre+		withdrawal latency (s)						%MPE
experiment time	Mouse NO.	DOB	Baseline		average	40 mins after morphine		average		weight
7/28/18	1	4/24/18	3.99	3.69	3.84	3.03	3.93	3.48		29.1
	2		3.09	3.1	3.095	3.34	4.12	3.73		25.6
	3		3.69	3.66	3.675	4.4	3.8	4.1		27
	4		4.26	3.66	3.96	3.16	3.61	3.385		28.7
	34	4/27/18	3.19	3.81	3.5	3.81	4.41	4.11		30.8
	33		3.44	4.12	3.78	3.32	3.78	3.55		32.8
	36		4.15	3.63	3.89	4.62	4.31	4.465		22.9
9/29/18	42	5/25/18 6/15/18	5.3	3.62	4.46	3.94	4.61	4.275		31.8
	47		3.75	3.1	3.425	4.34	4.46	4.4		33.1
	45		2.9	3.25	3.075	3.9	4.81	4.355		32.6	1
	40		4.04	4	4.02	3.32	2.93	3.125		30.8
	38		3.07	3.13	3.1	5.03	2.79	3.91		27.7
	3	6/24/18	2.63	3.72	3.175	3.94	4.57	4.255		30
	5		6	4.97	5.485	5.34	4.87	5.105		27
	1		3.9	5.62	4.76	6.47	3.87	5.17		27.6
	2		5.41	4.5	4.955	4.91	3.52	4.215		31.9
	6		3.86	4	3.93	5.82	4.51	5.165		31.1
	4		3.88	3.03	3.455	4.22	3.12	3.67		29.1
10/12/18	5	7/9/18	3.06	4.1	3.58	3.31	4.01	3.66		25.6
	2		4.15	4.83	4.49	3.93	3.82	3.875		26.2
	1		3.84	3.66	3.75	3.37	4.34	3.855		26.6
	4		3.5	3.9	3.7	3.5	4.38	3.94		26.1
	3		4.16	4.28	4.22	3.33	4.72	4.025		26.7	1

## Sheet: 7-s2c-hot plate 52
tail immersion				MORPHINE: 10mg/kg s.c.			cut-off time： 20s
50℃（水浴锅显示43）
	cre+		withdrawal latency (s)						%MPE
experiment time	Mouse NO.	DOB	Baseline		average	40 mins after morphine		average
7/28/18	1	4/24/18	17.5	17.2	17.35	13.6	12.5	13.05
	2		19.9	15.4	17.65	16.6	17.5	17.05
	3		11.5	9.2	10.35	10.5	10.9	10.7
	4		20.8	15.2	18	21	16.7	18.85
	34	4/27/18	24.9	24.5	24.7	25.1	13.6	19.35
	33		31.5	22.7	27.1	23.9	32.7	28.3
	36		22.5	17.3	19.9	25.1	19.3	22.2
9/29/18	42	5/25/18 6/15/18	21.5	16.1	18.8	16.9	13.5	15.2
	47		28.6	17.6	23.1	21.5	22.4	21.95
	45		30.5	29.3	29.9	18.8	26.7	22.75	delete
	40		27.4	15.4	21.4	9.8	13.6	11.7
	38		25.4	31.2	28.3	12.1	23.2	17.65
	3	6/24/18	20.7	12.7	16.7	12.3	12.2	12.25
	5		19.1	13.2	16.15	14.2	19	16.6
	1		15.4	8.6	12	14.4	7.6	11
	2		16	11.3	13.65	7.6	15.4	11.5
	6		17.8	8.3	13.05	16.9	11	13.95
	4		16.5	16.8	16.65	16.5	12.9	14.7
10/12/18	5	7/9/18	11	10	10.5	9.5	10	9.75
	2		19.1	15.9	17.5	17.9	24.1	21
	1		17.9	16.8	17.35	15.2	13.8	14.5
	4		21.7	16.5	19.1	24.2	17	20.6
	3		14.2	10.9	12.55	8.4	13.7	11.05	delete

## Sheet: 7-s2d-von frey 10mg per kg
	date： / /
experiment time	mouse no.	0.07		0.16		0.4		0.6		1		1.4		DOB
		before	after	before	after	before	after	before	after	before	after	before	after	4/24/18
7/30/18	1	0	0	0	0	0	0	3	4	3	4	4	4
	2	0	0	0	0	3	1	3	2	4	3	5	5
	3	0	0	0	1	0	2	2	5	5	4	5	5
	4	0	0	0	0	2	3	3	4	5	3	5	4	4/27/18
	34	0	0	0	0	2	0	3	4	4	4	5	5
	36	0	0	0	0	1	2	3	2	4	3	5	5
	33	0	0	1	0	1	2	3	3	4	4	5	4
10/12/18	47	0	0	1	1	1	2	3	3	5	4	5	5	5/25/18 6/15/18
	38	0	1	0	0	1	1	2	3	3	4	4	4
	42	0	0	0	1	2	2	4	3	4	3	4	5
	45	0	1	0	0	3	2	4	3	3	4	5	5			delete
	40	1	0	1	0	1	2	5	5	4	5	5	5
	2	0	0	0	0	3	3	3	3	4	5	5	5	6/24/18
	6	1	0	1	0	2	2	3	3	4	4	4	4
	4	0	1	1	1	2	2	2	2	4	3	5	4
	1	1	0	2	1	2	2	3	3	5	5	5	5
	3	0	1	0	0	2	3	4	4	4	5	5	5
	5	1	0	0	0	1	2	4	5	4	5	5	5
	5	1	1	1	3	2	3	4	4	4	5	5	5	7/9/18
	2	1	1	1	2	1	1	2	4	4	5	5	5
	1	0	0	0	1	1	1	2	2	5	5	5	5
	4	0	1	1	0	2	3	3	3	4	4	5	5
	3	0	0	0	0	1	1	2	2	5	4	4	4			delete

## Sheet: 7-s2ef locomotor
			Independent Variable	Distance moved	Velocity	In zone
			Independent Variable	center-point	center-point	Arena / center-point
			<User-defined 1>	Total	Mean	Cumulative Duration
20181023				cm	cm/s	s
Result 1	Trial 1	Arena 1	1	3929.27	6.59895	595.605		1		39.2927
Result 1	Trial 1	Arena 2	2	3735.58	6.36572	594.105		2		37.3558
Result 1	Trial 1	Arena 3	3	2989.05	5.25938	584.605		3		29.8905
Result 1	Trial 1	Arena 4	4	3196.09	5.36663	595.605		4		31.9609
Result 1	Trial 2	Arena 1	5	4101.3	6.88658	595.605		5		41.013
Result 1	Trial 2	Arena 2	6	2840.28	4.82589	593.661		6		28.4028
Result 1	Trial 2	Arena 3	7	2411.42	4.3911	578.272		45		24.1142
Result 1	Trial 2	Arena 4	8	2969.17	4.98559	595.605		47		29.6917
Result 1	Trial 3	Arena 1	9	2533.04	4.25567	595.438		42		25.3304
Result 1	Trial 3	Arena 2	10	3376.28	5.68723	595.383		38		33.7628
Result 1	Trial 3	Arena 3	11	3184.69	5.56499	586.827		40		31.8469
Result 1	Trial 3	Arena 4	12	4147.5	6.96611	595.438		1		41.475
Result 1	Trial 4	Arena 1	13	6901.91	11.5881	595.661		2		69.0191
Result 1	Trial 4	Arena 2	14	4358.95	7.31989	595.661		3		43.5895
Result 1	Trial 4	Arena 3	15	5170.66	8.88099	592.383		4		51.7066
Result 1	Trial 4	Arena 4	16	4393.58	7.37667	595.661		5		43.9358
Result 1	Trial 5	Arena 1	1-2	2598.4	4.36548	595.383		1		25.984
Result 1	Trial 5	Arena 2	2-2	2276.27	3.8534	594.55		2		22.7627
Result 1	Trial 5	Arena 3	3-2	2608.1	4.51755	590.494		3		26.081
Result 1	Trial 5	Arena 4	4-2	2058.39	3.45758	595.383		4		20.5839
Result 1	Trial 6	Arena 1	5-2	3040.07	5.10655	595.383		5		30.4007
Result 1	Trial 6	Arena 2	6-2	1553.88	2.61967	594.938		6		15.5388
Result 1	Trial 6	Arena 3	7-2	1590.85	2.78638	587.439		45		15.9085
Result 1	Trial 6	Arena 4	8-2	2111.32	3.54648	595.383		47		21.1132
Result 1	Trial 7	Arena 1	9-2	1499.78	2.52043	595.438		42		14.9978
Result 1	Trial 7	Arena 2	10-2	2946.38	4.95195	595.438		38		29.4638
Result 1	Trial 7	Arena 3	11-2	955.939	1.64064	591.883		40		9.55939
Result 1	Trial 7	Arena 4	12-2	3015.61	5.06499	595.438		1		30.1561
Result 1	Trial 8	Arena 1	13-2	4951.81	8.3178	595.383		2		49.5181
Result 1	Trial 8	Arena 2	14-2	2699.67	4.53984	595.272		3		26.9967
Result 1	Trial 8	Arena 3	15-2	3620.24	6.19203	592.494		4		36.2024
Result 1	Trial 8	Arena 4	16-2	3237.11	5.43753	595.383		5		32.3711
20181123
Distance (cm)	Data File	Group	#1		Mouse NO.	weight(g)
AFTER M MOUSE01	181124120026.zdat		2293.3		14	36.2
AFTER M MOUSE02	181124120026.zdat		2386.4		17	30.9
AFTER M MOUSE03	181124120026.zdat		2206.8		18	28.7
AFTER M MOUSE04	181124121222.zdat		3313.9		48	31.4	delete
AFTER M MOUSE05	181124121222.zdat		3442.4		49	27.7
AFTER M MOUSE06	181124121222.zdat		2739.8		47	30.5
AFTER M MOUSE07	181124121222.zdat		3767.9		40	31.1
AFTER M MOUSE08	181124122410.zdat		5064.3		41	28.7	delete
AFTER M MOUSE09	181124122410.zdat		1481.4		36	31.2
AFTER M MOUSE10	181124122410.zdat		4363.3		40	30.2	delete
AFTER M MOUSE11	181124122410.zdat		2446.9		33	31.3
AFTER M MOUSE12	181124123547.zdat		3366.6		38	32
AFTER M MOUSE13	181124123547.zdat		1924.1		39	33.5
AFTER M MOUSE14	181124123547.zdat		2556.2		52	33.2
AFTER M MOUSE15	181124123547.zdat		3636.6		44	30.9
AFTER M MOUSE16	181124124726.zdat		4133.2		46	29.8
AFTER M MOUSE17	181124124726.zdat		2033		50	32.6
AFTER M MOUSE18	181124124726.zdat		3476.3		34	31.4
AFTER M MOUSE19	181124124726.zdat		3121.1		38	28.1
AFTER M MOUSE20	181124125925.zdat		2400.7		36	30.7
AFTER M MOUSE21	181124125925.zdat		3512.2		29	32.3	delete
BASE MOUSE01	181124105935.zdat		4289.7		14
BASE MOUSE02	181124105935.zdat		2896.2		17
BASE MOUSE03	181124105935.zdat		2877.5		18
BASE MOUSE04	181124105935.zdat		3567		48		delete
BASE MOUSE05	181124111334.zdat		4121.6		49
BASE MOUSE06	181124111334.zdat		3085.9		47
BASE MOUSE07	181124111334.zdat		3499.4		40
BASE MOUSE08	181124111334.zdat		5079.3		41		delete
BASE MOUSE09	181124112517.zdat		3169.2		36
BASE MOUSE10	181124112517.zdat		4452.3		40		delete
BASE MOUSE11	181124112517.zdat		3750.6		33
BASE MOUSE12	181124112517.zdat		4267.3		38
BASE MOUSE13	181124113655.zdat		3744.6		39
BASE MOUSE14	181124113655.zdat		4141		52
BASE MOUSE15	181124113655.zdat		3368.3		44
BASE MOUSE16	181124113655.zdat		5286.1		46
BASE MOUSE17	181124114802.zdat		3824		50
BASE MOUSE18	181124114802.zdat		4295		34
BASE MOUSE19	181124114802.zdat		4463.4		38
BASE MOUSE20	181124114802.zdat		4027.7		36
BASE MOUSE21	181124120026.zdat		4612.4		29		delete
Speed (cm/s)	Data File	Group	#1
AFTER M MOUSE01	181124120026.zdat		10.8		14
AFTER M MOUSE02	181124120026.zdat		10.1		17
AFTER M MOUSE03	181124120026.zdat		11.3		18
AFTER M MOUSE04	181124121222.zdat		12.9		48		delete
AFTER M MOUSE05	181124121222.zdat		12.2		49
AFTER M MOUSE06	181124121222.zdat		11.7		47
AFTER M MOUSE07	181124121222.zdat		12.1		40
AFTER M MOUSE08	181124122410.zdat		13.7		41		delete
AFTER M MOUSE09	181124122410.zdat		10.7		36
AFTER M MOUSE10	181124122410.zdat		13.9		40		delete
AFTER M MOUSE11	181124122410.zdat		11.3		33
AFTER M MOUSE12	181124123547.zdat		12.5		38
AFTER M MOUSE13	181124123547.zdat		10.1		39
AFTER M MOUSE14	181124123547.zdat		10.4		52
AFTER M MOUSE15	181124123547.zdat		12.4		44
AFTER M MOUSE16	181124124726.zdat		13		46
AFTER M MOUSE17	181124124726.zdat		10.2		50
AFTER M MOUSE18	181124124726.zdat		13.3		34
AFTER M MOUSE19	181124124726.zdat		12.5		38
AFTER M MOUSE20	181124125925.zdat		11.2		36
AFTER M MOUSE21	181124125925.zdat		12.4		29		delete
BASE MOUSE01	181124105935.zdat		12.6		14
BASE MOUSE02	181124105935.zdat		10.3		17
BASE MOUSE03	181124105935.zdat		11.1		18
BASE MOUSE04	181124105935.zdat		11.7		48		delete
BASE MOUSE05	181124111334.zdat		12.5		49
BASE MOUSE06	181124111334.zdat		10.8		47
BASE MOUSE07	181124111334.zdat		11.9		40
BASE MOUSE08	181124111334.zdat		12.8		41		delete
BASE MOUSE09	181124112517.zdat		11.2		36
BASE MOUSE10	181124112517.zdat		11.9		40		delete
BASE MOUSE11	181124112517.zdat		11.2		33
BASE MOUSE12	181124112517.zdat		12.6		38
BASE MOUSE13	181124113655.zdat		11		39
BASE MOUSE14	181124113655.zdat		11.6		52
BASE MOUSE15	181124113655.zdat		10.6		44
BASE MOUSE16	181124113655.zdat		13.9		46
BASE MOUSE17	181124114802.zdat		11.2		50
BASE MOUSE18	181124114802.zdat		12.5		34
BASE MOUSE19	181124114802.zdat		12.9		38
BASE MOUSE20	181124114802.zdat		12.1		36
BASE MOUSE21	181124120026.zdat		13.5		29		delete
